# Supplementary material for: Cancer coopts differentiation of B-cell precursors into macrophages
Source: Research Square preprint supplement (doi:10.21203/rs.3.rs-858433/v1), 2021-09-13
Supplement: Supplementary file 1 [file 682300bb48f2a1e9291b61b7.xlsx]

## Sheet: Suppl.Table 1_BBCM4TCMvsBBCBCM
Genename	logFC	logCPM	LR	PValue	FDR
Ccl2	12.2437	11.1869	3133.94	0	0
Ccl6	11.7295	10.9924	2942.94	0	0
Dab2	11.5654	7.76363	2615.28	0	0
Fcgr4	11.4768	6.51293	2335.31	0	0
Mmp8	11.4121	9.77369	3057.17	0	0
Anpep	11.3492	9.63267	2587.63	0	0
Anxa3	11.2754	8.56694	2739.31	0	0
Ifi202b	11.2412	7.9512	2680.47	0	0
Fam20c	11.1642	8.28508	2890.33	0	0
Clec4d	11.148	9.24141	2672.81	0	0
Gpnmb	11.0204	10.281	3264.51	0	0
Ccl9	10.947	9.80003	2608.77	0	0
Emilin2	10.9093	9.67746	3200.43	0	0
Fcgr3	10.9069	9.70602	3180.03	0	0
Lilrb4	10.7932	9.85434	2871.5	0	0
Plau	10.6828	7.8273	2469.42	0	0
Hk3	10.6812	6.66142	2156.76	0	0
C77080	10.3512	6.83665	1886.52	0	0
P2ry6	10.3406	7.92599	2357.95	0	0
Rab34	10.2338	5.35725	2087.46	0	0
Cd14	10.1527	8.53878	2671	0	0
Cd68	10.135	8.95601	2580.61	0	0
Tnfaip2	10.1051	6.54419	1768.06	0	0
Hal	10.0378	8.3078	2411.42	0	0
Metrnl	9.94126	8.52872	2492.73	0	0
Fabp3	9.87705	6.28035	2019.74	0	0
Stab1	9.64171	6.5559	2267.09	0	0
Adam8	9.63191	10.0023	2420.38	0	0
Tnfsfm13	9.63147	5.69298	1862.86	0	0
Anxa2	9.58841	10.1809	1487.43	0	0
Ppm1h	9.3717	5.17274	1951.12	0	0
Tgfbi	9.32253	7.60551	2225.45	0	0
Igsf6	9.31166	6.75191	1921.3	0	0
Apoc2	9.28356	6.99977	1937.95	0	0
Lgals3	9.22518	10.7031	2863.56	0	0
Pf4	9.17908	11.0144	2561.14	0	0
Tlr13	9.09109	8.38388	2437.36	0	0
App	9.0662	7.71895	949.16	2.02025e-208	7.75413e-207
Hacd4	9.00368	6.66327	1937.65	0	0
Abcc3	8.98675	5.30211	1715.14	0	0
Timp2	8.96116	6.42978	1252.12	2.86675e-274	1.79654e-272
Fabp4	8.94518	7.71004	2421.19	0	0
S100a6	8.9168	9.07144	2803.19	0	0
Fcer1g	8.91134	10.434	2749.48	0	0
Cd63	8.8788	10.1822	2553.9	0	0
Syngr1	8.83897	7.84999	2481.31	0	0
6430548M08Rik	8.83815	4.2053	1710.14	0	0
Rnf128	8.75481	8.21845	1296.71	5.8731e-284	3.9052e-282
Mertk	8.69091	3.43668	1212.89	9.63237e-266	5.75625e-264
Dpep2	8.57776	6.04113	1449.59	3.51320940543262e-317	2.97949609821966e-315
Xdh	8.57655	4.19593	1373.5	1.20742e-300	9.04798e-299
AF251705	8.55703	7.74375	1648.32	0	0
Snx24	8.51092	5.15642	1840.1	0	0
Rbm47	8.42235	4.76669	1684.67	0	0
Myof	8.36106	6.25962	1473.04	2.81617418129511e-322	2.50837128393601e-320
Lrp1	8.35288	5.76603	1812.07	0	0
Cadm1	8.32788	5.34469	439.927	1.12311e-97	1.69219e-96
Basp1	8.32201	8.79287	1845.69	0	0
Ttyh2	8.28343	5.84262	1641.27	0	0
Mocos	8.28119	6.80386	2082.45	0	0
Oas2	8.23791	6.45673	2041.22	0	0
Tmem51	8.21908	5.06658	1854.5	0	0
Olfm1	8.21206	6.83747	1727.25	0	0
Epb4.1l1	8.2075	4.30096	1485.69	0	0
Efemp2	8.19659	4.61089	1492.26	0	0
Ltbp3	8.19211	3.8452	1097.59	1.10358e-240	5.46506e-239
Ccnd1	8.18074	5.7301	1668.3	0	0
Ahnak	8.17444	5.08825	1672.92	0	0
Ccdc109b	8.14061	5.28782	1530.69	0	0
Cebpd	8.13863	6.91325	1748.79	0	0
Itgb5	8.12321	6.90571	1933.65	0	0
Srxn1	8.06659	6.23601	1566.03	0	0
Cela1	8.06117	4.48908	1436.85	2.06181610125843e-314	1.71773537894917e-312
Stfa2	7.97758	4.65593	1268.99	6.21074e-278	3.98021e-276
Lhfpl2	7.97387	5.74521	1644	0	0
Ptgs1	7.9413	5.43543	1699.03	0	0
Clec4a1	7.83867	6.76994	144.378	2.93749e-33	1.52116e-32
2021-09-08	7.81731	6.93032	1790.82	0	0
S100a8	7.79052	6.73329	2012.44	0	0
Trim47	7.78894	5.61767	502.551	2.64817e-111	4.59632e-110
Fam198b	7.78268	6.26793	1738.3	0	0
Il13ra1	7.72351	4.47416	1112.33	6.9157e-244	3.61428e-242
Rab3il1	7.71852	7.71376	2168.38	0	0
Tubb6	7.68818	8.14068	2218.07	0	0
Spats2	7.65359	3.1732	1082.22	2.41419e-237	1.15125e-235
Clec12a	7.64263	6.88071	2203.75	0	0
Tyrobp	7.62368	9.8728	2442.41	0	0
Pira6	7.6125	6.50079	1964.58	0	0
Atf3	7.61148	6.64222	2092.21	0	0
Rtp4	7.60316	8.74983	1997.54	0	0
Cebpb	7.58804	8.12794	2061.8	0	0
Aif1	7.56931	7.41617	1854.88	0	0
Cd300ld	7.55175	6.22931	1582.5	0	0
Sirpa	7.53001	8.30824	1981.49	0	0
Atf7	7.52685	6.68705	1469.25	1.87744945419674e-321	1.65156264091812e-319
BC021767	7.49032	4.08448	1401.2	1.15536e-306	8.99083e-305
Ifitm3	7.42863	9.98786	2285.59	0	0
Maf	7.40931	6.52479	1969.66	0	0
Lgals3bp	7.35427	9.6673	2217.37	0	0
Hmox1	7.346	8.3959	2146.4	0	0
Palld	7.32963	3.09943	1068.54	2.276e-234	1.04659e-232
C1qb	7.31235	6.1521	1646.65	0	0
Chil3	7.30676	5.33348	1609.57	0	0
Ctsl	7.29926	11.1572	1992.93	0	0
Lilra6	7.28998	7.15909	1992.65	0	0
B430306N03Rik	7.2892	7.78536	1337.67	7.37775e-293	5.12211e-291
Fcgrt	7.24264	5.41511	1690.9	0	0
Trpv4	7.24024	4.2244	1480.85	4.94065645841247e-324	4.44659081257122e-322
Tnfsf12	7.23394	3.14301	1088.88	8.63972e-239	4.17626e-237
Hfe	7.22464	4.89	1497.94	0	0
Cln8	7.15	6.58575	1937.19	0	0
Ltbr	6.97047	6.10806	1773.83	0	0
Tnfrsf1a	6.96251	7.15201	1829.49	0	0
Cysltr1	6.96065	5.26152	1518.86	0	0
C4b	6.94777	3.02334	1062.46	4.76557e-233	2.17725e-231
Lrg1	6.93335	4.2994	1176.34	8.47761e-258	4.74579e-256
Afp	6.92832	3.27782	1151.91	1.72212e-252	9.45363e-251
Chit1	6.86957	4.36849	1038.73	6.84274e-228	3.00042e-226
Sash1	6.85603	6.55529	1943.49	0	0
Ugt1a6b	6.85105	4.89415	1348.11	3.96201e-295	2.86295e-293
Tbkbp1	6.84216	5.95982	1508.62	0	0
Nrp1	6.84108	7.46665	2117.46	0	0
Spp1	6.76829	11.0171	1515.02	0	0
LOC102640328	6.71664	3.24903	898.635	1.94356e-197	6.93367e-196
Scamp1	6.69723	6.70776	1648.17	0	0
Arhgef10l	6.6813	4.67433	1437.28	1.6679438142787e-314	1.39781587228397e-312
Lppr3	6.6466	4.22939	1408.7	2.69951e-308	2.16007e-306
Lmna	6.59196	8.20621	1949.88	0	0
2210408F21Rik	6.57108	3.89586	1186.46	5.34739e-260	3.05384e-258
Morn4	6.55017	4.7727	1460.78	1.30008434046666e-319	1.11594508613033e-317
Batf2	6.5161	4.00813	1128.94	1.69476e-247	8.9563e-246
Iffo2	6.4805	3.58447	1153.86	6.48614e-253	3.57445e-251
Mpeg1	6.47713	10.4526	1894.7	0	0
Pvrl2	6.42494	3.12451	890.21	1.31834e-195	4.65628e-194
Plod1	6.41028	5.15854	1348.69	2.97293e-295	2.17039e-293
Frmd4b	6.40406	4.53226	1337.22	9.22388e-293	6.37258e-291
Sqrdl	6.39396	5.7326	1348.59	3.11475e-295	2.26227e-293
Kcnk13	6.38407	6.25331	1346.46	9.07313e-295	6.49004e-293
Fos	6.3812	8.79257	1638.19	0	0
Aatk	6.37248	3.85736	1194.49	9.62445e-262	5.5411e-260
Hip1	6.35964	4.36339	1242.27	3.96296e-272	2.44032e-270
Hsd3b7	6.3338	6.54869	1736.35	0	0
Eno2	6.32929	3.5722	594.911	2.14153e-131	4.71703e-130
Pik3cb	6.30589	3.17384	973.573	9.96928e-214	4.02265e-212
Hexa	6.29123	9.35783	1902.61	0	0
Man1c1	6.21865	4.7274	1302.9	2.65456e-285	1.78183e-283
Rab11fip5	6.20166	7.10561	1644.24	0	0
Wfdc18	6.20151	4.41688	1206.32	2.57802e-264	1.52135e-262
Itpripl2	6.1982	4.9054	964.095	1.14521e-211	4.46823e-210
Cgnl1	6.19641	3.68153	1104.33	3.79e-242	1.89674e-240
1110046J04Rik	6.18825	3.01596	724.756	1.23738e-159	3.37018e-158
Cfp	6.18429	9.79903	1721.04	0	0
F13a1	6.16744	8.72952	1837.17	0	0
Slc6a8	6.16159	6.14377	1693.35	0	0
Fam129b	6.15284	8.83943	1919.18	0	0
Nacc2	6.13058	5.1253	1399.33	2.93345e-306	2.2703e-304
S100a1	6.11836	5.33045	1267.86	1.08932e-277	6.94955e-276
Mlkl	6.10367	4.05309	1095.53	3.09744e-240	1.51796e-238
Saa1	6.0808	6.4854	1424.45	1.01997754594881e-311	8.39880347864709e-310
Acp2	6.0276	3.9122	1028.55	1.11973e-225	4.80568e-224
Ttc12	6.01238	4.63316	1369.74	7.90307e-300	5.86027e-298
Acvrl1	5.99	5.20935	1346.73	7.89964e-295	5.67932e-293
Lrp12	5.95835	7.62415	1145.01	5.46196e-251	2.95258e-249
Ctsd	5.93722	11.2463	1405.44	1.38276e-307	1.09408e-305
Tmem141	5.93716	6.99875	1686.04	0	0
Pdgfb	5.93401	3.65349	847.971	2.00716e-186	6.75235e-185
Vat1	5.92172	6.85782	1314.02	1.01465e-287	6.87583e-286
Gramd1b	5.92048	4.40486	1286.55	9.48615e-282	6.22002e-280
Tgm2	5.91081	6.42273	1473.72	2.02566914794911e-322	1.81569124846658e-320
Gas2l1	5.8978	6.40644	1674.55	0	0
Ctbp2	5.86835	5.0092	1319.74	5.79996e-289	3.94927e-287
Papss2	5.85026	5.95391	1151.33	2.30953e-252	1.26293e-250
Atp6v0a1	5.8056	7.85947	1552.88	0	0
Cd300a	5.78501	7.84999	1542.48	0	0
Adam15	5.77904	6.54022	1503.98	0	0
Ahnak2	5.73726	4.70551	1103.81	4.8997e-242	2.44347e-240
Pparg	5.72504	5.02182	1233.39	3.38509e-270	2.05764e-268
Dok2	5.72075	7.52856	1553.08	0	0
Bag3	5.7136	5.53576	1112.26	7.13264e-244	3.71396e-242
Fam167a	5.69336	6.67728	1196.56	3.40524e-262	1.97657e-260
1700001K19Rik	5.68661	7.39123	1586.09	0	0
Rhoc	5.62894	6.5862	1249.67	9.78365e-274	6.07745e-272
Ms4a6c	5.6192	6.77529	1196.71	3.16623e-262	1.8454e-260
Itfg3	5.59575	7.05063	1250.32	7.05933e-274	4.40446e-272
Mt1	5.52128	9.74196	1376.75	2.37386e-301	1.78835e-299
Csf1r	5.51568	10.2504	1469.69	1.51184087627421e-321	1.33827561489018e-319
Arhgap31	5.50699	4.39402	964.251	1.0591e-211	4.15514e-210
Pex11a	5.45126	4.51998	1018.01	2.18548e-223	9.29519e-222
Stom	5.4245	6.12114	1345.98	1.15256e-294	8.20289e-293
Pld2	5.40912	5.78208	1361.06	6.07871e-298	4.484e-296
5730409E04Rik	5.39306	3.58743	1047.88	7.02436e-230	3.12849e-228
Serpinb6a	5.39282	6.55188	1403.84	3.07199e-307	2.41714e-305
Gm15433	5.37639	5.24549	1154.56	4.58207e-253	2.53499e-251
Alcam	5.36804	6.67415	1253.52	1.42518e-274	8.97105e-273
Hpse	5.36784	7.38209	725.723	7.62358e-160	2.0804e-158
Etv1	5.35479	4.65479	1199.32	8.55432e-263	5.0064e-261
Rarg	5.34542	4.25639	67.5062	2.10028e-16	6.48914e-16
Il6ra	5.3301	5.9588	1180.77	9.22031e-259	5.24447e-257
Frrs1	5.32252	6.40562	1224.05	3.61173e-268	2.17672e-266
S1pr2	5.30755	4.35111	988.139	6.80023e-217	2.81613e-215
Csprs	5.30385	5.729	1110.56	1.67149e-243	8.67156e-242
Pld1	5.29967	3.60428	943.412	3.58822e-207	1.36613e-205
Rxra	5.28696	7.31575	1423.77	1.43564909158106e-311	0
Parp12	5.2824	3.62959	878.845	3.89743e-193	1.36294e-191
Rnase4	5.24691	6.68035	1237.01	5.53052e-271	3.39086e-269
Tmem140	5.23959	7.11395	1093.89	7.02757e-240	3.42032e-238
Naprt	5.22961	4.36878	1078.92	1.25821e-236	5.94001e-235
Il11ra1	5.22781	6.93933	1029.4	7.31702e-226	3.14988e-224
Dfna5	5.21855	4.93244	1151.05	2.65768e-252	1.44772e-250
Tbc1d9	5.21128	3.20007	852.86	1.737e-187	5.89954e-186
Gamt	5.16905	5.13795	972.114	2.06901e-213	8.27778e-212
Serpinb6c	5.15879	9.05007	1466.56	7.23806171157426e-321	6.28910982560698e-319
Mitf	5.1405	6.20967	790.215	7.23721e-174	2.19487e-172
Cmtm3	5.13853	6.93568	1145.81	3.64361e-251	1.97718e-249
Ifi44	5.13803	7.11492	1381.98	1.73056e-302	1.31069e-300
Ptges3l	5.13393	4.65405	777.368	4.49605e-171	1.33776e-169
Gm14488	5.12921	4.82709	568.678	1.08856e-125	2.2507e-124
Tubb2a	5.11438	8.21607	1467.24	5.1531046861242e-321	4.50513759160341e-319
Dnajb14	5.11304	3.19275	749.992	4.02759e-165	1.13631e-163
Dbndd2	5.11104	6.41974	1291.49	8.00962e-283	5.30094e-281
Zfp467	5.10382	3.75615	1021.54	3.73989e-224	1.60024e-222
Mpzl1	5.09876	4.6624	1037.67	1.16464e-227	5.09098e-226
Anxa4	5.08762	8.17907	1160.36	2.51956e-254	1.39939e-252
Lipa	5.06428	8.25021	1398.78	3.86147e-306	2.97228e-304
Rin2	5.02317	6.35629	977.801	1.20083e-214	4.91542e-213
Plbd1	5.01725	8.4982	1263.62	9.11644e-277	5.76411e-275
Atp8b4	5.01055	3.73635	974.452	6.42094e-214	2.59828e-212
Lgmn	5.00648	10.4111	1133.2	2.00509e-248	1.0676e-246
C130050O18Rik	5.00093	4.17489	663.287	2.88097e-146	7.18366e-145
Hbegf	4.9815	3.35906	807.811	1.08089e-177	3.38686e-176
Nek6	4.95527	5.58499	1109.61	2.69294e-243	1.38189e-241
Slc15a3	4.9428	6.68754	818.195	5.9727e-180	1.93573e-178
Cd300c	4.93353	3.03319	684.206	8.13295e-151	2.09812e-149
Tnfrsf23	4.91314	4.44319	749.96	4.09341e-165	1.15258e-163
Ifitm7	4.88146	9.34662	893.749	2.24255e-196	7.96022e-195
Lat2	4.86287	5.67312	1132.43	2.95994e-248	1.5701e-246
Pea15a	4.85198	6.12101	1076.42	4.40833e-236	2.06739e-234
Amz1	4.84253	4.98687	1013.6	1.98632e-222	8.3727e-221
Dusp3	4.81474	7.49217	1236.09	8.73276e-271	5.33112e-269
Cers6	4.81163	6.63784	929.314	4.16231e-204	1.55134e-202
Plxnc1	4.81145	4.79796	973.016	1.31749e-213	5.28601e-212
Ctnnd1	4.80996	5.8427	929.402	3.98437e-204	1.48894e-202
Creg1	4.8003	8.07864	1007.27	4.71166e-221	1.98016e-219
Dock1	4.79724	4.68609	1054.43	2.65123e-231	1.19204e-229
Slc16a3	4.79216	7.59603	1074.26	1.29695e-235	6.02253e-234
Snx21	4.78646	4.22497	934.933	2.49963e-205	9.44059e-204
Ptms	4.77759	3.71926	815.287	2.56172e-179	8.18999e-178
Anxa5	4.71243	8.70123	1083.78	1.10677e-237	5.31364e-236
Il18	4.69264	5.1983	973.525	1.02117e-213	4.10878e-212
Paqr7	4.65903	4.53811	1032.85	1.29897e-226	5.60894e-225
Dnase1l1	4.62578	7.19778	1180.75	9.29053e-259	5.26327e-257
Rasgef1b	4.6175	6.32153	104.549	1.5335e-24	6.2143e-24
Nceh1	4.61436	8.37496	740.681	4.26254e-163	1.18142e-161
5730416F02Rik	4.60994	6.62396	1164.73	2.82714e-255	1.57641e-253
Pld3	4.60691	7.85759	1142.09	2.34393e-250	1.26225e-248
Slc35f6	4.58731	5.65964	990.155	2.47881e-217	1.02954e-215
Dpp7	4.56674	8.06946	1188.25	2.18444e-260	1.25256e-258
Raph1	4.56485	4.04651	851.547	3.35087e-187	1.13537e-185
Dhrs3	4.56454	9.76847	1220.74	1.8979e-267	1.13898e-265
Cyp4v3	4.55983	5.15023	846.483	4.22744e-186	1.41544e-184
Tnfrsf11a	4.55681	5.37037	908.676	1.27575e-199	4.63295e-198
Id2	4.532	8.03723	1094.56	5.01524e-240	2.44934e-238
Plxnb2	4.5313	7.65061	964.186	1.09396e-211	4.28004e-210
Soat1	4.52962	4.56586	867.972	9.00495e-191	3.10309e-189
Rap2a	4.50805	5.51878	1083.51	1.26826e-237	6.06839e-236
Cdk20	4.50608	4.31039	817.021	1.07488e-179	3.47568e-178
Evi2a	4.50149	7.70729	1072.32	3.43659e-235	1.58542e-233
1700026L06Rik	4.49901	5.64842	1042.64	9.682e-229	4.28519e-227
Anxa1	4.49502	9.94896	707.751	6.16918e-156	1.64237e-154
Naip2	4.45387	4.81091	394.442	8.93072e-88	1.16469e-86
Tspan4	4.44918	7.56863	1228.12	4.7144e-269	2.85342e-267
Avpi1	4.42894	4.62798	977.765	1.22266e-214	4.99036e-213
Slc26a11	4.40085	3.65927	808.509	7.62276e-178	2.39382e-176
Lima1	4.35375	5.0102	898.942	1.66654e-197	5.96041e-196
Oas1f	4.34525	8.09602	1088.98	8.2196e-239	3.98679e-237
Hebp2	4.34352	3.71779	795.27	5.75998e-175	1.76577e-173
Gpr146	4.3394	6.15114	1096.48	1.92549e-240	9.50198e-239
Apobec1	4.30715	5.18673	816.574	1.3445e-179	4.31796e-178
Slc41a3	4.29435	3.46448	741.575	2.72442e-163	7.58073e-162
Capg	4.28865	10.1232	991.664	1.16455e-217	4.85105e-216
Oas1a	4.27635	9.21307	749.84	4.34796e-165	1.22183e-163
Mdfic	4.24498	5.57974	678.301	1.56432e-149	3.97763e-148
Ak1	4.19086	3.1153	711.021	1.1996e-156	3.21172e-155
9530083O12Rik	4.1843	9.90407	754.077	5.21201e-166	1.48228e-164
Egr2	4.10481	7.44495	793.184	1.63678e-174	4.99605e-173
Timp1	4.1033	3.11527	640.095	3.1864e-141	7.59748e-140
F5	4.09674	3.32192	562.12	2.90686e-124	5.92372e-123
Rab32	4.08245	6.59308	931	1.79009e-204	6.70715e-203
Tmem65	4.05838	3.90051	495.293	1.00485e-109	1.71672e-108
Lmo2	4.04093	3.43895	719.166	2.03223e-158	5.51388e-157
Akr1b8	4.0325	6.66467	782.601	3.27304e-172	9.86298e-171
Ctsz	4.02966	9.90584	1061.67	7.07555e-233	3.22222e-231
Snx7	4.02742	3.88668	781.801	4.88582e-172	1.46606e-170
Cd80	3.97647	3.40569	641.719	1.41259e-141	3.39094e-140
AI413582	3.97553	8.06356	964.427	9.69943e-212	3.81592e-210
Scpep1	3.95731	6.80641	681.699	2.85338e-150	7.30784e-149
Fam129a	3.94726	4.04587	374.685	1.7872e-83	2.19152e-82
Clstn3	3.90118	3.52651	519.735	4.83347e-115	8.83308e-114
Alox5ap	3.89885	7.63926	933.942	4.10638e-205	1.54677e-203
Bst2	3.89592	8.10207	935.237	2.14773e-205	8.13325e-204
Emc9	3.85883	5.35335	774.675	1.73093e-170	5.10732e-169
Acer3	3.85103	5.51447	765.402	1.79648e-168	5.20318e-167
Sepn1	3.83873	4.69793	595.852	1.33678e-131	2.94905e-130
Abcc1	3.82207	3.93475	764.137	3.38515e-168	9.78447e-167
Pros1	3.82139	5.37106	715.966	1.00898e-157	2.72195e-156
Hyal1	3.77747	4.79562	636.601	1.83272e-140	4.35518e-139
Xylt2	3.77329	6.8714	697.711	9.40608e-154	2.4579e-152
Atxn1	3.76933	4.88094	634.568	5.07325e-140	1.19555e-138
Aifm2	3.76746	5.75944	672.199	3.32163e-148	8.38579e-147
Kif1b	3.76056	5.22634	746.637	2.16043e-164	6.04708e-163
Pwwp2b	3.75696	5.5239	769.637	2.15568e-169	6.26917e-168
Slc31a2	3.75293	3.32326	168.528	1.55157e-38	9.05806e-38
Sgpl1	3.72366	8.27148	794.919	6.86694e-175	2.10057e-173
Pla2g15	3.72072	6.48862	728.934	1.52726e-160	4.19196e-159
Paqr4	3.71884	3.52372	602.972	3.77964e-133	8.44338e-132
Slc37a2	3.70741	5.47858	820.393	1.98739e-180	6.47068e-179
Ftl1	3.69952	10.5666	800.781	3.6494e-176	1.12852e-174
Rnf149	3.69217	7.48884	669.091	1.57482e-147	3.94765e-146
Dusp7	3.68961	6.27306	809.728	4.1402e-178	1.3118e-176
Naaa	3.67506	6.65918	776.155	8.25042e-171	2.4497e-169
Saraf	3.66563	8.43122	515.993	3.14987e-114	5.683e-113
Clcn5	3.65963	4.63124	780.046	1.1762e-171	3.51601e-170
Ifi44l	3.65176	5.46982	772.269	5.77278e-170	1.68925e-168
Slc16a6	3.65132	6.53939	833.33	3.06e-183	1.00554e-181
Etv5	3.65095	6.69961	835.489	1.0382e-183	3.42752e-182
Cdc42ep4	3.64513	4.50925	656.678	7.88325e-145	1.94175e-143
Nagk	3.64032	5.09125	697.035	1.31975e-153	3.44228e-152
Ifitm1	3.63925	9.22197	809.529	4.57504e-178	1.44312e-176
Plxna1	3.63697	4.66654	502.172	3.20171e-111	5.54351e-110
Degs1	3.62159	7.74641	846.289	4.65914e-186	1.55631e-184
Abhd4	3.61843	7.48593	871.934	1.23937e-191	4.30224e-190
Adcy9	3.61049	4.20794	632.386	1.51285e-139	3.55922e-138
Gusb	3.60827	8.30381	662.154	5.07925e-146	1.26428e-144
Cd84	3.59414	6.70452	631.81	2.01948e-139	4.73541e-138
Ski	3.59333	5.4084	771.572	8.18245e-170	2.38453e-168
Zfp516	3.55631	3.79632	569.791	6.23493e-126	1.2929e-124
Uap1l1	3.55074	7.05445	610.959	6.92203e-135	1.56358e-133
Naglu	3.5439	9.16617	807.21	1.46045e-177	4.55601e-176
Nipa1	3.54342	4.3304	504.852	8.36144e-112	1.47109e-110
Tns1	3.523	4.80089	459.367	6.60006e-102	1.04327e-100
Antxr2	3.51594	5.92653	665.072	1.17851e-146	2.94379e-145
Gpr137b-ps	3.51174	5.61838	781.853	4.75924e-172	1.43111e-170
Adam9	3.50768	7.00602	688.443	9.74562e-152	2.52335e-150
Cstb	3.49784	9.00848	761.253	1.43446e-167	4.13773e-166
Gsn	3.49545	7.94214	728.022	2.4112e-160	6.60538e-159
Ggh	3.49414	6.00885	618.576	1.52565e-136	3.4964e-135
1110007C09Rik	3.48286	7.87882	612.622	3.00954e-135	6.83078e-134
Slc35e4	3.48194	5.15446	709.979	2.02174e-156	5.40263e-155
Crtap	3.48067	6.80787	642.356	1.02715e-141	2.47407e-140
Ckap4	3.47781	3.45098	480.303	1.83619e-106	3.031e-105
Lst1	3.46518	7.66091	523.078	9.05483e-116	1.66767e-114
Il10rb	3.46192	8.27544	718.572	2.73673e-158	7.41114e-157
Ctss	3.46005	11.2261	626.511	2.86814e-138	6.65926e-137
Atf5	3.46003	7.33383	741.03	3.57941e-163	9.94023e-162
Copz2	3.45706	4.50684	541.927	7.18183e-120	1.39912e-118
Rnf144b	3.45395	5.3083	585.208	2.76253e-129	5.89243e-128
Atxn7	3.45313	10.7125	669.451	1.31552e-147	3.30936e-146
Nfatc2	3.45214	4.87356	489.165	2.16507e-108	3.62887e-107
Fryl	3.45068	10.2858	509.607	7.72304e-113	1.37242e-111
Slc6a6	3.44941	3.56275	590.606	1.84976e-130	4.01811e-129
Ank	3.44597	3.06464	587.428	9.08713e-130	1.95001e-128
Akr1c12	3.43853	3.96822	583.407	6.80861e-129	1.45008e-127
Asah1	3.4376	5.63065	545.612	1.13384e-120	2.22727e-119
Psap	3.43755	10.5711	343.585	1.05719e-76	1.17898e-75
1700110I01Rik	3.43531	9.77702	566.723	2.89825e-125	5.95762e-124
Cln3	3.43279	5.14584	530.422	2.28577e-117	4.31644e-116
Tmem8	3.42792	3.20863	528.116	7.25963e-117	1.36364e-115
Renbp	3.41823	5.26879	531.652	1.23496e-117	2.33521e-116
Arrb1	3.40927	6.11622	759.912	2.8062e-167	8.06169e-166
Nlgn2	3.40747	3.07699	404.334	6.27315e-90	8.46158e-89
A530006G24Rik	3.4039	9.68774	523.331	7.97846e-116	1.47326e-114
Ropn1l	3.39902	4.62827	615.109	8.66238e-136	1.97243e-134
Ifi27l2a	3.39856	3.48715	507.18	2.60478e-112	4.6172e-111
Akr1c13	3.3768	5.50644	717.512	4.65143e-158	1.25722e-156
Klf6	3.36018	8.41618	625.727	4.24696e-138	9.84446e-137
Peak1	3.35909	5.45002	580.48	2.949e-128	6.26263e-127
Spred1	3.35701	5.4918	521.73	1.7787e-115	3.25895e-114
Egr1	3.3457	7.73564	700.091	2.85711e-154	7.50746e-153
Slc30a1	3.33704	3.5183	561.25	4.49406e-124	9.10579e-123
Kif3a	3.33004	7.32994	635.769	2.78014e-140	6.58446e-139
Hgsnat	3.32603	4.4883	573.579	9.3477e-127	1.96718e-125
Serpinb8	3.32098	10.2355	468.686	6.18974e-104	1.00189e-102
Slc35d2	3.31778	3.98817	587.291	9.73011e-130	2.08484e-128
Golt1a	3.30845	6.02028	410.555	2.77555e-91	3.82394e-90
Igsf9	3.29119	10.0783	463.968	6.58192e-103	1.05452e-101
Ebi3	3.28622	6.9139	556.699	4.39328e-123	8.82583e-122
Grn	3.2858	7.72502	640.566	2.51716e-141	6.02206e-140
Appl2	3.28484	3.61434	481.447	1.03481e-106	1.71215e-105
Fbxw4	3.26334	5.18395	647.741	6.92476e-143	1.68514e-141
Dram2	3.26036	5.50288	657.724	4.67002e-145	1.1543e-143
4632428N05Rik	3.25256	6.08347	623.417	1.35055e-137	3.12037e-136
Fabp5	3.25198	11.2675	533.31	5.38066e-118	1.02153e-116
Gm10405	3.2254	10.1882	540.842	1.23688e-119	2.40301e-118
Litaf	3.21678	5.28785	647.278	8.7318e-143	2.12124e-141
Ubtd1	3.21025	4.49937	407.562	1.24407e-90	1.69421e-89
Tlr1	3.20924	5.05134	554.649	1.22665e-122	2.44691e-121
Arhgap6	3.20892	3.84246	399.236	8.07832e-89	1.06828e-87
Znfx1	3.20477	7.78263	593.255	4.90855e-131	1.07449e-129
Jdp2	3.2017	3.22841	514.327	7.25854e-114	1.30626e-112
Cndp2	3.20009	7.18368	529.978	2.85553e-117	5.3852e-116
Arl11	3.19764	3.63777	533.778	4.25634e-118	8.10249e-117
Srgap2	3.1933	8.7165	328.89	1.67744e-73	1.7836e-72
Pdxk	3.18658	4.75438	547.586	4.21836e-121	8.29787e-120
Actg1	3.18507	8.15234	512.968	1.43399e-113	2.56435e-112
Fndc3b	3.17842	3.71797	489.402	1.9227e-108	3.23795e-107
Nenf	3.1725	7.65533	670.388	8.22737e-148	2.07338e-146
Gnpda1	3.16671	8.37073	524.012	5.67241e-116	1.0488e-114
Blvra	3.15871	5.84721	626.584	2.76578e-138	6.43215e-137
Pfkfb4	3.14819	4.60126	573.027	1.23283e-126	2.57911e-125
Ptrh1	3.14249	5.37556	568.144	1.42242e-125	2.93242e-124
Hcst	3.1319	6.60701	648.347	5.11192e-143	1.24788e-141
Slc36a1	3.12901	3.35367	425.664	1.42774e-94	2.07183e-93
Aldoc	3.12734	6.91278	556.286	5.40215e-123	1.08066e-121
Por	3.12357	8.40836	477.851	6.27031e-106	1.03263e-104
Cd151	3.12323	6.23131	567.747	1.73528e-125	3.57221e-124
Fes	3.12088	6.98204	574.777	5.12996e-127	1.08118e-125
Elane	3.11884	4.76244	114.105	1.23602e-26	5.3128e-26
Slfn2	3.11303	7.12626	518.544	8.77661e-115	1.59978e-113
Gstm5	3.10811	5.02578	596.36	1.0362e-131	2.29308e-130
Atp6v0c	3.10658	9.61533	519.344	5.87921e-115	1.07303e-113
Limk1	3.0835	4.6177	592.816	6.11463e-131	1.33644e-129
B4galt5	3.0454	7.45078	580.311	3.20892e-128	6.80358e-127
Dip2a	3.04456	3.35402	501.22	5.15969e-111	8.90094e-110
Myo5a	3.04383	5.43427	435.741	9.14873e-97	1.36825e-95
Abcb1b	3.04028	3.44963	407.966	1.01601e-90	1.38897e-89
Terf2ip	3.0343	10.1472	466.875	1.53376e-103	2.47129e-102
Tlr7	3.02947	6.05348	381.258	6.62374e-85	8.27266e-84
Fxyd5	3.02895	8.82427	459.809	5.29021e-102	8.40911e-101
H2-T24	3.02798	3.92274	237.239	1.57298e-53	1.21938e-52
Cntn6	3.02075	3.92952	429.911	1.69905e-95	2.49882e-94
Zbtb7b	3.01798	4.37202	368.434	4.10381e-82	4.95924e-81
Selenbp1	3.01655	6.49639	611.515	5.23784e-135	1.18504e-133
Efhd2	3.01628	8.57975	631.468	2.39632e-139	5.60977e-138
Acss2	3.01487	4.3787	392.311	2.59899e-87	3.36775e-86
Rnh1	3.00304	6.51314	430.232	1.4465e-95	2.13181e-94
Ankrd24	3.00245	4.53494	293.949	6.85713e-66	6.57088e-65
Plin2	2.99895	4.44761	422.723	6.23533e-94	8.97469e-93
Gprc5b	2.99712	3.82922	407.778	1.11646e-90	1.52335e-89
Zfp791	2.98184	9.50715	320.138	1.35157e-71	1.39318e-70
Synpo2l	2.97986	10.4532	504.335	1.08354e-111	1.90163e-110
Clcn7	2.97846	7.50555	566.004	4.15419e-125	8.51459e-124
Cpne2	2.97405	4.91513	489.266	2.05793e-108	3.45337e-107
Itgb2	2.96788	6.75818	434.243	1.9381e-96	2.88939e-95
Il12rb1	2.96754	3.19664	414.991	3.0035e-92	4.18686e-91
Rgs10	2.96162	7.54448	588.161	6.29497e-130	1.35701e-128
Emp3	2.96079	7.55476	523.301	8.0998e-116	1.49372e-114
Lgals1	2.95671	10.4118	573.187	1.13766e-126	2.38352e-125
Fam63a	2.95143	7.85633	552.974	2.83748e-122	5.64427e-121
Gng12	2.95133	5.71044	503.626	1.54531e-111	2.70869e-110
Itm2c	2.95011	8.97098	459.458	6.30669e-102	9.99123e-101
Trex1	2.94262	8.55424	556.656	4.48759e-123	9.00252e-122
Osbpl8	2.94237	7.0307	612.042	4.02326e-135	9.11702e-134
Selm	2.94212	5.02135	426.991	7.3428e-95	1.06992e-93
Krt85	2.9386	5.15459	358.311	6.56739e-80	7.72541e-79
Ssh3	2.93748	5.72485	503.599	1.56606e-111	2.73828e-110
Dnaaf3	2.93242	3.03236	397.363	2.06578e-88	2.72164e-87
2021-03-08	2.93104	6.02078	569.047	9.0509e-126	1.87409e-124
Cables1	2.92914	4.45492	398.474	1.18314e-88	1.56168e-87
Ubash3b	2.92379	5.91585	460.452	3.83311e-102	6.10668e-101
Slc46a3	2.91873	4.54869	457.299	1.86096e-101	2.92528e-100
Cmpk2	2.91655	4.3868	477.193	8.71953e-106	1.43099e-104
Ncf1	2.90222	3.66003	396.429	3.29763e-88	4.33652e-87
Mir22hg	2.90212	3.59136	270.354	9.50297e-61	8.35966e-60
Nod1	2.90112	4.29564	483.936	2.97332e-107	4.94842e-106
Tm7sf2	2.89771	5.24667	522.191	1.41218e-115	2.59077e-114
Naip6	2.89632	3.7091	448.175	1.79969e-99	2.75557e-98
Btn1a1	2.8868	10.3529	424.076	3.16463e-94	4.56888e-93
Necap1	2.88074	5.79818	526.741	1.44506e-116	2.70006e-115
I730030J21Rik	2.8767	10.5014	374.564	1.89912e-83	2.32676e-82
Klf3	2.8767	5.91324	488.434	3.12226e-108	5.20855e-107
Slc39a11	2.87653	5.54579	550.056	1.22421e-121	2.43176e-120
Tcirg1	2.87636	8.98463	569.838	6.08961e-126	1.26462e-124
Cd9	2.86835	7.33915	493.994	1.92625e-109	3.28297e-108
Nqo2	2.85971	6.40709	502.606	2.57653e-111	4.47747e-110
Sestd1	2.85604	4.11176	469.588	3.93887e-104	6.39018e-103
Abhd12	2.85518	4.64116	441.66	4.7114e-98	7.10623e-97
Tor3a	2.8534	6.06968	544.751	1.74553e-120	3.4241e-119
Tnfaip8l2	2.85274	5.81191	493.373	2.62984e-109	4.466e-108
Ssfa2	2.84736	5.12011	498.882	1.66449e-110	2.86094e-109
Amdhd2	2.84438	8.10151	593.459	4.43114e-131	9.72995e-130
S100a11	2.82811	6.92965	267.435	4.11167e-60	3.5814e-59
Gm10576	2.82612	10.1057	324.617	1.42983e-72	1.49783e-71
Mfsd1	2.82402	8.14017	401	3.33607e-89	4.42819e-88
Plekhg3	2.8219	10.7532	427.868	4.73066e-95	6.93585e-94
Gyg	2.81979	8.61418	456.105	3.38449e-101	5.27914e-100
Arrb2	2.81947	5.11689	430.212	1.46137e-95	2.15149e-94
Prrg2	2.81226	4.9348	493.85	2.07022e-109	3.5241e-108
Gaa	2.80994	6.84777	528.246	6.80215e-117	1.2794e-115
Atp7a	2.80866	5.35083	421.87	9.56024e-94	1.36908e-92
Tpp1	2.80786	9.02878	465.616	2.88207e-103	4.62274e-102
Rgl1	2.80781	6.56705	533.504	4.88213e-118	9.2813e-117
Wdr89	2.79956	10.4747	402.49	1.58079e-89	2.11016e-88
Slc25a24	2.79846	5.56288	516.217	2.81619e-114	5.08746e-113
Sh3bp2	2.79144	6.19278	443.249	2.12455e-98	3.21132e-97
Chst14	2.79026	5.11916	389.027	1.34813e-86	1.72793e-85
Hk2	2.78886	4.99131	456.392	2.93182e-101	4.57811e-100
Ralb	2.78753	6.85532	517.857	1.23805e-114	2.24514e-113
Cotl1	2.77819	10.2586	497.999	2.58998e-110	4.44629e-109
Ehd4	2.77714	8.34253	449.577	8.91571e-100	1.36956e-98
Hnrnpll	2.77639	5.28995	456.908	2.26363e-101	3.54643e-100
Zyx	2.77473	7.53835	456.754	2.44535e-101	3.82268e-100
Nhlrc3	2.7708	3.42488	402.745	1.39141e-89	1.86262e-88
Tecpr1	2.76956	7.91229	452.579	1.98081e-100	3.07275e-99
Spsb2	2.76659	6.93282	542.13	6.48734e-120	1.26557e-118
Plod3	2.76096	6.39279	412.9	8.56888e-92	1.18981e-90
Ctsb	2.75715	11.3069	347.622	1.39643e-77	1.58221e-76
Idh1	2.74991	4.03734	443.937	1.50507e-98	2.27981e-97
Gba	2.73209	6.33305	479.637	2.56331e-106	4.22632e-105
Taf12	2.72869	4.6198	454.722	6.76734e-101	1.05209e-99
Man2b2	2.72713	4.48517	301.885	1.27965e-67	1.25423e-66
Gm6994	2.72095	10.1303	383.822	1.83164e-85	2.31828e-84
Fam214b	2.70439	4.52765	407.303	1.41641e-90	1.92706e-89
Mfhas1	2.70176	6.01424	450.75	4.95356e-100	7.63409e-99
Adap1	2.70032	6.90846	481.753	8.87811e-107	1.47237e-105
Atp6v1a	2.69838	8.03663	436.786	5.41847e-97	8.12083e-96
Synj1	2.69064	5.64019	328.32	2.2325e-73	2.37023e-72
Emp1	2.69019	8.62192	397.748	1.70267e-88	2.24533e-87
Ndrg1	2.67658	9.02391	344.254	7.55793e-77	8.46859e-76
Fez2	2.67396	6.08783	442.498	3.09584e-98	4.67446e-97
Uhrf1bp1	2.66497	4.11436	417.636	7.97996e-93	1.12235e-91
Milr1	2.66233	3.99709	364.427	3.05874e-81	3.66195e-80
Tmem189	2.66033	4.75558	448.625	1.43631e-99	2.20396e-98
Pqlc2	2.65239	4.62251	327.828	2.8568e-73	3.02624e-72
Gns	2.64707	8.05851	412.727	9.34206e-92	1.29463e-90
Sumf1	2.64162	6.07973	473.926	4.48069e-105	7.31949e-104
Rab3d	2.63791	4.70711	405.871	2.90409e-90	3.93218e-89
Ifnar2	2.63177	7.00828	489.881	1.51232e-108	2.54988e-107
Gstm3	2.62261	7.59347	329.043	1.55353e-73	1.65434e-72
Pnpla7	2.61824	4.73071	402.113	1.9097e-89	2.54442e-88
Aplp2	2.61452	8.50296	391.57	3.76776e-87	4.86443e-86
Socs6	2.60954	4.31103	350.451	3.38027e-78	3.87024e-77
Phf11b	2.6093	6.68162	422.421	7.25131e-94	1.04264e-92
Plekhm2	2.59996	7.51622	418.916	4.20079e-93	5.9615e-92
Tmem239	2.59412	10.8009	353.497	7.33814e-79	8.50491e-78
Plec	2.59194	3.48623	375.341	1.28624e-83	1.58271e-82
Pacs2	2.59106	4.99311	432.993	3.62694e-96	5.39584e-95
Cnnm2	2.5903	3.50356	346.116	2.97105e-77	3.34491e-76
Capn2	2.58976	7.68472	471.273	1.6932e-104	2.75641e-103
Tlr4	2.58498	5.52409	389.796	9.16993e-87	1.17746e-85
Twf1	2.58219	5.8047	379.843	1.34614e-84	1.6724e-83
Rhox4g	2.5801	10.1984	290.862	3.2259e-65	3.05403e-64
Zbp1	2.57913	6.66926	434.749	1.50398e-96	2.24455e-95
Tpd52	2.57553	5.31744	324.72	1.358e-72	1.4247e-71
Grina	2.57324	6.13935	404.946	4.61593e-90	6.23216e-89
Man2b1	2.57215	8.30147	459.724	5.52023e-102	8.76491e-101
Slc25a13	2.57122	4.47136	423.67	3.87837e-94	5.59362e-93
Rcbtb2	2.56924	7.20675	416.956	1.12185e-92	1.57315e-91
Tmem68	2.56832	4.27151	369.437	2.48247e-82	3.00507e-81
Dhx58	2.56477	4.66792	385.94	6.33357e-86	8.0813e-85
Zfp703	2.56303	8.22309	462.982	1.07899e-102	1.72286e-101
Tcn2	2.56269	8.63768	310.595	1.6204e-69	1.63111e-68
Nkain1	2.5585	3.83119	337.432	2.31307e-75	2.52583e-74
Tmem205	2.55804	6.6035	455.38	4.86723e-101	7.58357e-100
Kcnn4	2.55665	6.58479	402.454	1.6099e-89	2.14698e-88
Zdhhc9	2.55484	6.69234	384.405	1.36752e-85	1.73551e-84
Tspan17	2.55377	3.03279	332.88	2.26746e-74	2.44214e-73
Arsk	2.55159	3.02122	375.443	1.22238e-83	1.50544e-82
Nrp2	2.54813	10.6873	354.563	4.30128e-79	4.99746e-78
Gstm1	2.5481	5.39767	338.323	1.47958e-75	1.62318e-74
Slc38a7	2.53888	3.26168	235.7	3.40694e-53	2.62384e-52
Gpr137b	2.53629	5.99309	456.796	2.39421e-101	3.74686e-100
Plxnd1	2.53029	6.77816	421.627	1.07946e-93	1.54428e-92
Pdp1	2.52589	4.17112	364.947	2.35686e-81	2.82883e-80
Ctsc	2.52519	8.31646	459.721	5.52872e-102	8.76857e-101
Aig1	2.52122	3.90785	301.609	1.46966e-67	1.43649e-66
Sdcbp	2.51798	7.73112	256.954	7.91625e-58	6.63027e-57
Tom1	2.515	7.11018	424.982	2.00931e-94	2.90981e-93
Atp2b1	2.51481	5.0931	354.444	4.5657e-79	5.29599e-78
Dusp1	2.51171	7.59966	383.982	1.69028e-85	2.14319e-84
Cyba	2.50979	10.3309	420.52	1.88049e-93	2.68211e-92
Impact	2.50969	4.39253	352.241	1.37753e-78	1.58618e-77
Siae	2.50626	4.73633	341.687	2.73794e-76	3.02241e-75
Hs1bp3	2.5059	5.78443	400.515	4.2544e-89	5.64186e-88
Rras	2.49998	5.47181	417.329	9.30848e-93	1.3079e-91
Mafg	2.49847	5.28754	344.394	7.04527e-77	7.90667e-76
Kctd11	2.49537	3.92494	306.913	1.02734e-68	1.01964e-67
Glb1	2.4913	7.7868	418.629	4.85245e-93	6.87252e-92
Comtd1	2.48477	6.39141	313.442	3.88587e-70	3.93673e-69
G6pdx	2.48417	7.08279	361.273	1.48713e-80	1.76253e-79
Ephb3	2.48328	10.709	316.315	9.19651e-71	9.41114e-70
Wdfy2	2.47577	6.27231	402.907	1.28282e-89	1.71889e-88
Rap2b	2.47468	3.10345	353.069	9.09435e-79	1.04889e-77
Hyal2	2.47461	5.80243	170.642	5.3563e-39	3.15694e-38
C030009H01Rik	2.47429	6.00336	215.133	1.04246e-48	7.40068e-48
N6amt2	2.47249	5.13595	245.353	2.67658e-55	2.14536e-54
Rnasel	2.47234	7.29646	421.933	9.26385e-94	1.32797e-92
Nptn	2.4688	3.2103	324.447	1.55668e-72	1.62951e-71
Ldlrad3	2.45724	10.7451	343.236	1.25964e-76	1.40033e-75
Tpra1	2.45397	3.97653	296.52	1.88807e-66	1.82282e-65
2310002F09Rik	2.45258	10.1271	284.598	7.47617e-64	6.91156e-63
Atp6ap1	2.44984	6.24923	402.538	1.54336e-89	2.06213e-88
Mcam	2.44751	10.3338	224.362	1.0116e-50	7.47772e-50
Raet1b	2.44541	3.57723	363.696	4.413e-81	5.27437e-80
Blvrb	2.44396	6.98895	427.49	5.71644e-95	8.35521e-94
Ppp1r3b	2.42066	9.68203	195.661	1.84858e-44	1.21718e-43
Dgat2	2.4205	3.22504	39.2532	3.72266e-10	8.78149e-10
Yipf6	2.41939	3.04203	301.185	1.81791e-67	1.77566e-66
Coa5	2.40508	5.55606	315.861	1.15477e-70	1.18002e-69
Itgb1	2.40139	7.82675	383.868	1.79029e-85	2.26797e-84
Kank3	2.39801	3.13662	314.292	2.53729e-70	2.57234e-69
Zfp36	2.39727	7.80199	362.089	9.8774e-81	1.17459e-79
Atp6v1c1	2.39725	5.90018	375.116	1.43956e-83	1.76983e-82
Atp6v1b2	2.39586	8.39919	382.739	3.15217e-85	3.9781e-84
Stx12	2.39567	5.7272	364.485	2.97106e-81	3.55999e-80
Ifi204	2.39435	9.01608	336.187	4.31798e-75	4.68625e-74
Vkorc1	2.39357	4.75561	308.711	4.16871e-69	4.17201e-68
Gm626	2.3905	10.5724	79.3507	5.20074e-19	1.75837e-18
Dtx4	2.38822	3.20464	337.37	2.38639e-75	2.60389e-74
Bri3	2.38497	8.0929	417.894	7.0107e-93	9.89956e-92
Ppt2	2.3828	3.92475	314.935	1.83741e-70	1.8668e-69
Ung	2.37845	10.8446	291.721	2.09663e-65	1.99158e-64
Ninj1	2.37526	9.47518	308.405	4.85962e-69	4.85038e-68
Zmat3	2.3725	3.45463	170.709	5.17917e-39	3.05381e-38
Arhgap10	2.37017	5.71454	262.699	4.42902e-59	3.79481e-58
Sntb2	2.36948	3.20857	224.869	7.84024e-51	5.81368e-50
Ltc4s	2.36859	3.66769	223.5	1.55963e-50	1.14808e-49
Zfand2a	2.36065	6.8084	42.1233	8.56947e-11	2.08467e-10
Hemgn	2.35946	10.8952	296.71	1.71608e-66	1.65904e-65
Camta2	2.35921	6.37369	383.264	2.42267e-85	3.0636e-84
Rasa4	2.35561	5.91817	354.539	4.35323e-79	5.05367e-78
Acox1	2.35517	6.63485	406.164	2.50635e-90	3.39688e-89
Prkx	2.35314	5.85992	379.341	1.73175e-84	2.14959e-83
Furin	2.34985	7.49089	303.259	6.42378e-68	6.32685e-67
Pepd	2.34949	7.26578	366.754	9.52928e-82	1.1496e-80
Mthfs	2.34115	4.59816	351.673	1.83118e-78	2.10511e-77
Naa20	2.33845	6.55597	344.12	8.08238e-77	9.04907e-76
Notch2	2.33142	4.72981	325.603	8.72075e-73	9.17623e-72
Glmp	2.32885	5.96532	358.071	7.40562e-80	8.697e-79
Arl8a	2.32234	6.4848	320.008	1.44232e-71	1.48565e-70
Slc3a2	2.32103	7.76824	333.384	1.7613e-74	1.90131e-73
Sgsh	2.3198	11.2162	259.937	1.77122e-58	1.49587e-57
Spr	2.31965	4.30624	324.117	1.83685e-72	1.91712e-71
Prkar2a	2.31787	5.46863	344.591	6.38268e-77	7.16875e-76
Tnni2	2.31724	4.77096	331.457	4.62975e-74	4.96375e-73
Lrpap1	2.31701	8.21388	388.853	1.47077e-86	1.88341e-85
Glipr1	2.30977	5.46917	301.159	1.842e-67	1.79795e-66
Arl6ip6	2.30864	11.0262	250.632	1.89068e-56	1.54427e-55
4933427D06Rik	2.30469	10.1478	177.206	1.97507e-40	1.19901e-39
Snx8	2.30014	7.03957	389.656	9.83665e-87	1.26192e-85
Gch1	2.2997	7.58627	370.971	1.15012e-82	1.39941e-81
Aga	2.29945	4.54528	343.343	1.19349e-76	1.32784e-75
Pik3r6	2.29554	5.16854	292.121	1.71548e-65	1.63502e-64
Bach1	2.28414	5.29907	278.762	1.39744e-62	1.26385e-61
Rhobtb1	2.28321	4.0385	315.747	1.22247e-70	1.2483e-69
Heatr5a	2.28222	4.51808	344.992	5.2214e-77	5.8691e-76
Leprotl1	2.28027	3.1243	236.331	2.48194e-53	1.91981e-52
Ocrl	2.27997	5.40741	325.289	1.02045e-72	1.07295e-71
Atp6v0b	2.27907	6.56675	264.874	1.48667e-59	1.2831e-58
Stxbp5	2.27904	3.23036	285.177	5.58992e-64	5.17451e-63
Rab8b	2.27844	7.39412	293.714	7.71474e-66	7.38269e-65
Tmem120a	2.27735	5.32202	358.181	7.00981e-80	8.239e-79
Susd6	2.27367	6.08105	289.298	7.07109e-65	6.66763e-64
Tdrd7	2.26968	6.40088	315.214	1.59741e-70	1.62763e-69
Rrbp1	2.2666	4.44987	220.953	5.60448e-50	4.06849e-49
Zfyve21	2.26624	3.3481	308.599	4.40983e-69	4.40765e-68
4931406C07Rik	2.2628	5.11935	330.473	7.58017e-74	8.11473e-73
Rbpj	2.26111	7.01252	326.847	4.67253e-73	4.93123e-72
Hs3st2	2.2596	10.9985	288.34	1.14376e-64	1.0735e-63
2810001A02Rik	2.2482	5.83598	342.187	2.13139e-76	2.36019e-75
Mgst3	2.24001	4.95169	347.267	1.66824e-77	1.88868e-76
Slc37a3	2.23885	4.89241	275.451	7.36138e-62	6.56958e-61
Vim	2.23838	10.0692	353.335	7.96098e-79	9.19669e-78
Pak4	2.23208	11.2686	251.173	1.44087e-56	1.17892e-55
Aldh3a1	2.2287	4.34672	143.496	4.57839e-33	2.35967e-32
Nelfcd	2.21086	10.423	246.5	1.50493e-55	1.21241e-54
Fas	2.20957	3.88385	236.167	2.69422e-53	2.08288e-52
Zswim6	2.19909	4.23575	291.193	2.73265e-65	2.5888e-64
Cpped1	2.19821	5.80123	348.786	7.78889e-78	8.88197e-77
Dag1	2.19755	5.78486	299.356	4.55035e-67	4.42628e-66
Tex264	2.19529	6.83633	279.829	8.18331e-63	7.44382e-62
Mgat4b	2.19302	4.23129	272.26	3.64979e-61	3.22069e-60
Sh3tc1	2.19277	4.65233	254.66	2.50409e-57	2.07886e-56
Mcee	2.18707	5.27549	337.166	2.64292e-75	2.87936e-74
Exosc9	2.18453	9.59175	225.245	6.49046e-51	4.82037e-50
Slc27a1	2.18397	5.05987	261.901	6.60803e-59	5.63792e-58
Acaa1b	2.18395	3.9225	280.024	7.41767e-63	6.76039e-62
Lmbrd1	2.17949	3.92302	256.094	1.21901e-57	1.01737e-56
Nkd2	2.17782	3.99608	284.193	9.16154e-64	8.44758e-63
Irgm2	2.17687	4.71838	287.584	1.67137e-64	1.56558e-63
Rai14	2.17435	4.33706	287.516	1.72934e-64	1.61881e-63
Slc48a1	2.1606	6.74	337.351	2.40891e-75	2.62644e-74
Mvp	2.15596	4.0276	279.887	7.94637e-63	7.23758e-62
Cryl1	2.1555	5.32646	275.688	6.5345e-62	5.84268e-61
Lamtor3	2.15094	8.0624	274.324	1.29549e-61	1.15107e-60
Hpcal1	2.1459	3.69622	217.604	3.01309e-49	2.16292e-48
Laptm4b	2.14285	5.14471	289.053	7.99841e-65	7.53703e-64
Ggta1	2.13796	3.8109	185.36	3.2755e-42	2.07845e-41
Gpr3	2.13718	3.75885	208.281	3.25843e-47	2.25448e-46
Sbno2	2.13514	3.27809	253.435	4.6299e-57	3.81906e-56
Ece1	2.1349	5.83205	298.92	5.66343e-67	5.49768e-66
Stag2	2.13062	4.28055	180.468	3.83017e-41	2.36164e-40
Kctd12b	2.12816	5.17685	200.979	1.27718e-45	8.61369e-45
Vapb	2.12563	7.5627	263.222	3.40573e-59	2.91981e-58
Mthfsl	2.11709	6.16441	315.201	1.60795e-70	1.6372e-69
Neu1	2.11631	8.17341	328.939	1.63636e-73	1.74123e-72
Capza1	2.11497	10.3035	239.368	5.40162e-54	4.22669e-53
Fuca1	2.11236	8.37844	274.305	1.30816e-61	1.16145e-60
Comt	2.10803	7.63183	298.02	8.89702e-67	8.61891e-66
Tmem86a	2.10696	5.73583	241.374	1.97343e-54	1.55276e-53
Slfn10-ps	2.10614	4.58902	262.521	4.84223e-59	4.14634e-58
Ado	2.10044	3.61058	113.3	1.85517e-26	7.9284e-26
Fnip1	2.09874	5.25103	254.563	2.62822e-57	2.18064e-56
Mcoln1	2.09808	6.46171	312.365	6.67016e-70	6.75265e-69
Tlr6	2.09571	4.77866	267.934	3.20045e-60	2.7963e-59
5730508B09Rik	2.09459	3.71377	260.56	1.29576e-58	1.0976e-57
Bscl2	2.09261	3.95982	265.434	1.12222e-59	9.70327e-59
Gsr	2.0855	6.39879	256.342	1.07647e-57	8.98943e-57
Ap1s2	2.08469	5.5468	285.536	4.66885e-64	4.33322e-63
Lamp1	2.0745	11.1247	259.664	2.03154e-58	1.71368e-57
Map7d1	2.07013	8.18003	322.675	3.78566e-72	3.93658e-71
Spryd7	2.06336	4.52788	279.045	1.21282e-62	1.09969e-61
D1Ertd622e	2.06118	6.50772	266.832	5.56277e-60	4.8394e-59
Tnnt1	2.05609	3.35879	230.229	5.31474e-52	4.02527e-51
Tnfsf9	2.05594	3.12174	223.079	1.92643e-50	1.41441e-49
Plekhb2	2.05407	8.26784	250.975	1.59193e-56	1.30176e-55
LOC105244782	2.05301	3.78777	226.118	4.18843e-51	3.11886e-50
Msrb1	2.04847	4.43984	278.769	1.39244e-62	1.26013e-61
Piezo1	2.04826	6.99526	308.71	4.17113e-69	4.17201e-68
Sulf2	2.04807	4.06853	223.61	1.4754e-50	1.08721e-49
Ddhd2	2.04677	4.55391	240.862	2.55183e-54	2.00675e-53
Lpxn	2.04439	6.55124	277.143	3.14842e-62	2.83118e-61
Slc29a3	2.04006	3.80093	222.245	2.92943e-50	2.14195e-49
Aldh3b1	2.03787	8.08121	295.016	4.0152e-66	3.85541e-65
Diap2	2.03266	5.30834	269.089	1.7926e-60	1.56913e-59
Aprt	2.03248	4.81509	249.543	3.26693e-56	2.66223e-55
Mov10	2.03126	5.7268	295.732	2.80299e-66	2.69876e-65
Lmbrd2	2.02903	3.99144	271.172	6.30093e-61	5.55667e-60
Soga1	2.02849	3.09997	202.744	5.25952e-46	3.57612e-45
Batf	2.02306	5.50877	247.795	7.85335e-56	6.35583e-55
Itm2b	2.02012	9.50828	308.914	3.7651e-69	3.77389e-68
Ggcx	2.01669	3.16603	186.374	1.96754e-42	1.25298e-41
Tnip2	2.00383	4.41977	261.535	7.94221e-59	6.76401e-58
Aco1	2.00286	5.22835	256.626	9.33433e-58	7.79954e-57
Ergic1	2.00236	3.09422	187.939	8.95685e-43	5.72454e-42
Slc31a1	2.0003	6.16874	291.924	1.89342e-65	1.80218e-64
Elovl1	1.99901	9.00609	252.872	6.14296e-57	5.06124e-56
Hsd17b12	1.99094	5.49041	234.626	5.84064e-53	4.49083e-52
Nampt	1.98784	5.57188	221.574	4.10167e-50	2.98827e-49
Trim30a	1.98771	6.37693	189.5	4.0881e-43	2.63061e-42
Slfn9	1.98048	5.84958	260.251	1.51296e-58	1.28005e-57
Pstpip1	1.9763	4.87932	254.177	3.19091e-57	2.64286e-56
Gpx1	1.97331	10.5423	280.961	4.63687e-63	4.23964e-62
Nmnat3	1.97116	4.04294	201.941	7.87418e-46	5.33343e-45
Gna14	1.96503	3.18653	135.581	2.4637e-31	1.20906e-30
Sft2d1	1.96229	5.29117	267.164	4.71074e-60	4.10069e-59
Fam84b	1.96172	3.21085	237.666	1.26979e-53	9.87589e-53
Ncoa4	1.96118	7.97145	162.105	3.92473e-37	2.22968e-36
Colec12	1.96059	6.8699	228.745	1.11968e-51	8.43065e-51
Ly9	1.95348	4.42547	103.05	3.26715e-24	1.31047e-23
Dcxr	1.95202	4.08546	79.8203	4.10053e-19	1.3907e-18
Wdr91	1.9467	5.44032	276.758	3.81998e-62	3.4242e-61
Aaed1	1.94569	3.07589	205.365	1.40954e-46	9.65345e-46
Il3ra	1.93827	6.08303	241.389	1.95786e-54	1.54137e-53
Nol4l	1.93666	3.18811	182.864	1.14846e-41	7.19398e-41
Rps6ka4	1.93287	4.78674	221.461	4.34189e-50	3.16165e-49
Tmem180	1.92881	4.74351	183.787	7.22049e-42	4.5491e-41
LOC102641578	1.92337	3.84644	230.227	5.319e-52	4.02635e-51
Aldoa	1.92236	10.9857	263.945	2.36988e-59	2.03669e-58
Eif2ak2	1.92139	5.25689	170.134	6.91833e-39	4.06912e-38
Arsa	1.92006	6.2069	260.553	1.30029e-58	1.10077e-57
Rragc	1.91981	3.12007	205.893	1.08122e-46	7.42283e-46
Arap1	1.91917	6.06778	217.87	2.63625e-49	1.89818e-48
Tpst2	1.91729	5.68619	163.54	1.90644e-37	1.09095e-36
Pi4k2a	1.91505	7.6356	258.704	3.28816e-58	2.76545e-57
Dhrs1	1.91021	4.9055	178.632	9.64156e-41	5.88085e-40
Galns	1.90798	4.55783	242.131	1.34949e-54	1.06597e-53
Rab1	1.90425	8.0101	236.086	2.80713e-53	2.16662e-52
Lonrf1	1.90312	3.0749	209.724	1.57752e-47	1.09737e-46
Vav3	1.90102	5.51569	224.314	1.03641e-50	7.65708e-50
Ctns	1.90036	5.07448	198.506	4.42499e-45	2.95062e-44
Irf2bpl	1.89783	4.14107	175.82	3.96482e-40	2.39768e-39
Mettl21a	1.89207	4.76513	212.361	4.1963e-48	2.94364e-47
Slc46a1	1.87521	3.61435	83.7457	5.62702e-20	1.9673e-19
Ripk1	1.87328	4.32728	179.048	7.82259e-41	4.78374e-40
Fuom	1.87143	3.20216	217.172	3.74286e-49	2.6827e-48
Creb3	1.86814	5.19528	244.073	5.08846e-55	4.05331e-54
6330416G13Rik	1.86762	5.27578	214.725	1.27933e-48	9.06864e-48
P4ha1	1.8665	4.44126	103.824	2.21087e-24	8.93115e-24
Nfe2l2	1.86621	7.07665	200.258	1.83469e-45	1.23209e-44
Calm1	1.86254	5.63813	259.719	1.97598e-58	1.66781e-57
Ier5l	1.86071	5.36763	242.813	9.57834e-55	7.58714e-54
Wsb2	1.86022	4.77998	94.3758	2.60961e-22	9.85333e-22
Hexb	1.85895	6.78459	245.049	3.1185e-55	2.49674e-54
Sirt2	1.85748	6.19361	198.406	4.65309e-45	3.0998e-44
Aldh6a1	1.85706	3.8974	219.162	1.37775e-49	9.93534e-49
Tmem159	1.84894	4.14746	181.842	1.91936e-41	1.1928e-40
Dolk	1.84819	4.87316	241.673	1.69766e-54	1.33875e-53
Lcp1	1.84329	5.3088	231.897	2.29974e-52	1.75302e-51
Pgam1	1.84272	9.48669	262.489	4.91997e-59	4.21037e-58
Plekhm3	1.84073	3.2752	204.137	2.61273e-46	1.78419e-45
Ptpra	1.84069	7.96531	230.004	5.94833e-52	4.49793e-51
Snx3	1.83941	9.80582	208.831	2.47099e-47	1.713e-46
Kctd17	1.83841	3.46241	192.789	7.82762e-44	5.10417e-43
Pgpep1	1.8383	3.94979	208.428	3.02581e-47	2.09558e-46
Cst3	1.83288	10.3674	253.407	4.69488e-57	3.87041e-56
Adcy7	1.83282	6.33563	245.542	2.43454e-55	1.95246e-54
Ap5b1	1.83091	5.32595	213.564	2.29216e-48	1.61834e-47
Ebpl	1.82596	6.38678	197.227	8.4137e-45	5.57359e-44
Gm4120	1.82474	4.86158	204.199	2.53194e-46	1.72986e-45
Rab4a	1.82345	3.36237	199.683	2.44916e-45	1.64084e-44
Ccdc25	1.8163	10.6899	125.355	4.25563e-29	1.95373e-28
Aim1	1.81331	6.0657	224.726	8.42684e-51	6.2356e-50
Slc2a1	1.80527	6.98224	222.73	2.29554e-50	1.68106e-49
Paox	1.79934	6.45543	175.556	4.52624e-40	2.73603e-39
Large	1.79855	4.8759	73.2919	1.11824e-17	3.62085e-17
Skap2	1.79522	7.48131	238.813	7.13853e-54	5.57041e-53
Cbr1	1.79318	5.42479	183.218	9.61186e-42	6.03158e-41
Alg14	1.78444	4.05287	216.556	5.10027e-49	3.64456e-48
Gdpd1	1.78302	4.62785	222.975	2.02988e-50	1.48805e-49
Arl8b	1.78182	6.94453	222.154	3.0658e-50	2.23935e-49
Pla2g4a	1.77707	4.85841	186.387	1.95418e-42	1.24503e-41
Tep1	1.7735	5.71131	219.642	1.08261e-49	7.82294e-49
Kif1c	1.7723	5.06881	226.901	2.82639e-51	2.11241e-50
Pstpip2	1.76994	3.02858	141.247	1.42111e-32	7.22961e-32
Rtn4	1.76835	7.2336	226.473	3.50396e-51	2.61192e-50
Slc25a45	1.76816	5.60311	231.14	3.36317e-52	2.55403e-51
Abcc4	1.76015	3.19612	177.749	1.50269e-40	9.13806e-40
Dcun1d3	1.75954	4.26557	137.495	9.40017e-32	4.69114e-31
Xkr8	1.75681	3.48159	169.998	7.40473e-39	4.35339e-38
Sat1	1.7562	4.42265	136.952	1.23514e-31	6.12937e-31
Arl6ip5	1.75536	6.69284	170.301	6.36002e-39	3.7454e-38
Gm13157	1.75454	4.50428	205.967	1.04159e-46	7.15771e-46
Ndst2	1.75431	4.51786	170.894	4.7187e-39	2.78695e-38
Mthfr	1.75239	5.55376	212.604	3.71394e-48	2.61304e-47
B230118H07Rik	1.75234	4.60954	192.898	7.40763e-44	4.83253e-43
Fam213a	1.75147	5.49121	175.344	5.03547e-40	3.04125e-39
Zdhhc12	1.75074	3.81938	205.922	1.06576e-46	7.32025e-46
Atp6v0d1	1.74681	7.30494	201.96	7.79992e-46	5.28566e-45
Dennd1a	1.74555	5.97324	215.751	7.64393e-49	5.44846e-48
Sgcb	1.74439	4.40192	153.424	3.09492e-35	1.68202e-34
Tex2	1.74307	4.9913	165.717	6.37889e-38	3.68752e-37
Rap1b	1.74307	8.32211	213.772	2.06509e-48	1.45947e-47
Rab14	1.73999	7.73372	188.946	5.40077e-43	3.46427e-42
5031439G07Rik	1.73933	6.60575	217.394	3.34887e-49	2.40152e-48
Msrb2	1.73837	4.84224	218.05	2.40895e-49	1.7354e-48
Scarb2	1.73668	6.35979	204.816	1.85799e-46	1.27124e-45
Ap5z1	1.7357	5.06979	177.081	2.10245e-40	1.27525e-39
Slc12a7	1.73443	4.13438	157.051	4.98848e-36	2.75446e-35
Ms4a4c	1.73349	11.1271	120.839	4.14479e-28	1.85592e-27
Vegfb	1.73027	4.7806	178.79	8.90298e-41	5.43888e-40
Atp1a1	1.72891	8.13002	145.094	2.04878e-33	1.06289e-32
Atg4c	1.7219	3.32866	123.317	1.18869e-28	5.39597e-28
Snap47	1.7183	4.53891	150.601	1.28091e-34	6.85363e-34
Plscr1	1.71819	4.11056	192.192	1.05636e-43	6.87242e-43
Dirc2	1.71294	4.71955	180.694	3.41822e-41	2.10946e-40
Vax2	1.71206	6.53207	120.805	4.21675e-28	1.88635e-27
Ddx58	1.70632	5.02799	90.3303	2.01541e-21	7.38341e-21
Gm2a	1.70434	5.1027	192.784	7.84541e-44	5.11342e-43
Spry2	1.70227	4.18188	169.299	1.05261e-38	6.16805e-38
Mink1	1.6995	5.02079	131.57	1.85783e-30	8.8356e-30
Sertad1	1.69898	4.74751	177.651	1.57903e-40	9.5982e-40
Slc39a3	1.6986	3.88471	178.968	8.14274e-41	4.97737e-40
Cask	1.69847	3.56525	163.651	1.80348e-37	1.03245e-36
Cers2	1.69795	6.00722	124.85	5.48974e-29	2.51297e-28
BC005537	1.69382	4.52362	190.119	2.99533e-43	1.93182e-42
Laptm4a	1.69133	6.72231	192.455	9.25538e-44	6.02962e-43
Pald1	1.68731	3.32871	48.0091	4.24238e-12	1.09544e-11
Vps18	1.68475	5.91382	171.366	3.72247e-39	2.20407e-38
Armc3	1.67997	3.62211	143.614	4.31401e-33	2.22422e-32
Wrb	1.67902	3.3518	168.526	1.55301e-38	9.06275e-38
Irf9	1.67508	4.5229	160.902	7.18747e-37	4.05078e-36
Atg7	1.67216	4.73753	126.01	3.06014e-29	1.40946e-28
Prdx1	1.67209	6.24832	198.66	4.09596e-45	2.73251e-44
5330426P16Rik	1.67005	3.5997	96.3743	9.50933e-23	3.63707e-22
Wdr7	1.66838	5.91251	183.434	8.62169e-42	5.41744e-41
Eif1a	1.6667	6.18091	197.398	7.72039e-45	5.12149e-44
Ptpn1	1.66324	5.13112	193.969	4.3258e-44	2.82724e-43
Blcap	1.65968	6.00419	200.077	2.00905e-45	1.34854e-44
Slc39a1	1.65789	8.09694	210.38	1.13514e-47	7.92363e-47
Tmem126b	1.6562	3.44172	169.882	7.84971e-39	4.61309e-38
Cep170	1.65533	3.92277	81.0066	2.24967e-19	7.70732e-19
As3mt	1.64975	3.58918	139.157	4.06886e-32	2.04715e-31
Rhob	1.64663	5.1696	192.382	9.60303e-44	6.25036e-43
Pcyox1	1.6462	5.66283	56.7188	5.02805e-14	1.41688e-13
Ago4	1.64026	3.79395	149.556	2.16822e-34	1.15359e-33
Gltp	1.63351	4.11689	165.182	8.34781e-38	4.80415e-37
Mxd1	1.63303	4.003	165.12	8.61311e-38	4.95481e-37
Stx7	1.63004	6.69051	142.586	7.24199e-33	3.71087e-32
Nfic	1.62681	4.80536	26.8488	2.2001e-07	4.47508e-07
Phlda3	1.62642	5.31237	160.008	1.12674e-36	6.33507e-36
Gm5595	1.62609	5.20902	128.753	7.67896e-30	3.59172e-29
Rragd	1.62421	4.34223	167.635	2.43109e-38	1.41635e-37
Dnajc4	1.61914	5.18541	194.593	3.161e-44	2.06882e-43
Ppard	1.61882	3.81597	152.545	4.81536e-35	2.60404e-34
Klc4	1.61754	5.37484	137.833	7.92631e-32	3.9668e-31
Arl10	1.61746	4.05791	168.363	1.68529e-38	9.82251e-38
Lpar6	1.61627	7.44756	149.167	2.63657e-34	1.39909e-33
Ncf4	1.61275	9.2919	201.836	8.30401e-46	5.61383e-45
Sptlc2	1.61235	5.22984	189.892	3.35746e-43	2.16243e-42
Mvd	1.61126	4.21943	171.566	3.36647e-39	1.99495e-38
Gm5296	1.6092	3.33975	132.509	1.15757e-30	5.54999e-30
Gnaq	1.60667	4.44527	171.071	4.3182e-39	2.55466e-38
Vps26a	1.60584	6.98959	200.821	1.38234e-45	9.31399e-45
Gm12942	1.60552	4.50212	191.631	1.40089e-43	9.08461e-43
Cdkn1a	1.60194	6.95917	143.252	5.17852e-33	2.66606e-32
Myadm	1.5961	5.29554	153.001	3.82966e-35	2.07734e-34
Vti1b	1.59603	8.37616	137.819	7.98494e-32	3.99332e-31
Sypl	1.58885	7.07679	149.389	2.35812e-34	1.25415e-33
Akr1a1	1.58788	10.8194	194.115	4.0202e-44	2.62993e-43
Clip1	1.58769	4.23969	169.267	1.06988e-38	6.26665e-38
Rassf4	1.58683	4.67074	157.618	3.75026e-36	2.07886e-35
Vipas39	1.58566	6.16582	141.32	1.36955e-32	6.9727e-32
Pcyt1a	1.58145	6.39614	184.21	5.83706e-42	3.6857e-41
Lrrc8a	1.58016	6.06728	165.441	7.32963e-38	4.22677e-37
Sptssa	1.57898	7.18398	147.569	5.89281e-34	3.09684e-33
Notum	1.57793	6.22781	59.1897	1.43183e-14	4.12091e-14
Abr	1.57526	3.27923	116.747	3.26068e-27	1.41877e-26
Sumf2	1.57432	3.04817	129.366	5.63858e-30	2.6461e-29
Nus1	1.57308	6.41406	189.005	5.24104e-43	3.36486e-42
Extl2	1.57236	4.61645	176.049	3.53351e-40	2.13959e-39
Cept1	1.57069	7.15398	135.484	2.58802e-31	1.26831e-30
Tmem196	1.56924	3.57229	22.3191	2.30902e-06	4.40916e-06
B4gat1	1.56894	4.79558	169.454	9.73787e-39	5.70851e-38
Slc35c2	1.56449	4.43603	147.648	5.66375e-34	2.97867e-33
St6galnac6	1.55939	6.33126	157.793	3.43538e-36	1.90656e-35
Dusp6	1.55815	7.63243	157.308	4.38319e-36	2.42592e-35
Akap10	1.55769	3.96775	141.585	1.19841e-32	6.11644e-32
Nt5dc2	1.55662	4.00555	136.378	1.64927e-31	8.1417e-31
Mfsd5	1.55528	8.20575	160.701	7.95102e-37	4.47577e-36
Nme4	1.54933	3.42656	146.948	8.05653e-34	4.22453e-33
Tmem184b	1.54913	5.82722	169.142	1.13924e-38	6.67011e-38
Def8	1.54911	5.63224	176.132	3.38833e-40	2.05344e-39
Steap3	1.5489	3.08816	113.348	1.81048e-26	7.73978e-26
Creld1	1.54821	3.51573	132.525	1.14828e-30	5.50732e-30
Dhrs7	1.54586	7.58446	134.446	4.36322e-31	2.12285e-30
Ttl	1.54459	3.39076	138.819	4.82553e-32	2.4244e-31
Arhgap9	1.53885	7.39821	158.55	2.34686e-36	1.31015e-35
Fam102b	1.53828	5.74263	146.425	1.04823e-33	5.48029e-33
Unc119	1.53735	6.20848	180.773	3.28607e-41	2.02968e-40
Igf2r	1.53683	5.45244	177.35	1.83665e-40	1.11546e-39
Wdfy1	1.53657	5.58793	146.86	8.42036e-34	4.41205e-33
Tbc1d22a	1.53542	7.43437	155.85	9.13016e-36	5.01398e-35
Derl2	1.53275	7.7282	152.74	4.36715e-35	2.36347e-34
Acaa1a	1.5327	3.82821	133.246	7.9868e-31	3.84883e-30
Samd9l	1.53225	5.99568	162.903	2.62619e-37	1.49737e-36
Ptpn9	1.53165	4.99125	145.311	1.83681e-33	9.53969e-33
Skint7	1.52772	11.1781	112.261	3.13233e-26	1.33063e-25
Apbb2	1.52722	3.49737	69.7877	6.60428e-17	2.08044e-16
Arhgap23	1.52649	4.90208	165.525	7.02511e-38	4.05282e-37
Aldh4a1	1.52646	4.61546	162.4	3.38323e-37	1.92514e-36
Pkd1l2	1.52478	3.99861	68.1988	1.47819e-16	4.5972e-16
Tmem237	1.52237	3.8402	121.056	3.71421e-28	1.6668e-27
Klf10	1.51949	5.83696	168.932	1.26569e-38	7.40436e-38
Maged2	1.51641	3.69394	130.613	3.00838e-30	1.42073e-29
Gclm	1.51574	5.16286	160.857	7.35203e-37	4.14188e-36
Hdhd3	1.51553	3.54917	130.741	2.82119e-30	1.33322e-29
Acad8	1.51544	4.32746	154.449	1.84784e-35	1.0089e-34
Pon3	1.51497	7.14812	163.017	2.4799e-37	1.4151e-36
Pank3	1.51022	6.54132	165.108	8.6639e-38	4.982e-37
Ap3s1	1.50637	7.63303	155.602	1.03452e-35	5.67684e-35
Chmp3	1.50595	3.88109	162.538	3.15572e-37	1.79713e-36
Hcfc1r1	1.50443	6.42504	118.117	1.63416e-27	7.17438e-27
Mcoln2	1.504	6.37601	153.406	3.12334e-35	1.69681e-34
Stx2	1.50177	5.48128	170.272	6.45365e-39	3.79738e-38
Stx11	1.49847	3.73415	132.094	1.42721e-30	6.82432e-30
Rbms1	1.49623	3.94744	137.106	1.14294e-31	5.68582e-31
Rps6ka3	1.49412	3.06452	125.541	3.87581e-29	1.78282e-28
Igsf8	1.49241	7.28743	147.538	5.98674e-34	3.14387e-33
Plk2	1.4807	3.01815	33.2028	8.3031e-09	1.82831e-08
Gsto1	1.47968	5.23545	43.5841	4.06128e-11	1.00261e-10
Mapk3	1.47967	6.81341	90.5287	1.82315e-21	6.69293e-21
Phf13	1.47571	4.521	146.831	8.54343e-34	4.47265e-33
Reep3	1.47012	7.04186	150.453	1.38012e-34	7.38168e-34
Bmp2k	1.45958	3.68238	120.944	3.93049e-28	1.76275e-27
Gm35410	1.45508	10.8147	86.8498	1.17085e-20	4.19393e-20
D15Ertd621e	1.45102	6.04711	165.305	7.84756e-38	4.52177e-37
Fam174a	1.44877	6.5183	145.504	1.66607e-33	8.66248e-33
Agap3	1.44555	7.63087	154.748	1.58922e-35	8.69039e-35
Tigar	1.44495	4.00109	143.644	4.24932e-33	2.19166e-32
Myo9a	1.44346	3.33197	120.304	5.42847e-28	2.42611e-27
Orai1	1.42969	4.19128	137.068	1.16515e-31	5.79221e-31
Map3k2	1.4251	3.48926	117.912	1.81294e-27	7.94698e-27
Manba	1.42487	5.06353	95.7911	1.27669e-22	4.86459e-22
Fbxo6	1.42201	3.02556	117.986	1.74591e-27	7.65553e-27
Pgap2	1.42073	3.82156	137.998	7.29335e-32	3.65261e-31
Ccdc138	1.41411	10.9201	79.5204	4.77268e-19	1.61634e-18
Serpinb9	1.41119	3.08164	93.3163	4.45717e-22	1.66958e-21
Fbxo4	1.40283	4.37997	144.161	3.27571e-33	1.69444e-32
Lgals8	1.40211	4.30867	125.487	3.98284e-29	1.83087e-28
Abcd4	1.40041	4.76784	112.748	2.45065e-26	1.04355e-25
Slamf9	1.40007	3.2649	74.8839	4.99215e-18	1.6378e-17
Slc12a4	1.3847	5.2455	141.453	1.2811e-32	6.53377e-32
Tor1aip2	1.38221	5.16786	135.471	2.60476e-31	1.27607e-30
Smurf1	1.38163	4.56412	136.417	1.61725e-31	7.992e-31
Dnajb9	1.37967	4.32932	128.686	7.94307e-30	3.71279e-29
Sp100	1.37881	5.12672	128.335	9.48121e-30	4.42884e-29
Cdc42ep2	1.36889	5.06892	124.964	5.18155e-29	2.37496e-28
Myl12b	1.36446	3.17884	95.1498	1.76507e-22	6.69131e-22
Erlin2	1.36173	4.20313	120.084	6.06454e-28	2.70271e-27
Gm10426	1.35904	4.2991	64.9103	7.83852e-16	2.37673e-15
Txndc15	1.35607	7.14051	123.877	8.96139e-29	4.08235e-28
Dock7	1.34244	4.20455	129.159	6.25895e-30	2.93331e-29
Samhd1	1.34046	5.16948	131.032	2.43681e-30	1.15272e-29
Ehd1	1.33823	8.0334	102.625	4.0496e-24	1.62064e-23
Snx20	1.3379	7.94646	133.827	5.96168e-31	2.88668e-30
Parp14	1.33569	6.86157	133.633	6.57214e-31	3.17792e-30
Ubtf	1.33479	11.1516	83.4976	6.37936e-20	2.2243e-19
Rab7	1.33359	6.95787	101.305	7.88558e-24	3.13102e-23
Zbtb4	1.33124	4.07369	106.693	5.19787e-25	2.13632e-24
Nagpa	1.32188	4.76156	92.9416	5.38596e-22	2.0127e-21
Ifngr2	1.31763	6.20818	106.395	6.04179e-25	2.47598e-24
Cib2	1.30476	4.48785	119.421	8.47158e-28	3.75651e-27
Tspan31	1.29511	6.46927	118.552	1.31243e-27	5.78162e-27
Metap1	1.28574	7.48974	85.7213	2.07172e-20	7.3723e-20
Klf7	1.27581	3.07874	89.1803	3.60427e-21	1.31227e-20
Hist1h2bc	1.27581	7.54802	97.7666	4.7072e-23	1.82303e-22
Tspo	1.27261	7.72612	119.853	6.81108e-28	3.03159e-27
Tspan3	1.26066	7.4791	98.4154	3.3921e-23	1.31984e-22
Pfkl	1.25611	4.27228	85.0907	2.84983e-20	1.00779e-19
Ccrl2	1.24486	5.7534	115.932	4.91869e-27	2.13103e-26
Npc2	1.242	9.54779	116.788	3.19399e-27	1.39103e-26
Gpr107	1.23787	4.28268	96.3979	9.39657e-23	3.59588e-22
Lpp	1.23458	4.5556	81.5026	1.7503e-19	6.01539e-19
Spag9	1.23129	5.4787	109.937	1.01146e-25	4.23326e-25
Angptl6	1.21362	3.07384	89.9951	2.38755e-21	8.72868e-21
Irgm1	1.21113	5.74135	103.77	2.27173e-24	9.16915e-24
Creb5	1.20286	10.9501	59.8399	1.02898e-14	2.97417e-14
LOC102635467	1.19857	7.40838	71.1251	3.35272e-17	1.06803e-16
Rinl	1.18203	4.50984	95.4516	1.51552e-22	5.75913e-22
Prr13	1.17759	6.78644	95.248	1.67965e-22	6.37429e-22
C1galt1c1	1.1726	5.48	104.418	1.63834e-24	6.63534e-24
Cflar	1.17067	5.59565	78.3071	8.82045e-19	2.96169e-18
Stard3	1.16495	7.13783	94.4451	2.51991e-22	9.51719e-22
Abcg1	1.16292	6.84779	105.575	9.13876e-25	3.73004e-24
Pgm2	1.13547	7.18417	93.5449	3.97085e-22	1.49176e-21
Tmem219	1.1327	7.03874	90.8822	1.52488e-21	5.61397e-21
Eva1b	1.13147	6.31618	83.2404	7.2656e-20	2.52832e-19
Ccdc126	1.13082	4.21764	69.8387	6.43567e-17	2.03094e-16
Krtap10-10	1.12974	4.58007	10.1318	0.00145735	0.0022343
Pgs1	1.12486	5.27462	83.6215	5.99169e-20	2.09067e-19
Emc7	1.12311	7.21804	101.16	8.48335e-24	3.36365e-23
Eps8	1.1132	6.3143	93.9978	3.15872e-22	1.18918e-21
Mocs2	1.11239	6.37841	98.745	2.87201e-23	1.11994e-22
Yipf4	1.10965	6.44683	64.5891	9.22647e-16	2.791e-15
Tgoln1	1.10883	6.9321	83.0455	8.01869e-20	2.78355e-19
Foxl2	1.10721	8.30445	32.6666	1.09403e-08	2.38859e-08
Trafd1	1.1025	7.24382	79.9102	3.91817e-19	1.32917e-18
St3gal1	1.09695	3.9116	79.114	5.86265e-19	1.97838e-18
Leprot	1.09524	3.9927	48.4387	3.40784e-12	8.83395e-12
Fbxo28	1.09203	3.82034	79.1362	5.79735e-19	1.95681e-18
Parp11	1.0837	3.13423	53.7546	2.27165e-13	6.20509e-13
Gadd45b	1.0732	5.30729	70.9187	3.72261e-17	1.18346e-16
Ids	1.06852	6.08251	73.0044	1.29361e-17	4.182e-17
Pycard	1.06649	7.87776	73.2453	1.14497e-17	3.70655e-17
Cav2	1.04644	4.1232	66.8415	2.94243e-16	9.03984e-16
Abcc5	1.03662	4.0144	64.3984	1.01641e-15	3.06808e-15
Fkbp7	1.02358	3.38481	63.0101	2.05645e-15	6.13427e-15
Bsg	1.0179	5.56444	63.784	1.38836e-15	4.17214e-15
Gab2	1.00886	3.90497	62.7207	2.38196e-15	7.08584e-15
Tmed10	1.00394	8.71128	52.094	5.2907e-13	1.42423e-12
Picalm	1.00326	8.23301	73.3493	1.08619e-17	3.52273e-17
Snx6	0.993859	3.99034	62.0354	3.37336e-15	9.99517e-15
Scd4	0.993832	6.33596	54.2836	1.7354e-13	4.76816e-13
Sh2b2	0.985427	3.23045	27.3995	1.65474e-07	3.39163e-07
Vopp1	0.956545	6.91	63.4513	1.64384e-15	4.93256e-15
Rbp3	0.952118	6.94284	21.9308	2.82663e-06	5.36931e-06
Scarletltr	0.951765	5.50725	21.788	3.04502e-06	5.77254e-06
Stxbp3	0.938268	5.14218	57.8782	2.78861e-14	7.93075e-14
Chmp4b	0.930085	7.46772	56.9181	4.5435e-14	1.28263e-13
Il21r	0.929061	4.06381	57.1074	4.12647e-14	1.1663e-13
Ly6g5b	0.916147	3.49465	50.103	1.45886e-12	3.84765e-12
Ccdc86	0.915669	5.88185	54.3271	1.69747e-13	4.66638e-13
Notch3	0.912376	3.48534	8.16371	0.00427367	0.00626001
Tst	0.8882	3.40157	36.2616	1.72527e-09	3.94304e-09
Mdga2	0.858298	4.1236	41.5147	1.16988e-10	2.82893e-10
Zfp707	0.83116	4.29573	41.1235	1.42907e-10	3.44041e-10
Sertad2	0.82889	5.21035	12.3439	0.000442421	0.000711884
Map9	0.818341	4.51908	5.6407	0.0175482	0.0241391
Pisd	0.790751	3.35913	36.8068	1.30433e-09	2.99356e-09
Baiap2l2	0.766865	5.20945	7.37713	0.00660586	0.00950222
Igtp	0.669237	6.34826	30.3065	3.68894e-08	7.826e-08
Shisa5	0.657073	4.77036	30.9158	2.69475e-08	5.75653e-08
Tiparp	0.648556	5.00974	31.3113	2.19798e-08	4.72312e-08
Car7	0.627142	5.19925	19.653	9.28573e-06	1.70311e-05
LOC547349	0.612544	8.94287	28.8672	7.7515e-08	1.61543e-07
Gm11127	0.485642	10.0546	15.6642	7.56407e-05	0.000129572
C920025E04Rik	0.43317	8.03715	14.6206	0.000131472	0.000220935
Papd7	0.432744	4.05704	11.8929	0.000563476	0.000898908
H2-Bl	0.410565	7.68096	13.5907	0.000227306	0.00037456
Ankrd37	0.401446	4.41386	12.1028	0.000503457	0.000806523
H2-D1	0.370864	10.7166	9.9815	0.0015812	0.00241686
H2-Q2	0.365315	10.6407	10.6659	0.0010913	0.00169456
Tapbp	0.349372	3.44973	7.72814	0.00543669	0.00789337
H2-Q8	0.346199	9.66248	9.51961	0.00203288	0.00307406
Bnip3	0.276743	7.59183	5.53852	0.0186023	0.0255146
Dip2c	0.245994	3.1776	3.96485	0.0464595	0.0605453
Itpr3	-0.341236	6.10925	8.40937	0.00373293	0.00550724
Cd81	-0.382305	7.86629	11.8821	0.000566752	0.000903728
Acaca	-0.393361	5.48475	10.7745	0.00102906	0.00160389
Ndufa4	-0.529381	8.23085	16.6292	4.54456e-05	7.91109e-05
Egfl7	-0.556555	3.68386	17.8446	2.39695e-05	4.26696e-05
Btbd9	-0.602721	4.03943	24.2359	8.52276e-07	1.6751e-06
Srebf2	-0.671222	3.39921	27.9719	1.23087e-07	2.53717e-07
Cep68	-0.674301	3.71239	26.6441	2.44602e-07	4.96247e-07
Phpt1	-0.68211	6.22315	34.7771	3.69694e-09	8.2979e-09
Cbx6	-0.682915	4.81842	34.5512	4.15191e-09	9.28819e-09
Metrn	-0.687945	3.47272	23.5991	1.18643e-06	2.30912e-06
Mtfp1	-0.732816	3.39647	30.699	3.01314e-08	6.41153e-08
Gpatch4	-0.742183	5.1276	22.7796	1.81689e-06	3.49532e-06
Gins2	-0.774796	5.45328	44.5647	2.46086e-11	6.14477e-11
Pcna	-0.783988	9.0944	46.8067	7.83464e-12	2.00076e-11
BC030867	-0.789741	3.65016	37.6293	8.55479e-10	1.98041e-09
Snrnp25	-0.796125	7.52261	51.1788	8.43249e-13	2.24914e-12
Cdc7	-0.814878	3.6433	44.6627	2.3407e-11	5.8499e-11
Lsm4	-0.819276	7.82822	45.3497	1.64812e-11	4.14606e-11
Pck2	-0.837478	5.33331	49.4989	1.98481e-12	5.20475e-12
Sfxn1	-0.849755	6.43498	48.8301	2.7913e-12	7.26578e-12
Ndufs8	-0.865522	7.96089	55.2036	1.0867e-13	3.01193e-13
Ttc32	-0.881226	4.48042	42.4759	7.15568e-11	1.74795e-10
Mlh1	-0.893006	3.81583	53.0392	3.26952e-13	8.87602e-13
2810408I11Rik	-0.895229	3.3805	36.1409	1.83556e-09	4.18632e-09
Hist1h2af	-0.895901	11.0861	60.1311	8.87466e-15	2.57302e-14
Rbm4	-0.924949	5.31754	56.2881	6.25922e-14	1.75578e-13
Prpf19	-0.93082	3.64509	21.5016	3.53536e-06	6.6744e-06
Rnaseh2b	-0.938609	4.51759	63.3416	1.73793e-15	5.20937e-15
Wbscr27	-0.941286	3.19531	56.2399	6.41455e-14	1.79828e-13
Ccdc167	-0.942408	3.80817	60.6719	6.74244e-15	1.96853e-14
Lsm2	-0.945778	6.83602	66.0501	4.39603e-16	1.34212e-15
Idh3g	-0.947459	6.338	55.5283	9.21243e-14	2.55835e-13
Mrps28	-0.947534	6.40048	63.3994	1.68767e-15	5.06193e-15
Uchl4	-0.956885	4.68338	64.4177	1.00651e-15	3.03883e-15
Elp3	-0.957974	4.65298	62.8469	2.23419e-15	6.65604e-15
Idh3a	-0.960572	5.24652	64.6518	8.93724e-16	2.70582e-15
Hist1h2ak	-0.964397	11.0943	69.8034	6.55209e-17	2.06629e-16
Zw10	-0.9663	3.87667	49.5012	1.98247e-12	5.19957e-12
Nnt	-0.980439	6.82685	71.3169	3.04218e-17	9.70415e-17
Pgm2l1	-0.990412	3.8571	64.6276	9.0479e-16	2.73815e-15
1110001J03Rik	-0.994409	6.61248	64.5584	9.37136e-16	2.83362e-15
Cmc2	-0.996583	5.66132	73.7153	9.02389e-18	2.93333e-17
Abtb1	-0.998498	4.42678	61.0606	5.53444e-15	1.62253e-14
Msl3	-0.999517	5.88683	61.5401	4.33818e-15	1.27924e-14
Tmem254a	-1.00845	3.29136	52.2673	4.84374e-13	1.3062e-12
Kpnb1	-1.01176	4.37124	60.1599	8.74556e-15	2.53766e-14
0610009O20Rik	-1.01176	3.66375	56.7328	4.99249e-14	1.40742e-13
2310010J17Rik	-1.0118	4.73021	55.6255	8.76797e-14	2.44162e-13
Zfp664	-1.01382	4.31719	70.3444	4.98051e-17	1.5777e-16
Mis18a	-1.0184	4.63373	67.5315	2.07345e-16	6.41045e-16
Dcps	-1.02093	5.44734	80.3121	3.19702e-19	1.0895e-18
Hist1h2ah	-1.02411	11.3707	79.2925	5.35616e-19	1.80962e-18
Hist1h2aa	-1.02672	11.0819	83.7235	5.69057e-20	1.98854e-19
Gmnn	-1.02797	7.37513	61.1823	5.20282e-15	1.52784e-14
Tubg1	-1.0291	4.76813	58.5534	1.97844e-14	5.66303e-14
Mcrs1	-1.03211	5.95179	53.9805	2.02494e-13	5.54295e-13
Hist1h2ao	-1.03405	11.074	86.4138	1.45961e-20	5.21504e-20
Ppm1b	-1.03463	3.73536	62.0626	3.32719e-15	9.86042e-15
Fam133b	-1.03664	3.50916	57.5262	3.33499e-14	9.45616e-14
Atg101	-1.03871	6.57966	74.8391	5.10671e-18	1.67383e-17
Prmt5	-1.0411	4.54746	66.9448	2.79219e-16	8.58758e-16
Hist2h2ac	-1.04251	11.0651	85.0924	2.84745e-20	1.0072e-19
Hist1h2ag	-1.04806	11.1937	83.1674	7.539e-20	2.62217e-19
H2afj	-1.04859	11.0926	87.0471	1.05968e-20	3.80051e-20
Hist2h2aa2	-1.05828	10.9315	87.5213	8.33761e-21	3.00167e-20
Nop10	-1.06164	6.46887	70.7431	4.06896e-17	1.29212e-16
Rps4x	-1.06316	10.0397	91.0784	1.38088e-21	5.09176e-21
Fam13b	-1.06593	3.99359	63.2158	1.85259e-15	5.54366e-15
Hsp90aa1	-1.06779	8.01523	90.3203	2.02569e-21	7.41913e-21
Vps36	-1.06963	6.93966	59.0443	1.54166e-14	4.4325e-14
Mum1	-1.07626	3.69607	63.1804	1.88612e-15	5.64044e-15
Haus1	-1.08493	6.17463	75.3585	3.92563e-18	1.2945e-17
Zwilch	-1.08531	3.84846	64.5698	9.31743e-16	2.81791e-15
Eef2	-1.08921	10.3599	94.177	2.88531e-22	1.08798e-21
Lmnb2	-1.094	3.38631	72.3253	1.82492e-17	5.86483e-17
Msra	-1.09536	5.57622	88.1993	5.91815e-21	2.13987e-20
Yeats4	-1.09666	6.31502	95.6544	1.36794e-22	5.2081e-22
Ccar2	-1.11442	3.68067	72.6685	1.53362e-17	4.94664e-17
Haus4	-1.11528	6.66418	75.4399	3.76707e-18	1.24279e-17
Tram1	-1.11621	5.62774	87.8921	6.91251e-21	2.49431e-20
Rpa2	-1.11932	3.45502	3.04827	0.0808233	0.101598
Ran	-1.12112	9.79209	84.8472	3.2234e-20	1.13678e-19
LOC102641427	-1.13118	8.65981	103.35	2.80897e-24	1.12989e-23
Banf1	-1.13649	5.86785	59.9285	9.83643e-15	2.84545e-14
Atad2	-1.14246	4.70969	86.979	1.09681e-20	3.9317e-20
Pura	-1.15773	5.45155	84.6651	3.53434e-20	1.24427e-19
Rasl2-9	-1.1583	8.39161	86.0987	1.71179e-20	6.10836e-20
Ctc1	-1.15902	4.9235	66.6764	3.1995e-16	9.82322e-16
Lrrcc1	-1.15981	4.98054	89.7724	2.6719e-21	9.7506e-21
Cenpi	-1.16509	3.57015	74.8909	4.9747e-18	1.63245e-17
Thoc6	-1.16755	5.22046	92.1965	7.84823e-22	2.91821e-21
Gne	-1.16806	4.92947	88.7468	4.4873e-21	1.62958e-20
Imp3	-1.17175	8.12018	90.8521	1.54822e-21	5.69693e-21
Ftsj1	-1.17684	5.6499	110.024	9.68302e-26	4.05741e-25
Hist1h2an	-1.17924	10.8975	112.366	2.97094e-26	1.26283e-25
Gm5469	-1.17936	3.77763	80.5936	2.77256e-19	9.46441e-19
Fam72a	-1.1804	3.83807	91.6119	1.05458e-21	3.90077e-21
Cct5	-1.18462	8.84054	94.5023	2.44813e-22	9.25102e-22
Eefsec	-1.18557	3.87932	73.3467	1.08762e-17	3.52573e-17
LOC105247169	-1.18557	7.02234	91.8395	9.3997e-22	3.48594e-21
Prmt6	-1.18947	3.15833	61.2214	5.10038e-15	1.49869e-14
Aaas	-1.19489	3.94988	76.8415	1.85242e-18	6.16195e-18
Gtf3c5	-1.20038	5.38347	75.4534	3.74126e-18	1.23485e-17
Gm4737	-1.20154	6.17255	106.128	6.91173e-25	2.82677e-24
Srsf11	-1.20498	5.94449	99.4341	2.02802e-23	7.95207e-23
Wee1	-1.20608	3.11624	77.0966	1.62795e-18	5.43275e-18
Srbd1	-1.20879	4.27012	93.9928	3.16673e-22	1.19188e-21
Miip	-1.21353	5.49105	99.0254	2.49279e-23	9.74209e-23
Chaf1b	-1.21379	6.24116	76.8374	1.85633e-18	6.1731e-18
Bbs9	-1.2141	4.12594	96.6093	8.44522e-23	3.24233e-22
Sh2d3c	-1.22039	4.94767	99.4243	2.03805e-23	7.98916e-23
Nadk2	-1.22223	3.13172	94.1951	2.85901e-22	1.07864e-21
Ift57	-1.22516	3.94616	84.8589	3.20431e-20	1.13061e-19
Erh	-1.22518	8.52839	104.833	1.32908e-24	5.3998e-24
Rbbp7	-1.22644	7.74164	88.457	5.19528e-21	1.88138e-20
Dhx57	-1.23092	3.53775	92.6553	6.22444e-22	2.32052e-21
Zfp207	-1.23703	8.32153	113.926	1.35272e-26	5.80385e-26
Nap1l1	-1.238	7.20664	68.9351	1.01755e-16	3.1884e-16
Gm9933	-1.2381	3.69783	80.7827	2.51954e-19	8.61729e-19
Rpap3	-1.24078	5.84419	110.165	9.01594e-26	3.78013e-25
Fkbp3	-1.24665	6.65162	110.547	7.43577e-26	3.12408e-25
Zc3hc1	-1.24803	4.28931	95.5552	1.43827e-22	5.47292e-22
Zc3h12d	-1.24811	3.26653	71.3212	3.03553e-17	9.6851e-17
Snrpa1	-1.24973	7.44776	123.366	1.15983e-28	5.26833e-28
Cdkn2d	-1.25162	7.4508	117.822	1.89629e-27	8.30462e-27
Tial1	-1.25414	3.5684	108.046	2.62658e-25	1.08932e-24
Mical1	-1.25518	6.48956	123.381	1.15082e-28	5.23076e-28
Hp1bp3	-1.25932	3.23985	84.2461	4.36865e-20	1.53379e-19
Psph	-1.26021	4.98701	113.557	1.62901e-26	6.9745e-26
Zfp646	-1.26204	9.87819	122.692	1.62889e-28	7.37294e-28
Taf1d	-1.26264	3.3903	105.453	9.71876e-25	3.9622e-24
Hnrnpa3	-1.26977	9.81967	112.041	3.49912e-26	1.48377e-25
Pagr1a	-1.27132	5.01788	114.156	1.20478e-26	5.18014e-26
H2afz	-1.2729	10.0386	126.995	1.86233e-29	8.62531e-29
Mad1l1	-1.27369	3.98086	66.4938	3.50991e-16	1.07599e-15
Trip13	-1.27589	4.9971	118.615	1.27146e-27	5.60637e-27
Exosc5	-1.27683	7.16572	92.2484	7.64517e-22	2.84419e-21
Maf1	-1.27696	4.53091	87.1556	1.0031e-20	3.60123e-20
Elof1	-1.2779	8.3946	94.8423	2.06168e-22	7.80737e-22
Cbx5	-1.28514	3.16311	98.5242	3.21085e-23	1.25001e-22
Tubb4b	-1.29077	8.69569	106.222	6.5908e-25	2.69785e-24
Taf1	-1.29556	5.51946	89.4224	3.18899e-21	1.16227e-20
Ppp2r5c	-1.2992	5.35218	120.866	4.08775e-28	1.83153e-27
Med30	-1.30007	5.588	103.545	2.54538e-24	1.02619e-23
Ccdc97	-1.30072	5.56955	120.277	5.50252e-28	2.45614e-27
Ptgr1	-1.30084	7.47108	128.171	1.02956e-29	4.80452e-29
Pdcd2	-1.30205	5.43175	124.171	7.72931e-29	3.52561e-28
Ift140	-1.30497	4.55717	116.839	3.114e-27	1.35662e-26
Tyms-ps	-1.30501	4.53861	88.3285	5.54393e-21	2.0061e-20
Coro1a	-1.30654	9.16077	103.503	2.60002e-24	1.04763e-23
Ttc5	-1.31148	3.80245	65.5121	5.77592e-16	1.75659e-15
Timm17b	-1.31284	7.20623	126.103	2.91859e-29	1.34513e-28
Tra2b	-1.31322	8.08642	95.1797	1.73863e-22	6.59281e-22
Ttf2	-1.31424	5.44746	128.747	7.70448e-30	3.60246e-29
Scrib	-1.31548	6.67038	112.939	2.22532e-26	9.49028e-26
Hmgn1	-1.31595	5.0281	118.981	1.0572e-27	4.6689e-27
Smarcb1	-1.31737	6.61365	124.606	6.20699e-29	2.83854e-28
Setx	-1.31993	5.93756	87.6586	7.77869e-21	2.8033e-20
Msh5	-1.32381	3.4047	103.987	2.03641e-24	8.22873e-24
Tonsl	-1.32401	3.12238	114.469	1.02845e-26	4.42734e-26
Srsf6	-1.3243	5.97746	112.175	3.27114e-26	1.38876e-25
Dock6	-1.32463	3.79188	98.056	4.06724e-23	1.57863e-22
Ncapg2	-1.32756	4.55395	119.841	6.85484e-28	3.05011e-27
Fkbp4	-1.32899	6.79987	136.398	1.63271e-31	8.06278e-31
Polr2b	-1.32913	5.56043	135.865	2.1353e-31	1.04935e-30
Zfp362	-1.33036	5.91689	89.1266	3.70338e-21	1.34766e-20
Bub3	-1.3352	8.04635	118.369	1.4398e-27	6.33289e-27
Cenpo	-1.33642	4.54176	123.762	9.50024e-29	4.32643e-28
Snx25	-1.34019	5.3356	123.071	1.34534e-28	6.09731e-28
Ckap5	-1.3444	6.80112	136.131	1.86831e-31	9.19736e-31
Paip2b	-1.34454	4.20163	131.745	1.7014e-30	8.10798e-30
Tspyl3	-1.34504	4.86582	119.357	8.74754e-28	3.87282e-27
Cmss1	-1.3511	3.23094	100.942	9.47031e-24	3.74974e-23
Taf9	-1.35153	6.36892	106.709	5.15536e-25	2.11946e-24
Smc6	-1.35253	5.23396	103.493	2.61266e-24	1.05242e-23
Dus3l	-1.35608	4.41935	85.5607	2.24701e-20	7.98604e-20
Ankrd9	-1.35725	3.06988	111.143	5.50605e-26	2.32228e-25
Zbed3	-1.35977	3.97002	124.251	7.42509e-29	3.38903e-28
Git2	-1.36042	4.6199	84.1213	4.65335e-20	1.63213e-19
Srsf2	-1.36117	7.29917	129.521	5.21518e-30	2.44902e-29
3110009E18Rik	-1.36137	3.05491	103.573	2.50945e-24	1.012e-23
Cep89	-1.36203	5.02119	135.181	3.01474e-31	1.47488e-30
Prmt1	-1.36545	5.40743	52.793	3.70613e-13	1.00382e-12
Nup50	-1.36816	3.41608	103.478	2.63351e-24	1.06021e-23
Pus3	-1.36848	3.36688	100.408	1.24006e-23	4.88811e-23
Tyms	-1.36965	5.44342	132.067	1.4467e-30	6.91047e-30
Cnot3	-1.3701	4.59534	97.3277	5.87519e-23	2.26731e-22
Rtel1	-1.37095	4.03151	106.541	5.61183e-25	2.30378e-24
Snrpd1	-1.37133	8.11416	145.899	1.3656e-33	7.1159e-33
Emg1	-1.37145	7.27694	135.882	2.11724e-31	1.04083e-30
Blmh	-1.37455	4.14532	119.636	7.59851e-28	3.37148e-27
Nelfa	-1.37697	4.59635	119.742	7.20403e-28	3.19946e-27
Gmeb1	-1.37734	4.26126	113.815	1.43043e-26	6.12984e-26
Cct2	-1.37747	8.39944	145.857	1.39518e-33	7.26199e-33
Cops3	-1.37861	4.04046	121.405	3.11493e-28	1.40142e-27
Arl6	-1.37974	3.10977	106.471	5.81495e-25	2.38578e-24
Fancl	-1.38011	4.98528	100.373	1.26217e-23	4.97248e-23
Cdc25a	-1.3831	4.93236	131.381	2.04386e-30	9.70729e-30
Itgb3bp	-1.38472	5.17856	117.016	2.84789e-27	1.2426e-26
Stard7	-1.38928	6.53821	140.988	1.61861e-32	8.22549e-32
Irak1bp1	-1.39359	3.40382	113.276	1.87716e-26	8.01996e-26
Sf3a1	-1.39371	5.77539	136.352	1.67077e-31	8.24497e-31
Purb	-1.39388	5.76537	149.342	2.41385e-34	1.28283e-33
Nolc1	-1.39558	6.19187	108.185	2.44855e-25	1.01608e-24
Nde1	-1.39662	6.76831	119.784	7.05476e-28	3.13611e-27
Ucp2	-1.39748	7.35557	116.547	3.60655e-27	1.56782e-26
Alyref	-1.39836	7.20991	108.387	2.21144e-25	9.18491e-25
Anapc5	-1.39836	9.31847	131.666	1.77045e-30	8.43139e-30
Dot1l	-1.40203	5.20986	145.656	1.5434e-33	8.03057e-33
Hibadh	-1.40488	4.93945	113.92	1.35695e-26	5.82027e-26
Dis3	-1.40504	4.12878	127.679	1.31958e-29	6.13165e-29
Pbrm1	-1.40752	6.79021	106.571	5.52741e-25	2.26978e-24
Paics	-1.40885	6.38563	148.026	4.68136e-34	2.46935e-33
Set	-1.41097	5.61797	151.909	6.63144e-35	3.57522e-34
Hnrnpc	-1.41382	6.83338	116.53	3.63836e-27	1.58116e-26
Fen1	-1.41401	7.60971	112.016	3.54371e-26	1.50223e-25
Hnrnpm	-1.41904	5.4201	100.174	1.39615e-23	5.49116e-23
Pradc1	-1.41995	3.49207	122.056	2.24385e-28	1.01306e-27
Dctpp1	-1.42062	7.27856	143.439	4.71327e-33	2.4283e-32
Ecsit	-1.42418	6.09038	139.962	2.71346e-32	1.37302e-31
Lsm8	-1.42547	6.27138	56.5172	5.57076e-14	1.56638e-13
Npm3	-1.42595	3.58948	107.125	4.18001e-25	1.72198e-24
Nudcd1	-1.42604	3.57684	118.612	1.27381e-27	5.61498e-27
Brix1	-1.43086	5.7823	106.493	5.75083e-25	2.36016e-24
Nup37	-1.43194	4.13796	136.104	1.8935e-31	9.31817e-31
Ppp1cb	-1.43485	7.00807	137.823	7.96828e-32	3.98639e-31
Ppm1g	-1.43637	4.18427	121.94	2.3792e-28	1.07383e-27
Gm1976	-1.43755	3.11284	139.355	3.68372e-32	1.85602e-31
Map4k1	-1.43869	6.62856	149.684	2.03288e-34	1.08362e-33
Pars2	-1.44471	3.9846	148.152	4.3942e-34	2.32047e-33
Aldh18a1	-1.44929	3.8502	117.349	2.407e-27	1.05249e-26
Wrap53	-1.4498	5.30252	147.919	4.94249e-34	2.60418e-33
Frg1	-1.44989	6.08523	155.912	8.84811e-36	4.86474e-35
Uba2	-1.45034	4.59006	113.104	2.04707e-26	8.73797e-26
Usp10	-1.45212	4.8014	152.484	4.96602e-35	2.68347e-34
Haus5	-1.45218	4.06123	116.447	3.79333e-27	1.6475e-26
Tnrc6c	-1.45484	4.70127	160.946	7.03108e-37	3.9658e-36
Orc6	-1.45726	5.45555	134.72	3.80156e-31	1.85405e-30
Cdk2ap1	-1.46044	7.83041	165.993	5.55234e-38	3.21496e-37
R3hcc1	-1.46137	3.56925	127.84	1.21691e-29	5.65641e-29
Pabpn1	-1.46138	8.09423	119.253	9.22072e-28	4.07976e-27
Gm10257	-1.46701	10.5327	127.179	1.69752e-29	7.87231e-29
Exosc6	-1.46817	6.0094	149.628	2.09067e-34	1.114e-33
Celf1	-1.47094	4.58362	141.334	1.35982e-32	6.92773e-32
Pkib	-1.4713	5.33509	96.8719	7.39615e-23	2.84419e-22
Ddx46	-1.47207	5.21932	145.217	1.92538e-33	9.99604e-33
Nipsnap1	-1.4728	4.48988	131.944	1.53863e-30	7.3397e-30
Fpgs	-1.47331	3.84225	132.588	1.11236e-30	5.33686e-30
U2af1	-1.47467	3.64434	41.4276	1.22318e-10	2.95377e-10
Mrps35	-1.47473	4.23068	157.359	4.27294e-36	2.36675e-35
Rfwd3	-1.47671	6.45641	120.277	5.5026e-28	2.45614e-27
Nup85	-1.47714	7.02449	114.484	1.02107e-26	4.39689e-26
Pa2g4	-1.47745	5.36699	150.686	1.22771e-34	6.57394e-34
Bptf	-1.47919	3.83594	98.8728	2.69257e-23	1.05171e-22
Ift43	-1.47998	5.63893	162.851	2.69591e-37	1.53589e-36
Incenp	-1.48352	5.53043	32.7268	1.06066e-08	2.31822e-08
Sf3b1	-1.48367	4.41578	126.954	1.90095e-29	8.80131e-29
E130309D02Rik	-1.48421	6.08543	130.663	2.93372e-30	1.38593e-29
Nasp	-1.48542	4.6619	101.547	6.98018e-24	2.77776e-23
Ppil1	-1.48946	5.967	148.873	3.05695e-34	1.61913e-33
Mrpl49	-1.4904	5.37934	146.696	9.14492e-34	4.78285e-33
Stag1	-1.49126	5.08665	134.2	4.94013e-31	2.3986e-30
Cdc26	-1.50077	3.77578	140.627	1.94102e-32	9.84977e-32
Tardbp	-1.50132	8.42139	128.236	9.9675e-30	4.65446e-29
Pcmtd2	-1.50179	4.26471	126.858	1.99526e-29	9.23491e-29
Ipp	-1.50193	3.3096	132.265	1.30941e-30	6.26948e-30
Casp8ap2	-1.50229	3.31781	151.637	7.60595e-35	4.09438e-34
Vash1	-1.50437	7.38911	128.018	1.11217e-29	5.17976e-29
Marcksl1	-1.50579	5.493	127.008	1.85072e-29	8.57436e-29
Npm1	-1.50675	8.89305	171.872	2.88592e-39	1.71377e-38
Natd1	-1.50879	6.48331	168.767	1.37577e-38	8.04172e-38
Tmem107	-1.50936	3.72145	120.234	5.62084e-28	2.50813e-27
Cplx2	-1.51048	7.43717	121.097	3.63938e-28	1.63374e-27
Ccdc34	-1.51091	3.26091	118.79	1.16408e-27	5.13931e-27
Melk	-1.51117	4.15559	149.227	2.55794e-34	1.35838e-33
Kdm1a	-1.51152	6.08589	136.564	1.50193e-31	7.42991e-31
Nudt5	-1.51261	4.0393	146.175	1.18902e-33	6.20489e-33
Zbtb17	-1.51301	4.2243	152.226	5.65583e-35	3.0504e-34
Poc1a	-1.51403	5.33229	154.633	1.68459e-35	9.20482e-35
Dnmt1	-1.51537	4.18169	136.587	1.48435e-31	7.34807e-31
Baz1b	-1.51601	4.19207	109.423	1.31099e-25	5.4707e-25
Odf2	-1.5167	3.63024	117.47	2.26507e-27	9.91045e-27
Pdcd7	-1.51789	4.32743	154.297	1.99404e-35	1.08831e-34
Zfp335	-1.51946	3.17253	56.3674	6.01194e-14	1.68708e-13
Tnfrsf13b	-1.52073	6.77839	111.166	5.44299e-26	2.29637e-25
Bckdha	-1.52238	6.46639	142.867	6.28514e-33	3.22757e-32
Eng	-1.52282	4.16183	161.575	5.12253e-37	2.8997e-36
Cenpc1	-1.52339	3.46867	151.154	9.69852e-35	5.21291e-34
Trit1	-1.52402	4.36724	147.692	5.53851e-34	2.91389e-33
Rbm3	-1.52491	7.12853	129.193	6.15305e-30	2.88466e-29
Nsmaf	-1.52717	4.44741	158.161	2.85369e-36	1.58933e-35
Wdr83	-1.52787	3.79874	158.532	2.36788e-36	1.32137e-35
Brd3	-1.5313	3.27427	144.357	2.96789e-33	1.53577e-32
Hnrnpu	-1.53476	7.68214	161.386	5.63337e-37	3.18632e-36
Syvn1	-1.53558	8.45205	165.232	8.13957e-38	4.68621e-37
Ints1	-1.53635	4.60702	141.946	9.99294e-33	5.10754e-32
Dusp16	-1.53647	3.73706	161.915	4.31699e-37	2.44958e-36
Nup107	-1.53665	6.54619	137.012	1.19853e-31	5.95189e-31
Ddx27	-1.54003	5.00916	159.72	1.30266e-36	7.30679e-36
Rp9	-1.54064	7.8056	181.042	2.87069e-41	1.77622e-40
Spef1	-1.54143	4.23478	133.109	8.56001e-31	4.12225e-30
Akap2	-1.54212	4.1398	136.206	1.79892e-31	8.86812e-31
Tcea1	-1.54323	3.57575	129.704	4.75612e-30	2.23568e-29
Prr14	-1.54733	3.26465	110.8	6.54423e-26	2.75441e-25
Atrx	-1.54788	4.5435	114.711	9.10595e-27	3.92595e-26
Bend3	-1.54871	3.651	132.075	1.44105e-30	6.88583e-30
Siah1b	-1.55044	4.28168	42.0435	8.92644e-11	2.16927e-10
Zfp358	-1.55229	5.35365	172.784	1.82428e-39	1.08697e-38
Las1l	-1.55318	3.77136	153.331	3.24281e-35	1.76104e-34
Cd37	-1.55544	6.7578	135.509	2.55488e-31	1.2525e-30
Nono	-1.55556	8.47256	185.088	3.75445e-42	2.37916e-41
Ucp3	-1.55571	7.4528	150.241	1.536e-34	8.20611e-34
Unc119b	-1.55728	5.80673	163.16	2.30796e-37	1.31805e-36
Ddx54	-1.55807	7.24921	144.789	2.38875e-33	1.23836e-32
Smchd1	-1.56329	6.8266	169.59	9.09125e-39	5.33386e-38
Ruvbl1	-1.56963	6.53844	180.804	3.23495e-41	1.99898e-40
Pten	-1.57431	8.12156	174.097	9.42541e-40	5.64687e-39
Gmfg	-1.57521	8.82753	157.196	4.63743e-36	2.56362e-35
Rnu3b1	-1.57534	4.67118	134.363	4.55062e-31	2.21327e-30
Ifi30	-1.57536	7.55072	173.885	1.04886e-39	6.28119e-39
Matr3	-1.57611	3.42854	133.743	6.21917e-31	3.00827e-30
Pole2	-1.5778	3.11554	145.89	1.37216e-33	7.14745e-33
Usp42	-1.57892	3.35438	140.053	2.59185e-32	1.31289e-31
Thoc3	-1.57977	3.56538	157.202	4.62416e-36	2.55728e-35
Gba2	-1.58272	5.14213	166.136	5.16723e-38	2.99319e-37
Srsf7	-1.58697	6.96196	182.461	1.40671e-41	8.76518e-41
Aurka	-1.58715	6.65462	161.78	4.62204e-37	2.62058e-36
Eml4	-1.58727	4.52529	136.9	1.26789e-31	6.2897e-31
Spc25	-1.58819	7.35966	133.508	7.00081e-31	3.38174e-30
Tinf2	-1.58857	3.41308	168.695	1.42606e-38	8.32878e-38
Tdp2	-1.58901	3.90393	156.694	5.97206e-36	3.2937e-35
E130012A19Rik	-1.59076	4.12118	73.7577	8.8319e-18	2.87158e-17
Smim14	-1.5914	6.75197	168.735	1.3982e-38	8.16942e-38
Kmt2e	-1.59208	5.51936	174.621	7.24541e-40	4.35925e-39
Zfp292	-1.59247	4.19107	162.232	3.6813e-37	2.09223e-36
Luc7l2	-1.59311	4.28509	155.189	1.27309e-35	6.97518e-35
Cdk1	-1.59454	4.27286	157.804	3.41481e-36	1.89588e-35
Paip2	-1.5951	7.06514	175.965	3.68475e-40	2.23022e-39
Msl2	-1.59757	3.93307	172.294	2.33382e-39	1.38882e-38
Ofd1	-1.59867	3.89858	140.776	1.80087e-32	9.14512e-32
Gins1	-1.60061	4.76869	152.227	5.65301e-35	3.05004e-34
Thoc7	-1.6013	6.8157	159.462	1.48297e-36	8.30829e-36
Ephx1	-1.60165	6.87966	199.203	3.11699e-45	2.08432e-44
Pom121	-1.60334	3.44328	152.72	4.40944e-35	2.38545e-34
Pold2	-1.60354	5.3651	154.247	2.04483e-35	1.1156e-34
Ipmk	-1.6047	4.96072	182.811	1.17972e-41	7.38658e-41
Tdg	-1.60703	4.78322	162.478	3.25349e-37	1.85206e-36
Dtd1	-1.60958	3.25838	157.86	3.32114e-36	1.8446e-35
Znrd1	-1.61265	5.8056	185.436	3.15291e-42	2.00245e-41
Gemin6	-1.61494	5.17696	165.662	6.55785e-38	3.78788e-37
Arid1a	-1.61665	6.60195	118.443	1.38664e-27	6.10097e-27
Ddx39	-1.61717	7.22582	174.368	8.22468e-40	4.94004e-39
Mcm10	-1.61856	5.50265	190.076	3.05957e-43	1.97236e-42
Hnrnpd	-1.62445	5.0155	174.479	7.78071e-40	4.67734e-39
Nphp1	-1.62674	3.79667	181.5	2.28038e-41	1.41467e-40
Mad2l1	-1.62717	3.78351	182.699	1.24804e-41	7.80743e-41
Serinc3	-1.62758	10.009	200.262	1.83117e-45	1.23031e-44
Ube2s	-1.62885	7.74571	52.5357	4.22503e-13	1.1411e-12
Itpr2	-1.62886	6.95459	179.511	6.19609e-41	3.80057e-40
Nhp2l1	-1.63116	6.51994	195.366	2.14367e-44	1.40951e-43
Rnu2-10	-1.63208	3.0556	143.283	5.09845e-33	2.6258e-32
Snrpe	-1.63277	7.31137	194.773	2.88773e-44	1.89172e-43
Mylip	-1.63591	4.60651	170.752	5.07012e-39	2.99325e-38
Zfp777	-1.63625	3.71244	166.609	4.0717e-38	2.36439e-37
Ube2t	-1.64244	4.19647	177.942	1.36423e-40	8.30678e-40
Ncbp1	-1.64406	3.21295	53.0797	3.20278e-13	8.69983e-13
Lysmd1	-1.64517	5.39066	164.779	1.02217e-37	5.87542e-37
Gid4	-1.64557	3.04659	169.621	8.9504e-39	5.2534e-38
Kansl2	-1.64617	3.75972	172.234	2.40589e-39	1.43111e-38
Terf1	-1.64783	3.24054	118.312	1.4816e-27	6.51271e-27
Ddx39b	-1.64849	8.35443	159.541	1.42558e-36	7.99305e-36
Spin1	-1.65194	6.60047	153.893	2.44347e-35	1.33103e-34
Gm5124	-1.65336	4.31116	161.971	4.19859e-37	2.38335e-36
Txndc11	-1.65349	6.6813	200.353	1.74877e-45	1.17718e-44
Gm6579	-1.65451	7.92566	168.794	1.35727e-38	7.93683e-38
Ublcp1	-1.65458	5.17483	161.328	5.80144e-37	3.27876e-36
Cmtm7	-1.65591	8.36563	152.54	4.82927e-35	2.61057e-34
Gm36718	-1.6574	4.5688	85.3981	2.43951e-20	8.66152e-20
Clint1	-1.66009	6.45333	189.881	3.37468e-43	2.17252e-42
Pttg1	-1.66331	8.19089	188.844	5.68456e-43	3.64136e-42
1500012F01Rik	-1.6644	6.62507	204.417	2.26982e-46	1.55152e-45
Cenpl	-1.6673	3.64699	160.583	8.44004e-37	4.74727e-36
Ypel3	-1.66768	7.2774	148.16	4.37737e-34	2.31244e-33
Fus	-1.66876	4.70884	78.0101	1.02515e-18	3.43731e-18
Alyref2	-1.66922	3.99654	200.279	1.81524e-45	1.22018e-44
Itprip	-1.66958	5.91558	207.543	4.72072e-47	3.25668e-46
Nop56	-1.66981	6.42174	134.988	3.32133e-31	1.62151e-30
Immp2l	-1.67008	3.85447	144.913	2.24422e-33	1.16385e-32
Ssrp1	-1.67253	7.94934	201.123	1.18773e-45	8.0142e-45
Smad5	-1.67575	4.24331	149.799	1.91808e-34	1.02319e-33
Lamp3	-1.67664	6.12226	174.142	9.21639e-40	5.52632e-39
Rnaseh2a	-1.68783	4.8139	174.961	6.10538e-40	3.68273e-39
Fbxl14	-1.68864	6.1903	184.602	4.79486e-42	3.03168e-41
Zfp1	-1.69382	4.35136	181.172	2.68848e-41	1.66493e-40
Zfp131	-1.6952	5.43042	178.575	9.91973e-41	6.04792e-40
Rbm12	-1.69562	5.44701	185.649	2.83273e-42	1.79991e-41
Zfp553	-1.69599	3.53497	191.93	1.2051e-43	7.82208e-43
Mapk1ip1	-1.69688	4.42127	179.451	6.38715e-41	3.91607e-40
Zfp706	-1.6984	7.61529	224.835	7.97472e-51	5.9103e-50
Kti12	-1.69929	3.38224	165.898	5.82428e-38	3.37104e-37
Mta2	-1.7003	6.54124	159.383	1.54306e-36	8.64149e-36
Gm12271	-1.70087	9.17665	82.0901	1.30022e-19	4.48492e-19
Brd8	-1.70091	6.23526	205.651	1.22089e-46	8.36957e-46
Dhfr	-1.70223	4.07205	185.258	3.44793e-42	2.18688e-41
Taf5	-1.70457	3.05702	179.753	5.4873e-41	3.37165e-40
Sigirr	-1.70562	4.14199	182.473	1.39775e-41	8.71701e-41
Lrrc8c	-1.70715	3.07909	137.059	1.17033e-31	5.81389e-31
Ssbp1	-1.70941	3.90498	177.165	2.01608e-40	1.22338e-39
Bub1	-1.71294	4.43052	190.256	2.79546e-43	1.80539e-42
Slc38a2	-1.7135	5.63417	161.072	6.59862e-37	3.72633e-36
Cenpa	-1.71391	5.79865	222.025	3.2707e-50	2.38655e-49
Recql	-1.71409	3.01121	166.532	4.23365e-38	2.45743e-37
Cdc42ep3	-1.7153	4.87611	158.096	2.94913e-36	1.6412e-35
Gm10845	-1.71573	7.59288	210.528	1.05374e-47	7.36263e-47
Zfp61	-1.71601	3.85891	133.98	5.51789e-31	2.67453e-30
Arl2bp	-1.7163	7.1253	202.686	5.41758e-46	3.68006e-45
Exosc8	-1.7208	5.7411	228.671	1.16204e-51	8.74496e-51
Cdc6	-1.72278	3.69011	154.089	2.21412e-35	1.20703e-34
Zfp821	-1.72419	3.58822	186.46	1.88443e-42	1.20113e-41
Cenpw	-1.72459	6.12421	202.5	5.94632e-46	4.03535e-45
Ppid	-1.72478	6.825	193.626	5.13796e-44	3.3565e-43
Magoh	-1.72631	7.50309	189.364	4.37781e-43	2.81447e-42
Gm11974	-1.72702	6.17891	183.354	8.97566e-42	5.63735e-41
Rrm1	-1.72795	6.62594	226.974	2.72389e-51	2.03687e-50
H3f3a	-1.72894	10.467	198.976	3.49377e-45	2.33297e-44
Amer1	-1.72973	3.0186	186.109	2.24789e-42	1.43023e-41
Sumo2	-1.7299	4.8434	170.344	6.22439e-39	3.66706e-38
Chaf1a	-1.7328	4.37497	179.259	7.0332e-41	4.30658e-40
Wdtc1	-1.73439	3.08776	118.025	1.71256e-27	7.5116e-27
Rad21	-1.73634	7.45585	224.525	9.32209e-51	6.89445e-50
Kdm1b	-1.73722	4.58679	191.493	1.50106e-43	9.72978e-43
Eny2	-1.73723	5.67766	219.189	1.35928e-49	9.80721e-49
Nr2c2	-1.7378	3.38013	146.831	8.5455e-34	4.47265e-33
Gm5878	-1.73789	4.31788	149.977	1.75342e-34	9.36062e-34
Uck2	-1.73897	6.59858	213.702	2.13859e-48	1.51067e-47
Lsm3	-1.74099	5.22664	164.626	1.1041e-37	6.34379e-37
Snrpg	-1.74701	9.09384	45.7996	1.30987e-11	3.31814e-11
Smarca5-ps	-1.74854	4.62833	211.326	7.05565e-48	4.93965e-47
Eri1	-1.74931	4.0299	190.606	2.3446e-43	1.5149e-42
Kcnq1ot1	-1.74996	3.38766	188.818	5.75918e-43	3.68749e-42
F830016B08Rik	-1.75059	3.69723	53.5027	2.58238e-13	7.04163e-13
Hist1h4i	-1.75551	3.77557	154.88	1.48751e-35	8.14051e-35
Gle1	-1.75603	3.38035	161.606	5.04462e-37	2.85788e-36
Zfp629	-1.75729	5.11038	174.111	9.36063e-40	5.61044e-39
Dek	-1.75839	8.07417	183.877	6.9022e-42	4.35438e-41
Arl4a	-1.76555	4.11373	195.392	2.11567e-44	1.39175e-43
Hcfc1	-1.77232	5.91707	210.679	9.76854e-48	6.82882e-47
Ggnbp2	-1.78096	3.03933	153.227	3.41653e-35	1.85467e-34
Klhl12	-1.7822	4.27982	173.117	1.54347e-39	9.21983e-39
Rnf167	-1.78448	4.91626	227.308	2.30366e-51	1.72537e-50
Pqbp1	-1.78894	4.70746	213.022	3.00938e-48	2.1226e-47
Polr3b	-1.78899	3.60916	206.424	8.28139e-47	5.70473e-46
Kpna2	-1.78945	8.6573	188.493	6.78185e-43	4.33836e-42
Naa16	-1.79108	3.94477	204.864	1.81321e-46	1.2412e-45
Cep63	-1.79626	4.84186	224.933	7.59387e-51	5.63395e-50
Hnrnpa0	-1.79729	7.63865	217.453	3.25141e-49	2.33281e-48
Nfatc3	-1.79769	5.88867	182.363	1.47724e-41	9.20058e-41
H2afy	-1.79976	8.04169	114.013	1.29466e-26	5.56149e-26
Smc2	-1.80583	5.70737	191.971	1.18086e-43	7.67182e-43
Fam65a	-1.8088	7.4107	233.644	9.56434e-53	7.33404e-52
Fam204a	-1.81131	4.40364	210.983	8.38275e-48	5.86295e-47
Rnf113a2	-1.81252	4.61187	217.718	2.84607e-49	2.04613e-48
Sacs	-1.81511	3.27185	144.526	2.72615e-33	1.41223e-32
Chd3	-1.81535	6.05998	199.356	2.88671e-45	1.933e-44
Cad	-1.81741	4.2271	180.196	4.39126e-41	2.70406e-40
Isg20l2	-1.81991	4.42051	187.825	9.48427e-43	6.05889e-42
Pmf1	-1.82356	4.82411	172.801	1.80881e-39	1.07821e-38
Cdca4	-1.82375	4.14238	172.067	2.61597e-39	1.55476e-38
Fubp1	-1.82419	5.95725	157.969	3.14374e-36	1.74744e-35
Napsa	-1.82747	5.06834	206.726	7.11655e-47	4.90471e-46
Sdhaf2	-1.82778	4.48949	223.217	1.79774e-50	1.3213e-49
Trp53	-1.82785	4.34335	151.651	7.55339e-35	4.06763e-34
Zbtb2	-1.82808	3.5907	212.57	3.77668e-48	2.65587e-47
Cdca8	-1.82897	4.0807	139.883	2.8238e-32	1.42732e-31
Zfp62	-1.82961	4.28789	233.516	1.0198e-52	7.81151e-52
Nfkbia	-1.83004	8.47254	227.65	1.94e-51	1.45454e-50
Nucks1	-1.83055	5.28291	221.089	5.23329e-50	3.80098e-49
Srrt	-1.83065	3.28435	216.575	5.05274e-49	3.61424e-48
Gsg2	-1.83406	3.58455	156.247	7.47725e-36	4.11743e-35
Gm12657	-1.83519	9.78966	197.137	8.80474e-45	5.82445e-44
Csk	-1.83535	4.83658	179.332	6.78074e-41	4.15558e-40
Wbp1	-1.83568	6.94112	196.45	1.24296e-44	8.20317e-44
Senp1	-1.84421	4.99865	220.683	6.41882e-50	4.65488e-49
Fkbp5	-1.84481	4.64178	76.2322	2.52198e-18	8.34941e-18
Zcchc7	-1.84559	3.88685	235.312	4.13906e-53	3.18595e-52
Snrnp48	-1.84608	5.56112	198.25	5.03278e-45	3.35116e-44
Odc1	-1.8536	6.78391	244.416	4.28382e-55	3.42198e-54
Sfpq	-1.85845	5.4804	259.147	2.63244e-58	2.21529e-57
Trim59	-1.86006	5.56033	227.297	2.31673e-51	1.73424e-50
Zbed4	-1.86272	5.21188	235.977	2.96509e-53	2.28729e-52
0610011F06Rik	-1.86375	4.40714	236.107	2.77731e-53	2.14477e-52
A630001G21Rik	-1.86424	3.86905	131.839	1.62262e-30	7.73517e-30
Twsg1	-1.865	4.26873	223.21	1.80397e-50	1.32518e-49
Abcg2	-1.86584	4.49915	226.728	3.08219e-51	2.30116e-50
Rpgrip1	-1.87324	6.13186	212.429	4.05499e-48	2.84593e-47
Hnrnpdl	-1.87558	6.88104	219.525	1.14819e-49	8.29265e-49
Bcl2l12	-1.87675	3.15527	122.885	1.47775e-28	6.69314e-28
Srsf4	-1.87761	5.58578	217.794	2.73929e-49	1.97137e-48
Zfp212	-1.87861	4.88416	251.771	1.06754e-56	8.75479e-56
4930427A07Rik	-1.87946	3.4025	221.222	4.8958e-50	3.55951e-49
Snhg8	-1.87984	7.58324	198.692	4.02971e-45	2.68957e-44
LOC102642045	-1.88016	8.13239	201.129	1.1845e-45	7.9962e-45
Vbp1	-1.88022	5.34795	245.983	1.95109e-55	1.56652e-54
Mtbp	-1.88414	3.871	222.03	3.26232e-50	2.38166e-49
Mplkip	-1.88573	4.68639	220.523	6.95555e-50	5.03895e-49
Cse1l	-1.88573	4.15077	179.714	5.59705e-41	3.4376e-40
Snrpf	-1.88663	7.24013	166.529	4.23865e-38	2.45932e-37
Tcf4	-1.88671	5.86929	220.613	6.64653e-50	4.81754e-49
Vrk1	-1.88738	3.77008	236.791	1.96969e-53	1.52524e-52
Traf3ip2	-1.88906	4.08042	212.032	4.94941e-48	3.4685e-47
Atr	-1.88963	4.17281	233.427	1.06675e-52	8.16668e-52
Tfdp1	-1.88969	4.48738	163.759	1.70802e-37	9.78194e-37
Sae1	-1.89144	6.20412	254.508	2.70254e-57	2.24098e-56
Tshz1	-1.89248	4.21188	233.078	1.27093e-52	9.71935e-52
Smarce1	-1.89266	5.88653	221.286	4.74204e-50	3.44949e-49
Prps1l3	-1.89312	5.18576	183.874	6.91124e-42	4.35815e-41
Mtf2	-1.89423	3.8009	231.194	3.2727e-52	2.48799e-51
Tfam	-1.8974	4.94059	238.799	7.18802e-54	5.60594e-53
Terf2	-1.89862	3.68036	202.025	7.55123e-46	5.12203e-45
Nudt21	-1.90232	5.58176	243.547	6.62829e-55	5.26509e-54
Zranb2	-1.90575	5.82941	210.36	1.14621e-47	7.99298e-47
Nol7	-1.90587	6.3628	246.263	1.6954e-55	1.36354e-54
Nt5c2	-1.90824	4.28485	247.458	9.30284e-56	7.52032e-55
Gm17821	-1.90976	4.11929	224.143	1.12931e-50	8.33475e-50
Bzw2	-1.91726	5.39147	251.548	1.19386e-56	9.77943e-56
Gtf2h3	-1.91751	3.62635	188.851	5.66289e-43	3.62912e-42
Pabpc4	-1.9181	5.05569	220.831	5.95719e-50	4.32232e-49
Cnksr3	-1.92261	3.91034	177.91	1.38576e-40	8.43425e-40
Top1	-1.92409	5.36161	81.5193	1.73563e-19	5.96642e-19
Polm	-1.92451	3.07814	227.892	1.71795e-51	1.28942e-50
Limk2	-1.92573	3.17714	197.184	8.59576e-45	5.69153e-44
Rpa1	-1.92631	5.37261	237.319	1.51131e-53	1.17222e-52
Plxna2	-1.9265	3.26212	171.94	2.78907e-39	1.65695e-38
Mycbp	-1.92673	4.87797	261.033	1.02179e-58	8.67602e-58
Tcf19	-1.92817	5.82205	201.911	7.99465e-46	5.40985e-45
Erdr1	-1.9324	5.66084	221.828	3.61087e-50	2.63341e-49
Cenpe	-1.93297	6.21463	162.392	3.3966e-37	1.93197e-36
Sin3a	-1.93746	3.63615	239.505	5.04123e-54	3.94906e-53
Hist1h2ba	-1.9375	5.77658	241.61	1.75286e-54	1.38152e-53
Smarca5	-1.9385	4.58813	186.006	2.36675e-42	1.5045e-41
Phka1	-1.94141	3.65488	241.586	1.77333e-54	1.39687e-53
Gtpbp1	-1.94683	4.07074	211.206	7.49535e-48	5.24489e-47
Ewsr1	-1.94796	3.02465	30.6758	3.0495e-08	6.485e-08
Nop58	-1.95444	3.63831	174.248	8.73938e-40	5.24252e-39
Gltscr2	-1.95501	4.94303	247.268	1.02367e-55	8.2611e-55
Phf2	-1.95689	3.32259	212.22	4.50307e-48	3.15727e-47
Chtf18	-1.96018	4.28969	242.683	1.02251e-54	8.0859e-54
Suv39h1	-1.96051	5.82774	187.1	1.36591e-42	8.71416e-42
Ilf3	-1.96075	4.97701	181.126	2.75158e-41	1.70326e-40
Smg5	-1.96138	4.49226	214.475	1.45071e-48	1.02732e-47
Pidd1	-1.96259	3.13289	203.119	4.35697e-46	2.96672e-45
Dgcr6	-1.96888	6.38039	242.769	9.79504e-55	7.75445e-54
Cisd1	-1.97154	8.5673	286.262	3.24405e-64	3.01677e-63
Cables2	-1.97417	4.99912	194.868	2.75278e-44	1.80415e-43
Gtf2a2	-1.97785	5.19715	253.933	3.60531e-57	2.9826e-56
Serf1	-1.97942	5.56016	244.171	4.84373e-55	3.86053e-54
Mcm4	-1.98327	7.46654	287.406	1.82731e-64	1.70939e-63
Nudt1	-1.98343	4.28433	269.307	1.60711e-60	1.40764e-59
Traf5	-1.98757	3.63829	247.404	9.55728e-56	7.72161e-55
Nrm	-1.9903	5.83762	276.311	4.78198e-62	4.28382e-61
Mark3	-1.99129	4.17688	270.448	9.06505e-61	7.97939e-60
Otud5	-1.99155	5.18592	259.304	2.43379e-58	2.04933e-57
Txnrd3	-1.99235	3.49104	243.676	6.21195e-55	4.93991e-54
Jmjd7	-1.99495	3.14985	216.999	4.08336e-49	2.92527e-48
Rad51ap1	-1.99742	5.14122	276.918	3.52566e-62	3.16438e-61
Mcm3	-1.99919	6.78962	216.46	5.35215e-49	3.82262e-48
Gtse1	-2.00075	3.14277	202.953	4.73533e-46	3.2228e-45
Tpx2	-2.00414	4.90258	286.237	3.28413e-64	3.05205e-63
Lsm6	-2.00744	7.91986	224.739	8.37174e-51	6.2013e-50
Smad3	-2.00823	4.28067	246.922	1.21746e-55	9.8138e-55
Paxip1	-2.00872	4.91897	201.899	8.04523e-46	5.44148e-45
Gab3	-2.00988	6.28308	182.207	1.5977e-41	9.93337e-41
Sephs1	-2.0103	6.03951	293.476	8.69247e-66	8.31273e-65
Srsf3	-2.0121	7.18549	286.488	2.89604e-64	2.69491e-63
Lig1	-2.02134	3.11316	206.065	9.91804e-47	6.81889e-46
Parp1	-2.02201	5.00863	220.379	7.47549e-50	5.40732e-49
Kmt2a	-2.02515	3.5908	248.35	5.94577e-56	4.82578e-55
Dlg3	-2.02714	3.8785	247.874	7.54876e-56	6.11981e-55
Srsf1	-2.03279	6.11152	301.151	1.849e-67	1.80354e-66
Exosc3	-2.03576	4.47317	275.105	8.7557e-62	7.79918e-61
Mbd1	-2.03812	5.31838	195.145	2.39515e-44	1.57267e-43
Pold4	-2.03987	7.57948	282.246	2.43335e-63	2.23065e-62
Pbxip1	-2.04231	7.41139	277.242	2.99665e-62	2.69813e-61
Rpa3	-2.04435	6.83084	274.889	9.76024e-62	8.68306e-61
Rnu1b6	-2.0461	7.05811	95.4108	1.54707e-22	5.87747e-22
Tmem123	-2.04655	6.11362	230.726	4.13936e-52	3.13842e-51
Gm10087	-2.04795	6.02226	269.797	1.25623e-60	1.10303e-59
4930579G24Rik	-2.04898	3.18949	232.616	1.60234e-52	1.22406e-51
Rbm10	-2.0493	5.97144	269.32	1.59616e-60	1.39891e-59
C330027C09Rik	-2.05432	3.681	241.786	1.60431e-54	1.26584e-53
2700049A03Rik	-2.05513	4.82252	284.223	9.02262e-64	8.33034e-63
Dtymk	-2.05629	6.00652	240.615	2.88751e-54	2.26821e-53
Fam193b	-2.05687	3.76122	226.727	3.0848e-51	2.3019e-50
Top3b	-2.05727	4.8313	260.184	1.56489e-58	1.32319e-57
Zfp446	-2.05805	3.20671	234.819	5.30302e-53	4.07967e-52
Ccdc82	-2.05806	3.54181	266.154	7.81716e-60	6.77982e-59
Smc4	-2.06111	7.09974	207.73	4.29612e-47	2.9681e-46
Zc3h7b	-2.06213	3.1591	239.043	6.35925e-54	4.96779e-53
Larp7	-2.07379	6.36004	304.854	2.88634e-68	2.84872e-67
Lmo4	-2.07592	6.56224	261.115	9.80724e-59	8.33233e-58
Klhdc2	-2.08438	4.2404	270.006	1.13163e-60	9.94246e-60
Ube2o	-2.0875	5.60765	274.185	1.38966e-61	1.23242e-60
Lsm5	-2.08798	5.97798	232.255	1.92156e-52	1.46554e-51
Tenm4	-2.08975	3.0676	237.354	1.48442e-53	1.15326e-52
Mir142hg	-2.09034	3.04875	51.0847	8.8465e-13	2.35735e-12
Acyp1	-2.09135	5.68758	305.823	1.77448e-68	1.75748e-67
Prps1	-2.10638	6.30111	249.293	3.70406e-56	3.01324e-55
Rab3a	-2.10876	3.89473	279.439	9.94889e-63	9.03823e-62
Plk4	-2.11052	3.2113	195.083	2.47125e-44	1.62038e-43
Mcm2	-2.11368	5.26649	278.006	2.0423e-62	1.84353e-61
2410006H16Rik	-2.11767	6.51234	253.858	3.74512e-57	3.09644e-56
Aurkb	-2.11964	4.31608	270.644	8.21305e-61	7.23392e-60
Zer1	-2.1212	6.42825	287.399	1.8332e-64	1.71377e-63
Smg6	-2.1217	5.36852	264.09	2.20294e-59	1.89437e-58
Clk1	-2.12959	3.21033	279.879	7.98027e-63	7.26379e-62
Icam2	-2.13545	7.19587	289.987	5.00511e-65	4.72898e-64
Rmi1	-2.13867	3.62201	139.16	4.06382e-32	2.04584e-31
Timeless	-2.14069	3.77184	274.165	1.40332e-61	1.24376e-60
Ncapg	-2.14145	5.67834	288.71	9.49635e-65	8.93073e-64
Ptma	-2.14207	9.31435	285.371	5.07227e-64	4.69841e-63
Tifa	-2.14531	6.47273	287.588	1.66778e-64	1.56326e-63
Cnot2	-2.15166	5.9721	309.207	3.25054e-69	3.26043e-68
Dhx40	-2.15184	5.96839	261.362	8.66329e-59	7.36484e-58
Xpc	-2.15296	4.05008	275.069	8.91548e-62	7.93652e-61
Cbx3	-2.15427	5.98284	307.223	8.79222e-69	8.74468e-68
Smarcd2	-2.15556	5.54553	238.774	7.2767e-54	5.67198e-53
Rab3ip	-2.15742	4.33521	279.29	1.07256e-62	9.7376e-62
2810417H13Rik	-2.16125	7.97541	290.012	4.94186e-65	4.67233e-64
Smc3	-2.16488	5.98252	244.404	4.30932e-55	3.44041e-54
Mcm5	-2.16571	6.5687	277.115	3.19365e-62	2.87003e-61
Ndc80	-2.1663	3.20845	277.457	2.69037e-62	2.4239e-61
Map3k4	-2.16661	6.61207	246.009	1.92528e-55	1.54667e-54
Scap	-2.17294	6.80624	300.221	2.94805e-67	2.87161e-66
Ddah2	-2.18054	5.49429	287.31	1.91731e-64	1.79122e-63
Gm15645	-2.18235	3.10729	272.629	3.03345e-61	2.68182e-60
A430078G23Rik	-2.18252	10.2856	337.695	2.02704e-75	2.21691e-74
Prkd3	-2.18545	6.37774	331.687	4.12377e-74	4.43134e-73
Usp1	-2.18601	5.96525	322.092	5.07164e-72	5.26224e-71
Zbtb12	-2.20604	3.3065	272.432	3.34914e-61	2.95907e-60
Ezr	-2.20919	6.60208	303.009	7.28214e-68	7.16229e-67
Blm	-2.21336	3.52922	305.246	2.37062e-68	2.34463e-67
Trim56	-2.22496	5.70866	367.283	7.30769e-82	8.82343e-81
Nipbl	-2.22905	3.51696	295.1	3.84975e-66	3.69905e-65
Mthfd1l	-2.23148	3.03588	255.989	1.28489e-57	1.0711e-56
Scrn2	-2.23252	3.80167	119.99	6.3584e-28	2.83278e-27
Smtn	-2.23793	3.30829	266.256	7.4295e-60	6.4515e-59
Cpsf2	-2.23806	6.74641	363.851	4.08306e-81	4.88415e-80
Hmgn2	-2.23835	8.83019	340.526	4.90063e-76	5.40137e-75
Acp6	-2.24063	5.89448	347.914	1.2063e-77	1.37008e-76
Ppm1d	-2.24203	3.51079	309.55	2.73682e-69	2.74905e-68
Zfp764	-2.24609	4.82996	335.666	5.60597e-75	6.07478e-74
Ssh2	-2.24816	5.24817	310.637	1.58672e-69	1.59834e-68
Tex30	-2.25224	4.22878	322.463	4.21179e-72	4.37328e-71
Anp32e	-2.25489	6.75979	264.735	1.59383e-59	1.37475e-58
Ckap2	-2.25999	5.04502	316.098	1.02528e-70	1.04845e-69
Nsmce4a	-2.26465	5.65994	348.305	9.91532e-78	1.12886e-76
Pla2g12a	-2.26615	4.7026	335.294	6.75819e-75	7.31776e-74
Dnajc21	-2.27102	3.52683	264.499	1.79438e-59	1.5468e-58
Psmc3ip	-2.27387	5.20882	309.993	2.19204e-69	2.2034e-68
Slbp	-2.27401	3.39158	230.141	5.55455e-52	4.20241e-51
Cirbp	-2.27466	5.46104	342.837	1.53824e-76	1.70737e-75
Gpr157	-2.27605	8.38373	223.934	1.2543e-50	9.24764e-50
Ube2c	-2.27755	6.68069	286.902	2.35228e-64	2.19324e-63
Impdh2	-2.28457	7.46645	379.958	1.271e-84	1.58044e-83
Dnajc9	-2.28473	7.66237	350.333	3.58601e-78	4.10248e-77
Rfc3	-2.28531	5.3045	354.768	3.87944e-79	4.51105e-78
Knstrn	-2.29008	3.71317	295.908	2.56689e-66	2.47649e-65
Wdfy4	-2.29043	8.84754	286.821	2.45002e-64	2.28287e-63
Cux1	-2.29918	3.18845	231.663	2.58574e-52	1.96786e-51
Zbtb5	-2.30757	4.87806	364.697	2.67197e-81	3.20433e-80
Vezf1	-2.30912	4.75893	349.319	5.96349e-78	6.80588e-77
Ncaph	-2.31262	3.52935	284.426	8.15038e-64	7.52993e-63
Trim28	-2.31977	3.65897	289.049	8.01432e-65	7.547e-64
Zfp691	-2.32129	3.32654	280.584	5.60253e-63	5.11926e-62
Trim11	-2.33142	6.61088	326.726	4.96371e-73	5.23462e-72
Exo1	-2.33158	4.34973	350.748	2.91274e-78	3.33763e-77
Stk4	-2.33464	4.28734	351.39	2.11087e-78	2.42271e-77
Rin3	-2.33949	4.28257	366.429	1.12117e-81	1.34911e-80
Tmem39b	-2.34042	3.12566	262.188	5.7227e-59	4.89141e-58
Cbx1	-2.34306	7.08446	353.366	7.83757e-79	9.06151e-78
Haus3	-2.34348	5.95975	352.113	1.46872e-78	1.6898e-77
Cmah	-2.3473	3.7272	324.005	1.94301e-72	2.02642e-71
Dnajc7	-2.36744	7.92849	338.002	1.73777e-75	1.90349e-74
Ly96	-2.36766	4.19261	221.728	3.79803e-50	2.76848e-49
Idua	-2.36851	4.13124	215.174	1.02124e-48	7.25367e-48
Zfp422	-2.37015	5.35089	314.984	1.79317e-70	1.82316e-69
Prim1	-2.37591	5.77556	360.539	2.14943e-80	2.53898e-79
Psg23	-2.3796	9.25694	391.346	4.21526e-87	5.43227e-86
Pou2f1	-2.38261	4.25927	350.282	3.67848e-78	4.20487e-77
Mier3	-2.38707	3.76303	325.938	7.36965e-73	7.76609e-72
S100a16	-2.40238	4.79292	296.527	1.88073e-66	1.81697e-65
Fam110a	-2.40255	6.95215	391.427	4.04866e-87	5.22233e-86
Jund	-2.40845	8.89728	252.813	6.32547e-57	5.20858e-56
Mprip	-2.41244	3.50338	240.158	3.63316e-54	2.85077e-53
5830469G19Rik	-2.41275	3.04851	248.814	4.71033e-56	3.82744e-55
Cntrob	-2.41669	4.21838	329.998	9.62287e-74	1.02859e-72
Mki67	-2.41959	7.52979	380.279	1.08184e-84	1.34759e-83
Hspa2	-2.42627	3.59768	334.559	9.7708e-75	1.05556e-73
Pbx3	-2.42657	4.01537	8.29135	0.00398343	0.00585485
Fxn	-2.42702	4.29498	288.471	1.07076e-64	1.00632e-63
H2afv	-2.43569	9.52382	347.132	1.78529e-77	2.01796e-76
Wrnip1	-2.43635	5.05328	370.333	1.5839e-82	1.92227e-81
Cd1d1	-2.43871	4.90379	361.3	1.46729e-80	1.74047e-79
LOC102641638	-2.44087	8.50668	285.903	3.8848e-64	3.60789e-63
E2f7	-2.44167	3.53504	304.099	4.21469e-68	4.15687e-67
Hmgb1	-2.44222	8.99074	275.31	7.89926e-62	7.04517e-61
Ncapd3	-2.44475	4.31338	382.423	3.6926e-85	4.64461e-84
Wdr6	-2.45396	3.52519	329.681	1.12766e-73	1.20445e-72
Foxn3	-2.45774	4.36124	301.707	1.39885e-67	1.36917e-66
Tmpo	-2.4868	6.67033	393.404	1.50261e-87	1.95782e-86
B9d1	-2.48727	3.81282	374.39	2.07232e-83	2.53456e-82
AI426330	-2.48928	3.51338	329.364	1.32243e-73	1.41036e-72
B9d2	-2.49362	7.36023	419.111	3.80992e-93	5.41767e-92
Stambpl1	-2.49798	5.78241	434.803	1.46417e-96	2.18745e-95
Hist1h4d	-2.50369	10.0923	344.28	7.45888e-77	8.36422e-76
Spc24	-2.50421	6.11687	415.206	2.69726e-92	3.76739e-91
Zkscan17	-2.50881	6.48385	84.982	3.01089e-20	1.06369e-19
Rrm2	-2.514	8.02315	417.858	7.14111e-93	1.00636e-91
Cbx4	-2.51542	6.16258	360.756	1.92723e-80	2.28031e-79
Nfkbie	-2.518	5.36812	362.753	7.08302e-81	8.43707e-80
Lyar	-2.52271	5.97379	345.571	3.90555e-77	4.39352e-76
Ctcf	-2.52446	5.58834	420.168	2.24301e-93	3.19595e-92
C2cd5	-2.53017	4.26663	425.612	1.46527e-94	2.12412e-93
Phf6	-2.53179	5.41481	381.935	4.71665e-85	5.90645e-84
Tipin	-2.53264	6.56275	398.595	1.11357e-88	1.47122e-87
Gas5	-2.53638	6.84966	229.79	6.62587e-52	5.00759e-51
Gm4841	-2.54586	4.97942	369.486	2.42127e-82	2.93349e-81
A530030E21Rik	-2.55651	5.77242	242.532	1.10295e-54	8.71709e-54
Asrgl1	-2.55697	3.83132	343.737	9.79477e-77	1.09317e-75
Supt7l	-2.56107	4.50123	350.801	2.83581e-78	3.25211e-77
Ktn1	-2.56364	4.3	332.592	2.61984e-74	2.81952e-73
Rabgap1l	-2.5685	3.4305	386.842	4.03093e-86	5.14788e-85
Gm5176	-2.56944	7.5738	437.469	3.84808e-97	5.77946e-96
Unkl	-2.59347	3.06187	378.501	2.63786e-84	3.27145e-83
Neil3	-2.59721	3.85131	357.111	1.19844e-79	1.40393e-78
Hmgn5	-2.59971	4.56502	424.722	2.28919e-94	3.31173e-93
Cdca5	-2.6053	6.34278	395.373	5.59905e-88	7.34253e-87
Xrcc1	-2.60794	7.64792	403.595	9.08573e-90	1.22088e-88
Dgka	-2.60941	4.8417	376.235	8.21722e-84	1.01554e-82
Rfc4	-2.61078	4.7309	402.601	1.49538e-89	1.99992e-88
Gprasp1	-2.61457	3.12404	314.52	2.26243e-70	2.29533e-69
Top2b	-2.61626	4.22684	403.447	9.78691e-90	1.31386e-88
Fbxo5	-2.61751	5.62679	392.765	2.06953e-87	2.68906e-86
Dyrk1b	-2.62083	4.2673	438.919	1.86113e-97	2.80118e-96
Gse1	-2.62387	4.85097	315.493	1.38909e-70	1.41741e-69
Hist2h4	-2.62915	9.31498	376.127	8.67448e-84	1.07111e-82
Zfp663	-2.63423	5.62395	309.529	2.76535e-69	2.77574e-68
Mcm7	-2.63674	7.34037	431.312	8.41908e-96	1.24467e-94
Sdr39u1	-2.64077	4.42931	374.791	1.69424e-83	2.07933e-82
Stk38l	-2.65263	3.89087	374.403	2.05874e-83	2.52013e-82
Elovl6	-2.65625	5.51091	436.811	5.35207e-97	8.0298e-96
Cenpn	-2.6576	6.2291	450.171	6.61967e-100	1.01907e-98
Pigr	-2.66016	7.44175	421.337	1.24876e-93	1.78289e-92
Net1	-2.66063	5.18379	166.226	4.93817e-38	2.86167e-37
Taf4b	-2.67817	3.15224	324.386	1.60568e-72	1.67956e-71
Bcor	-2.68305	4.66683	447.063	3.14333e-99	4.80766e-98
Casc5	-2.6839	3.79689	291.404	2.45859e-65	2.33385e-64
Rcc2	-2.69355	7.87047	399.361	7.58478e-89	1.00396e-87
Ctps	-2.69466	4.72533	407.72	1.14902e-90	1.56627e-89
Usp11	-2.6994	3.83514	336.565	3.57271e-75	3.88635e-74
Hirip3	-2.70144	5.26127	477.648	6.94431e-106	1.1423e-104
Casp2	-2.70494	7.11819	452.778	1.79313e-100	2.78467e-99
Plekha2	-2.70624	7.7056	417.065	1.06249e-92	1.49138e-91
Hist1h4k	-2.71325	9.37655	412.847	8.79974e-92	1.22067e-90
Agpat9	-2.71328	5.54045	409.824	4.00355e-91	5.49974e-90
Ap1s3	-2.71468	3.57163	407.912	1.04375e-90	1.42552e-89
Cenpf	-2.72231	5.1028	377.176	5.12676e-84	6.34151e-83
Msh2	-2.7306	6.47851	436.129	7.53197e-97	1.12765e-95
Dok3	-2.73141	5.4111	451.94	2.72782e-100	4.21309e-99
Ccng2	-2.73266	5.46899	506.511	3.64111e-112	6.44612e-111
Snhg5	-2.73461	5.24219	424.411	2.67509e-94	3.86605e-93
AA522020	-2.73618	3.98041	239.662	4.66117e-54	3.65336e-53
C1galt1	-2.74304	3.2695	321.361	7.31732e-72	7.57567e-71
Ccp110	-2.76247	3.14258	360.649	2.03401e-80	2.40465e-79
Msh6	-2.76823	6.68266	495.467	9.21204e-110	1.57573e-108
Hnrnph3	-2.77285	6.14757	392.02	3.00669e-87	3.88893e-86
Nalcn	-2.7778	4.25656	321.843	5.74799e-72	5.95965e-71
Dcc	-2.78135	6.63776	141.32	1.36963e-32	6.9727e-32
Fam216a	-2.78192	5.39436	405.71	3.14734e-90	4.25341e-89
Limd2	-2.79092	4.85526	362.365	8.60249e-81	1.02384e-79
Snap25	-2.79598	3.61166	250.644	1.87995e-56	1.5364e-55
Birc2	-2.80114	3.48692	406.696	1.91986e-90	2.60949e-89
Dyrk2	-2.82071	3.76701	433	3.61447e-96	5.38295e-95
LOC105243204	-2.83014	3.46794	360.001	2.81455e-80	3.32188e-79
Tnk2	-2.8327	5.45683	539.483	2.44295e-119	4.72026e-118
Dnaaf5	-2.83417	5.40963	425.836	1.30959e-94	1.90233e-93
Vars	-2.83952	4.57634	358.48	6.03489e-80	7.10492e-79
Pold1	-2.84244	6.885	457.028	2.13179e-101	3.34358e-100
Hist1h4c	-2.85818	4.37568	344.075	8.26824e-77	9.24985e-76
N4bp3	-2.86629	6.16033	458.883	8.41157e-102	1.32665e-100
Btnl10	-2.86706	3.00341	45.3541	1.64447e-11	4.13762e-11
Cks2	-2.88013	7.2015	452.57	1.98974e-100	3.08323e-99
Slc17a5	-2.90975	3.50398	298.692	6.35044e-67	6.16036e-66
Mybl2	-2.91446	5.45704	395.765	4.60149e-88	6.04554e-87
Ift80	-2.92082	3.59626	382.472	3.60327e-85	4.53628e-84
Serinc5	-2.92656	5.90709	535.799	1.54641e-118	2.96371e-117
Fgf23	-2.93504	3.90332	234.152	7.41158e-53	5.68636e-52
Nmral1	-2.9447	5.92133	114.979	7.95468e-27	3.43377e-26
Hist1h4j	-2.94661	5.00802	419.913	2.54914e-93	3.62849e-92
Trim27	-2.95555	3.05571	315.036	1.74647e-70	1.77695e-69
Herpud1	-2.95707	4.00495	449.624	8.70825e-100	1.33914e-98
Hist4h4	-2.97531	7.10695	448.442	1.57434e-99	2.41313e-98
Hmgb1-rs17	-2.97861	8.47554	501.329	4.8848e-111	8.437e-110
Sesn3	-2.98663	3.45103	490.656	1.02605e-108	1.73205e-107
Inafm2	-2.99716	3.72497	418.292	5.74314e-93	8.12588e-92
Prodh	-3.01141	3.79768	200.033	2.05459e-45	1.3778e-44
Rhox8	-3.05771	6.41091	136.432	1.60517e-31	7.93511e-31
Hnrnph1	-3.05834	7.86695	502.913	2.20872e-111	3.84773e-110
Trp53inp1	-3.06282	5.99997	493.397	2.5988e-109	4.41858e-108
Chchd10	-3.07129	10.431	624.186	9.18978e-138	2.12671e-136
Map4k2	-3.09858	3.44665	525.773	2.34755e-116	4.37479e-115
Gltscr1	-3.11351	3.18754	518.389	9.48641e-115	1.72694e-113
Hmgb2	-3.12982	9.21253	548.155	3.17183e-121	6.26537e-120
Card11	-3.13181	3.06773	492.969	3.21972e-109	5.46119e-108
Prep	-3.13193	6.67014	619.814	8.20784e-137	1.88408e-135
3930401B19Rik	-3.13956	5.69387	600.851	1.09334e-132	2.43858e-131
Ahdc1	-3.16094	3.11009	423.097	5.16867e-94	7.44699e-93
Hist1h3i	-3.162	3.05858	466.749	1.63364e-103	2.62924e-102
Rbm38	-3.17834	6.52109	631.913	1.91767e-139	4.50414e-138
Dync2h1	-3.18785	3.03642	489.041	2.30361e-108	3.85195e-107
Lmnb1	-3.19367	6.68063	244.187	4.80535e-55	3.8321e-54
Hist1h2ab	-3.20168	9.44248	537.219	7.5935e-119	1.46123e-117
Pask	-3.23033	4.61291	504.462	1.01633e-111	1.78589e-110
Nusap1	-3.23346	6.19668	635.941	2.55084e-140	6.0515e-139
Hist1h1e	-3.23536	8.33781	257.776	5.2407e-58	4.40499e-57
Cyp39a1	-3.24663	3.08073	302.788	8.13636e-68	7.9969e-67
Ptprc	-3.25929	5.36959	502.888	2.23718e-111	3.89253e-110
Psip1	-3.26072	3.5119	477.269	8.39518e-106	1.37936e-104
Epg5	-3.26508	4.26182	619.875	7.96071e-137	1.83032e-135
Arpc5l	-3.29038	6.68582	597.856	4.89991e-132	1.09115e-130
Lig4	-3.2987	4.04879	591.834	1.00002e-130	2.18231e-129
2021-09-06	-3.31105	3.52796	548.618	2.51603e-121	4.98386e-120
Pdcd4	-3.31261	4.31107	494.604	1.41901e-109	2.42137e-108
Tapt1	-3.33306	3.92755	513.824	9.33945e-114	1.67861e-112
Il16	-3.41357	5.60795	714.196	2.44781e-157	6.57842e-156
Hist1h3f	-3.43087	3.33995	508.272	1.50711e-112	2.67484e-111
Foxp4	-3.44311	5.71968	588.619	5.00327e-130	1.0802e-128
Pafah1b3	-3.46918	8.02929	757.631	8.79377e-167	2.50596e-165
Prkca	-3.48223	3.15074	535.465	1.82777e-118	3.4982e-117
Arid3b	-3.49255	3.14747	524.613	4.1973e-116	7.78095e-115
Slc16a1	-3.50226	6.34547	746.398	2.43506e-164	6.80233e-163
Ccnd3	-3.52548	9.05595	850.683	5.1663e-187	1.74631e-185
Hist2h3b	-3.55324	6.17034	644.773	3.06059e-142	7.39713e-141
Cd2	-3.55355	5.61763	758.014	7.25835e-167	2.07258e-165
Hist1h3c	-3.57159	8.04118	645.859	1.77729e-142	4.30288e-141
Elk4	-3.58759	4.15833	596.225	1.10882e-131	2.44997e-130
Pkig	-3.60633	3.33154	526.625	1.5321e-116	2.85892e-115
Cstf2	-3.60756	3.02914	372.951	4.26248e-83	5.19978e-82
Ezh2	-3.6113	5.98902	773.74	2.76376e-170	8.13786e-169
Rasgrp2	-3.63405	5.13324	783.398	2.19615e-172	6.64618e-171
Fam53b	-3.64212	4.92835	427.761	4.99092e-95	7.30231e-94
Hist1h1d	-3.65329	4.80192	616.579	4.14757e-136	9.47453e-135
E130308A19Rik	-3.65336	3.53192	596.983	7.58621e-132	1.68407e-130
Dut	-3.65839	6.14388	712.884	4.72012e-157	1.26612e-155
Grtp1	-3.65869	3.65675	673.245	1.96782e-148	4.97683e-147
Zfp428	-3.66937	5.2869	700.692	2.11482e-154	5.57769e-153
Fam107b	-3.67703	7.08446	649.804	2.46481e-143	6.02921e-142
Spn	-3.72994	6.23635	753.511	6.91971e-166	1.96008e-164
Psrc1	-3.74002	4.72208	813.726	5.59528e-179	1.78482e-177
1190002F15Rik	-3.76703	5.71388	817.004	1.08412e-179	3.49758e-178
Nup210	-3.84824	7.98724	922.64	1.17542e-202	4.34661e-201
Phgdh	-3.84955	7.34249	916.421	2.64336e-201	9.69893e-200
Hmgn3	-3.86488	4.27989	809.239	5.28986e-178	1.6649e-176
Xrcc6	-3.86685	7.69474	848.152	1.83404e-186	6.18463e-185
1700097N02Rik	-3.88123	3.83031	517.229	1.69595e-114	3.07158e-113
Slc1a5	-3.9002	6.94458	661.78	6.12692e-146	1.52238e-144
Gm6756	-3.90806	6.65777	892.557	4.07321e-196	1.44222e-194
Mmp11	-3.93261	3.93712	801.66	2.35001e-176	7.28298e-175
Msi2	-3.96847	4.9825	200.074	2.01197e-45	1.34986e-44
Pard6g	-3.98743	3.52913	714.748	1.85661e-157	4.99908e-156
Hist1h1a	-4.02235	5.29837	694.65	4.3559e-153	1.13406e-151
Csrp2	-4.02473	6.17912	967.86	1.74006e-212	6.88394e-211
Mns1	-4.03837	3.00973	586.291	1.60539e-129	3.43462e-128
Gm8096	-4.08081	4.05676	287.075	2.15715e-64	2.01263e-63
Gramd4	-4.10141	4.63276	813.516	6.21617e-179	1.97842e-177
Rgs12	-4.20834	5.07421	560.477	6.62011e-124	1.33944e-122
Foxo1	-4.23307	6.13312	685.78	3.69748e-151	9.55609e-150
Agap2	-4.27506	3.08845	668.25	2.40018e-147	6.00596e-146
Prkd2	-4.32113	4.89467	774.966	1.4966e-170	4.42513e-169
Eya4	-4.36624	3.2245	10.7294	0.00105444	0.00164165
Gm42102	-4.37757	5.85275	1048.5	5.16126e-230	2.30596e-228
D10Bwg1070e	-4.41224	3.70245	867.271	1.27871e-190	4.39573e-189
E2f2	-4.50961	7.50119	777.405	4.4134e-171	1.31594e-169
Tfdp2	-4.5311	3.05722	730.418	7.26522e-161	2.00189e-159
Slc22a17	-4.55635	3.00455	22.4168	2.19449e-06	4.1961e-06
Mgst2	-4.62276	7.35859	998.378	4.04445e-219	1.68972e-217
Tas2r113	-4.64112	6.78364	985.194	2.96854e-216	1.22575e-214
Slc30a4	-4.65482	5.60112	969.154	9.10174e-213	3.62101e-211
Ptp4a3	-4.67348	5.85352	1099.66	3.91356e-241	1.94483e-239
Tspan13	-4.67757	8.25734	954.856	1.16722e-209	4.49222e-208
Rcor2	-4.69083	4.36848	1116.03	1.08613e-244	5.71852e-243
Glcci1	-4.70898	5.42812	1047.79	7.34067e-230	3.25912e-228
Tob2	-4.82665	3.94047	683.787	1.00333e-150	2.58366e-149
Pde2a	-4.88371	9.42425	1394.13	3.95537e-305	3.0281e-303
Fbxl12	-4.88813	7.02552	977.352	1.50343e-214	6.11868e-213
Tgfb3	-4.9387	6.67866	1342.43	6.79438e-294	4.74034e-292
Acap1	-4.94674	3.62352	806.697	1.88834e-177	5.87793e-176
Rapgefl1	-4.95151	3.73194	565.079	6.6044e-125	1.34976e-123
Crlf1	-4.99136	5.49167	1108.62	4.42905e-243	2.26457e-241
Nxpe3	-5.04635	4.70607	1076.2	4.91238e-236	2.29617e-234
Zfp296	-5.05118	3.22815	392.766	2.06907e-87	2.68906e-86
Myh10	-5.10105	4.95876	38.2255	6.30224e-10	1.46735e-09
Mbnl3	-5.12832	4.05682	1035.49	3.47445e-227	1.51411e-225
Slco4a1	-5.13006	4.68556	1056.32	1.03054e-231	4.64826e-230
Ltb	-5.2165	7.14754	1342.81	5.61437e-294	3.93645e-292
Itgb3	-5.23328	4.00627	903.965	1.3487e-198	4.87287e-197
Otub2	-5.25471	5.98573	1266.35	2.31844e-277	1.47247e-275
Fhod3	-5.2699	3.86879	833.741	2.49072e-183	8.20372e-182
N4bp2	-5.36525	3.2175	809.556	4.51272e-178	1.42664e-176
Defa-rs2	-5.48234	3.016	394.499	8.67836e-88	1.13283e-86
Cpne5	-5.50409	4.46818	1079.01	1.20793e-236	5.72172e-235
9330175E14Rik	-5.52949	4.48133	1109.62	2.67527e-243	1.37781e-241
[truncated: 42 more rows]

## Sheet: Suppl.Table 2 _BBC4TCMvBF480MC4
Genename	logFC	logCPM	LR	PValue	FDR
Ankrd23	7.20934	4.0449	15.5972	7.83714e-05	0.000307728
Slc9a8	6.0624	3.70925	18.4919	1.70626e-05	7.5236e-05
Sh2d5	5.11424	3.22034	15.5441	8.06007e-05	0.000315442
Prdm14	5.11394	3.85973	20.1111	7.30721e-06	3.42802e-05
Atp13a3	4.79817	4.44046	21.2981	3.93111e-06	1.93724e-05
Id3	4.38526	5.04473	931.729	1.2428e-204	1.60017e-201
Tubb2b	4.20279	5.42573	740.281	5.20873e-163	3.20745e-160
Chid1	3.77171	4.54474	19.1731	1.19384e-05	5.41241e-05
Gchfr	3.6431	4.08036	594.489	2.6458e-131	1.0409e-128
Ctu1	3.47615	3.58826	17.7904	2.46629e-05	0.000106271
Tnfrsf13c	3.4055	4.74635	102.791	3.72467e-24	7.7011e-23
Dhcr24	3.32635	6.43835	734.524	9.29966e-162	5.48796e-159
Gcat	3.24354	4.80721	479.7	2.48298e-106	6.76277e-104
Cd19	3.17119	7.39602	111.165	5.44571e-26	1.22815e-24
Tfrc	3.07891	5.04729	501.07	5.55992e-111	1.60704e-108
Fdps	3.04154	7.802	569.778	6.27473e-126	2.22172e-123
Vpreb3	2.94482	9.9351	190.142	2.95983e-43	1.39269e-41
Cyp51	2.79492	5.08893	503.578	1.58287e-111	4.67047e-109
Pdlim4	2.76538	5.35328	364.933	2.37433e-81	3.65517e-79
Smagp	2.75178	4.7445	413.659	5.8568e-92	1.20217e-89
St6gal1	2.74853	4.96828	450.985	4.40261e-100	1.07507e-97
Sqle	2.71779	6.75303	368.742	3.5159e-82	5.59502e-80
Idi1	2.65521	6.63234	438.143	2.74505e-97	6.47969e-95
Rapsn	2.58741	3.41316	198.332	4.82802e-45	2.50473e-43
St3gal5	2.54812	6.09758	423.209	4.8869e-94	1.04868e-91
Hmgb3	2.5419	5.80763	340.439	5.12046e-76	7.1099e-74
Fasn	2.50554	7.72043	462.108	1.67206e-102	4.38544e-100
Hist2h2be	2.48587	3.72968	332.587	2.62632e-74	3.44413e-72
Atp2a3	2.40887	4.89839	281.247	4.01742e-63	3.74333e-61
Serpinb1a	2.40168	6.01609	346.913	1.99248e-77	2.82195e-75
Sapcd2	2.39227	5.56349	314.406	2.39553e-70	2.85109e-68
Pdzk1ip1	2.36392	5.32026	269.329	1.58928e-60	1.38092e-58
Fdft1	2.34453	5.86721	287.355	1.87465e-64	1.83108e-62
Fam64a	2.3323	6.09345	366.135	1.29908e-81	2.02186e-79
Gas6	2.30752	8.95316	275.684	6.54792e-62	5.94475e-60
Ckb	2.28243	3.79322	264.415	1.87119e-59	1.54981e-57
Gm5593	2.28184	5.96952	333.454	1.7006e-74	2.25098e-72
Tk1	2.27313	5.9543	285.31	5.23049e-64	5.03941e-62
Hmgcs1	2.26398	7.55175	351.438	2.0603e-78	3.07158e-76
Racgap1	2.25038	3.00058	228.918	1.02624e-51	6.76027e-50
Pou2af1	2.19537	8.72742	67.8885	1.73008e-16	2.34479e-15
Msmo1	2.17979	5.54581	257.558	5.84534e-58	4.5993e-56
Plk1	2.16196	6.90284	268.563	2.33443e-60	2.00379e-58
Vwf	2.15402	4.88894	216.66	4.84001e-49	2.953e-47
Mnd1	2.13928	4.77891	201.889	8.08497e-46	4.27266e-44
Aunip	2.13235	3.3203	197.857	6.13192e-45	3.15805e-43
Bub1b	2.11614	4.22553	202.974	4.68693e-46	2.49552e-44
Mc3r	2.06745	5.85474	169.981	7.47057e-39	3.03168e-37
Ankle1	2.04481	3.24993	186.774	1.60888e-42	7.47099e-41
Cdca3	2.00905	6.28293	215.381	9.20459e-49	5.50061e-47
Pmp22	1.97692	8.61326	238.486	8.41056e-54	5.89697e-52
Ccbl2	1.97344	3.92928	212.051	4.90247e-48	2.88107e-46
Cdc20	1.95962	7.29631	212.204	4.54037e-48	2.67939e-46
Hist1h1b	1.95906	7.83609	104.553	1.53034e-24	3.22054e-23
Tpcn1	1.95565	6.07338	218.024	2.44054e-49	1.50284e-47
Ccna2	1.94823	7.05302	247.855	7.62247e-56	5.62277e-54
Aspm	1.94815	4.66024	196.477	1.22633e-44	6.18097e-43
Usp3	1.94486	3.99231	8.26845	0.00403399	0.0104468
Ifi27	1.93529	3.72522	230.423	4.82049e-52	3.22041e-50
Birc5	1.93511	4.80812	229.535	7.52964e-52	4.98328e-50
Cdc25c	1.93139	3.74175	195.492	2.01212e-44	9.96421e-43
2900026A02Rik	1.92527	4.64856	147.121	7.38531e-34	2.44388e-32
Grap	1.91883	4.52127	244.581	3.9435e-55	2.83512e-53
Tbc1d16	1.90566	3.24146	191.453	1.53138e-43	7.27815e-42
Tuba1a	1.88	8.1581	245.277	2.78117e-55	2.01998e-53
Lrrc20	1.87826	3.59969	178.744	9.11362e-41	3.98384e-39
Aacs	1.87401	5.32573	201.592	9.38687e-46	4.94224e-44
Smo	1.84915	3.81061	173.938	1.02101e-39	4.3166e-38
Ccnb1	1.84588	6.10426	222.707	2.32247e-50	1.48838e-48
Gale	1.83956	5.29943	71.7497	2.44303e-17	3.48445e-16
Cd28	1.83802	6.10367	185.99	2.3861e-42	1.10079e-40
Ccnb2	1.83532	7.69533	251.272	1.37138e-56	1.02766e-54
Shcbp1	1.83494	5.51684	216.492	5.26723e-49	3.18802e-47
Tmem132a	1.82607	3.50782	143.753	4.0239e-33	1.28647e-31
Arhgap22	1.81705	4.85173	169.156	1.1311e-38	4.56405e-37
Tacc3	1.81406	4.82454	211.512	6.42705e-48	3.73059e-46
Pafah2	1.81328	4.03346	213.284	2.63857e-48	1.5636e-46
Scd2	1.81024	8.06679	230.104	5.6594e-52	3.76311e-50
Hsd17b7	1.7982	4.70953	164.158	1.39683e-37	5.27553e-36
Tom1l1	1.79541	3.67597	200.423	1.68845e-45	8.8242e-44
Espl1	1.79502	5.06862	185.045	3.83612e-42	1.75261e-40
Dusp2	1.78654	8.17542	230.557	4.50744e-52	3.02554e-50
Abhd14b	1.78211	3.40218	126.263	2.6931e-29	7.27909e-28
Kif4	1.7749	3.01466	114.264	1.14072e-26	2.67483e-25
Abcb8	1.77294	5.16512	195.72	1.79426e-44	8.91652e-43
S100a4	1.76604	9.38973	185.844	2.56739e-42	1.18058e-40
Ccnf	1.75167	6.57084	158.758	2.11347e-36	7.57801e-35
Cenph	1.7337	4.34435	141.281	1.39654e-32	4.3092e-31
Spag5	1.72494	4.19782	164.564	1.13911e-37	4.33688e-36
Asf1b	1.72425	7.48933	222.997	2.00791e-50	1.29264e-48
Gm15421	1.71999	8.89842	148.411	3.85691e-34	1.29752e-32
Nek2	1.70832	3.31129	113.983	1.31402e-26	3.06598e-25
Gm11223	1.70384	8.34104	197.719	6.56977e-45	3.37129e-43
Rnpep	1.69806	5.12968	12.8988	0.000328797	0.00112292
Lrr1	1.68886	3.30796	150.615	1.27188e-34	4.36165e-33
Kif20a	1.66622	5.2471	167.59	2.48648e-38	9.83688e-37
Gclc	1.66244	4.94206	196.429	1.25621e-44	6.3091e-43
Dhcr7	1.65841	3.58316	130.969	2.51459e-30	6.98318e-29
Cks1b	1.65558	7.33465	160.357	9.45647e-37	3.43415e-35
Neurl2	1.65157	4.85853	172.192	2.45733e-39	1.01467e-37
Cdkn2c	1.64955	5.63685	112.494	2.78448e-26	6.37102e-25
Pbk	1.64472	4.39871	149.461	2.2743e-34	7.72443e-33
Aldh1l1	1.64272	5.04395	166.067	5.34869e-38	2.08687e-36
Kif22	1.63898	6.98254	163.343	2.10494e-37	7.88684e-36
Cdk18	1.63621	6.21341	122.723	1.60364e-28	4.16739e-27
Olfr1466	1.63127	7.21913	114.509	1.00808e-26	2.37956e-25
Kif11	1.62178	3.12885	108.138	2.50643e-25	5.50366e-24
2700094K13Rik	1.61603	7.06841	169.99	7.43743e-39	3.0269e-37
Fcrls	1.61528	3.43591	146.975	7.94587e-34	2.62325e-32
Cbr2	1.60459	7.6335	148.735	3.27701e-34	1.10769e-32
Rpl22l1	1.59964	9.11103	112.731	2.47175e-26	5.69225e-25
Cenpv	1.59584	3.88617	167.512	2.58599e-38	1.0202e-36
Cdca7	1.59504	6.39939	141.9	1.02282e-32	3.16986e-31
Nsdhl	1.58585	3.99632	147.16	7.24156e-34	2.40193e-32
Stmn1	1.57996	8.28881	192.095	1.10922e-43	5.2895e-42
Lbx2	1.57892	3.52497	133.411	7.35048e-31	2.11166e-29
Nuf2	1.57164	5.14985	165.778	6.18571e-38	2.40022e-36
Depdc1b	1.57137	4.89205	139.246	3.89155e-32	1.17518e-30
0610009L18Rik	1.57137	3.18984	160.606	8.34339e-37	3.05342e-35
BC094435	1.57056	5.48744	148.256	4.1698e-34	1.39945e-32
Cyfip2	1.56785	6.94903	124.809	5.60467e-29	1.4949e-27
Lrrc75a	1.56048	4.21408	154.209	2.08433e-35	7.27103e-34
Ska1	1.55656	4.37986	138.506	5.64953e-32	1.69459e-30
Scarb1	1.55282	5.91691	145.9	1.36543e-33	4.47654e-32
Kntc1	1.55062	3.20376	117.441	2.2983e-27	5.6219e-26
Fanci	1.55039	3.52731	130.011	4.07509e-30	1.12287e-28
H2afx	1.54622	8.58269	167.248	2.95283e-38	1.15847e-36
Bend4	1.54456	3.07341	119.087	1.00234e-27	2.50373e-26
Mzb1	1.54059	7.76618	32.685	1.08371e-08	7.56463e-08
Adam19	1.53635	3.5275	105.526	9.36634e-25	1.98884e-23
Cdc14b	1.5336	3.90894	135.804	2.20261e-31	6.43207e-30
Lbr	1.52977	8.48901	136.974	1.22149e-31	3.60416e-30
Sec24d	1.52866	3.00237	48.9752	2.59218e-12	2.57998e-11
D830050J10Rik	1.52644	4.17269	123.501	1.08357e-28	2.84196e-27
Raet1e	1.52033	3.15454	134.834	3.58956e-31	1.03965e-29
Galnt12	1.51241	5.08634	119.869	6.75935e-28	1.70647e-26
Mt2	1.51232	8.03174	144.04	3.48142e-33	1.11555e-31
Ada	1.50704	4.20459	142.411	7.9069e-33	2.48856e-31
Cat	1.50259	6.56554	140.662	1.90746e-32	5.83486e-31
Arhgef15	-1.50876	9.53377	118.202	1.56611e-27	3.87775e-26
Slamf7	-1.51321	4.23959	132.503	1.16106e-30	3.30202e-29
Gm10134	-1.51325	3.19376	116.869	3.06633e-27	7.43637e-26
Ero1l	-1.51348	6.41594	173.734	1.13138e-39	4.7548e-38
Gm1966	-1.51512	4.44011	106.322	6.26736e-25	1.34288e-23
Hif1a	-1.5153	6.79007	144.316	3.03017e-33	9.77592e-32
Tnfrsf1b	-1.52422	5.35281	170.53	5.66778e-39	2.31334e-37
Il4ra	-1.52644	3.90928	99.2589	2.21559e-23	4.39488e-22
Bcar3	-1.5274	5.82148	168.625	1.47769e-38	5.91202e-37
Ctsk	-1.53183	4.67303	6.70179	0.00963164	0.0223335
Prm1	-1.53446	3.46126	77.059	1.65922e-18	2.51602e-17
Siglecg	-1.54955	3.10917	55.7852	8.08366e-14	8.92353e-13
Gm4907	-1.55015	4.49147	136.275	1.73699e-31	5.11455e-30
Gbp7	-1.55152	3.87657	157.678	3.63827e-36	1.29796e-34
Ctsh	-1.5663	8.80092	182.596	1.31379e-41	5.85133e-40
H2-Q10	-1.57345	6.71666	173.963	1.00852e-39	4.27656e-38
H2-DMa	-1.57533	4.81832	162.668	2.95656e-37	1.09617e-35
Gpr132	-1.57593	5.04758	165.279	7.94871e-38	3.05917e-36
Mfge8	-1.58046	9.37567	177.306	1.87786e-40	8.10859e-39
Ifih1	-1.58384	4.91012	178.814	8.79613e-41	3.85695e-39
Gbp2b	-1.59247	4.1931	162.885	2.65048e-37	9.90468e-36
Stat1	-1.59258	6.33741	153.084	3.67149e-35	1.26828e-33
Lcn2	-1.59349	3.39843	108.993	1.62844e-25	3.59807e-24
Spns3	-1.5959	4.41752	29.07	6.98101e-08	4.42777e-07
Errfi1	-1.59629	4.25257	116.651	3.423e-27	8.27304e-26
H2-M2	-1.59757	7.81902	162.118	3.89903e-37	1.43807e-35
Xaf1	-1.59898	6.0306	192.898	7.41001e-44	3.56966e-42
Agrn	-1.59902	4.38636	159.579	1.39813e-36	5.05146e-35
Tmprss3	-1.60342	9.46767	136.27	1.74193e-31	5.11844e-30
Phf11a	-1.60856	6.41379	178.499	1.03074e-40	4.47802e-39
Gcm1	-1.6116	6.56513	30.483	3.36798e-08	2.22381e-07
Smox	-1.62048	3.48442	141.313	1.37454e-32	4.25056e-31
Fbxl5	-1.62126	4.37902	162.504	3.21041e-37	1.18718e-35
Tox2	-1.62541	4.36766	102.749	3.80378e-24	7.85319e-23
Grasp	-1.6281	3.11774	61.8272	3.74951e-15	4.62984e-14
Slc1a4	-1.63007	9.727	140.806	1.77374e-32	5.43755e-31
Il6st	-1.63096	4.2514	153.786	2.57964e-35	8.97677e-34
Bmf	-1.63519	5.35099	146.727	9.00482e-34	2.95906e-32
Nupr1l	-1.63892	6.32643	57.297	3.74718e-14	4.25933e-13
Dcaf12l2	-1.64438	3.7189	123.938	8.69178e-29	2.28389e-27
Oas3	-1.64451	4.32613	131.596	1.83358e-30	5.1322e-29
Ier3	-1.6524	6.77309	173.031	1.61109e-39	6.69144e-38
Ifit1	-1.66484	4.51326	127.543	1.41293e-29	3.84833e-28
Fgl1	-1.66797	8.8862	149.648	2.06982e-34	7.06383e-33
Mycbp2	-1.67253	4.77673	183.668	7.66734e-42	3.46941e-40
Tnfrsf21	-1.67267	3.69273	155.497	1.09047e-35	3.84187e-34
Pdia4	-1.67801	5.17354	102.163	5.11269e-24	1.0464e-22
Mthfsd	-1.68054	4.49265	107.513	3.4363e-25	7.47594e-24
Ahr	-1.69095	4.29441	161.039	6.70745e-37	2.46108e-35
Cd22	-1.69328	3.18742	161.917	4.31301e-37	1.58663e-35
Oas1d	-1.69473	5.08828	154.691	1.63584e-35	5.72061e-34
Mxi1	-1.70176	5.75454	185.589	2.91936e-42	1.33809e-40
Pdlim1	-1.71129	5.62172	188.602	6.42023e-43	3.01092e-41
Sema4a	-1.71294	6.51075	209.745	1.5617e-47	8.88285e-46
Gvin1	-1.72061	7.15281	204.467	2.21347e-46	1.19199e-44
Socs3	-1.72695	7.57799	192.24	1.03133e-43	4.93472e-42
Pfkfb3	-1.7334	5.87073	183.373	8.89358e-42	3.99872e-40
Oas1g	-1.73369	3.93965	164.672	1.07888e-37	4.11863e-36
Cbfa2t3	-1.7354	5.32115	154.849	1.51054e-35	5.29548e-34
Tmem37	-1.73597	7.56394	167.281	2.90497e-38	1.14286e-36
Rs1	-1.75278	5.8456	85.5633	2.24406e-20	3.78365e-19
Tes	-1.76041	5.08875	215.609	8.20683e-49	4.93566e-47
Dleu2	-1.77802	4.32012	135.402	2.69667e-31	7.85862e-30
Ppbp	-1.77892	6.66078	182.734	1.2262e-41	5.47846e-40
Txnip	-1.77929	4.58982	183.515	8.27731e-42	3.73349e-40
Glipr2	-1.77959	4.65525	207.088	5.93273e-47	3.29511e-45
Akna	-1.78244	8.56687	131.865	1.60165e-30	4.50082e-29
Hdac7	-1.79201	8.88666	160.591	8.40294e-37	3.06729e-35
Mgat4a	-1.79511	5.76436	178.733	9.16509e-41	3.994e-39
Sva	-1.79749	3.19866	115.825	5.19108e-27	1.24402e-25
Pnma2	-1.8006	3.01105	33.0615	8.92874e-09	6.2696e-08
Isg15	-1.80779	8.71073	240.715	2.74648e-54	1.94492e-52
Helz2	-1.81045	6.30393	193.192	6.39203e-44	3.10035e-42
Dck	-1.81324	7.17814	164.551	1.14639e-37	4.35291e-36
Ermn	-1.82648	5.2874	97.715	4.83139e-23	9.38641e-22
Cabp5	-1.83069	4.6916	84.3068	4.23649e-20	7.01771e-19
Nedd9	-1.83393	4.44123	114.257	1.14459e-26	2.67948e-25
Osbpl5	-1.8352	4.84762	235.315	4.1341e-53	2.87016e-51
Vegfa	-1.83873	4.31627	231.421	2.92038e-52	1.98853e-50
4833415N18Rik	-1.84484	6.26548	86.5246	1.38011e-20	2.34934e-19
Csrnp1	-1.84847	6.23358	197.457	7.49709e-45	3.79219e-43
Thbs1	-1.84875	8.60567	223.346	1.68526e-50	1.09487e-48
Ecm1	-1.85599	8.04767	205.707	1.18691e-46	6.49041e-45
Npcd	-1.87824	8.11005	124.253	7.41754e-29	1.95997e-27
Zbtb18	-1.8811	5.58639	194.256	3.7452e-44	1.82908e-42
Ifit3	-1.89852	5.26024	211.08	7.98324e-48	4.61497e-46
Itgb7	-1.93433	6.12436	197.541	7.18532e-45	3.66064e-43
Pacs1	-1.9525	3.07448	66.9941	2.72318e-16	3.64541e-15
BC147527	-1.95525	5.11333	197.457	7.49512e-45	3.79219e-43
Tmbim4	-1.95603	4.22525	140.291	2.29932e-32	7.00329e-31
Nfil3	-1.96383	6.68633	216.653	4.85808e-49	2.953e-47
Pla2g7	-1.96418	7.38619	209.84	1.48828e-47	8.49942e-46
Zfp133-ps	-1.98014	8.64655	168.134	1.89116e-38	7.52375e-37
Yipf2	-1.983	6.74373	210.505	1.06564e-47	6.11036e-46
Phf11d	-1.99611	5.03662	258.104	4.44443e-58	3.53632e-56
Ralgps2	-1.99794	5.10186	125.293	4.3916e-29	1.17577e-27
Abca17	-2.00878	5.463	159.082	1.79536e-36	6.45373e-35
Ifit2	-2.00891	5.26532	253.398	4.71671e-57	3.59154e-55
Apoe	-2.01472	9.72893	241.917	1.50205e-54	1.06902e-52
Lzts3	-2.01928	6.00954	120.966	3.88752e-28	9.90269e-27
Trib3	-2.02167	5.20668	184.333	5.48855e-42	2.49149e-40
Elavl4	-2.02783	8.30435	162.684	2.93249e-37	1.0901e-35
Rara	-2.04316	4.69025	179.177	7.3292e-41	3.22371e-39
Akap7	-2.04797	4.65529	248.868	4.58432e-56	3.39936e-54
Tspan5	-2.0527	4.17746	282.1	2.61802e-63	2.45556e-61
Ccl25	-2.05315	4.71613	168.989	1.23012e-38	4.94949e-37
C1ra	-2.05443	4.60129	261.32	8.84879e-59	7.24424e-57
Mgl2	-2.05462	8.85251	304.271	3.86548e-68	4.24394e-66
Olfr187	-2.06129	4.50053	148.007	4.72809e-34	1.57934e-32
LOC102642410	-2.06544	4.98027	243.925	5.48271e-55	3.9218e-53
Armcx3	-2.0669	9.09891	220.491	7.06712e-50	4.42883e-48
Pcbp3	-2.0701	3.42423	175.468	4.73068e-40	2.03032e-38
Hace1	-2.07752	3.2378	72.9419	1.33525e-17	1.94559e-16
Pdgfa	-2.08612	3.96672	271.241	6.08832e-61	5.3893e-59
Casz1	-2.09581	3.813	258.336	3.95586e-58	3.18334e-56
Tgtp2	-2.0986	6.13814	316.365	8.9666e-71	1.07622e-68
Prr5l	-2.10327	4.88569	206.167	9.42017e-47	5.21164e-45
Gng11	-2.12681	6.38073	193.12	6.62773e-44	3.20371e-42
Gbp3	-2.13007	5.57222	318.349	3.3154e-71	4.04793e-69
Gm9706	-2.14079	5.96117	261.076	9.99771e-59	8.13779e-57
Serpina3g	-2.15045	3.1482	228.281	1.41336e-51	9.26731e-50
Ass1	-2.15098	5.04454	232.818	1.44793e-52	9.95489e-51
Prrt1	-2.15422	3.0396	166.598	4.09462e-38	1.60199e-36
Oasl1	-2.16605	8.46023	218.164	2.27445e-49	1.40668e-47
C2	-2.17335	3.46855	244.864	3.42142e-55	2.47233e-53
Mettl17	-2.17466	3.59378	183.141	9.99317e-42	4.4789e-40
Fpr2	-2.18687	5.41898	225.73	5.08946e-51	3.32175e-49
9430020K01Rik	-2.20879	3.68031	286.993	2.24756e-64	2.18029e-62
Sp6	-2.21812	3.82353	132.048	1.4602e-30	4.11967e-29
Abtb2	-2.22671	3.63762	217.227	3.6405e-49	2.23205e-47
Hnrnpr	-2.22896	3.72643	204.692	1.97697e-46	1.07279e-44
Phf11c	-2.22898	4.33337	304.555	3.35303e-68	3.71007e-66
Trp53i11	-2.24844	7.18336	168.834	1.32996e-38	5.33604e-37
Tlr2	-2.25156	6.01786	370.268	1.63612e-82	2.63322e-80
Usp18	-2.25369	6.57989	266.967	5.19922e-60	4.40938e-58
Ak4	-2.25404	3.46966	271.957	4.24914e-61	3.78494e-59
Mlxipl	-2.26069	5.20041	171.956	2.76615e-39	1.13887e-37
Mx2	-2.26692	3.58587	122.613	1.6944e-28	4.38717e-27
Cd300lf	-2.27516	6.24165	298.872	5.80029e-67	6.13056e-65
Plaur	-2.27564	6.9803	279.525	9.53188e-63	8.82353e-61
Pilrb1	-2.29145	5.18842	266.309	7.23335e-60	6.09797e-58
Klk1b21	-2.29155	6.07865	270.937	7.09206e-61	6.23881e-59
Cox6a2	-2.29514	3.79305	335.985	4.77935e-75	6.44666e-73
Arrdc4	-2.31197	4.60396	303.159	6.75271e-68	7.35681e-66
Apol9a	-2.32186	3.5488	258.246	4.13959e-58	3.31237e-56
Cxcl16	-2.32916	3.89987	305.299	2.3082e-68	2.5741e-66
Arg2	-2.33732	4.4521	223.244	1.77306e-50	1.14666e-48
Ankrd66	-2.34075	4.82702	120.618	4.63203e-28	1.1778e-26
Bhlhe40	-2.36462	4.31567	261.947	6.45733e-59	5.31716e-57
Btg1	-2.36839	9.02287	284.108	9.55977e-64	9.02634e-62
Klk1b3	-2.38256	4.21925	319.762	1.63202e-71	2.00994e-69
Osm	-2.38339	7.97181	284.492	7.8832e-64	7.49327e-62
Pdgfc	-2.38779	5.74821	302.697	8.51523e-68	9.2062e-66
Klk1b8	-2.38865	6.93918	296.089	2.34375e-66	2.40541e-64
Klf4	-2.39907	6.71893	390.45	6.60708e-87	1.19969e-84
Scarf2	-2.41081	3.22659	268.581	2.31321e-60	1.99768e-58
Egln3	-2.41822	3.45445	335.353	6.56135e-75	8.76683e-73
D2Bwg0886e	-2.41843	6.15709	209.441	1.81883e-47	1.0304e-45
Taf2	-2.42835	4.16934	135.11	3.12421e-31	9.06725e-30
Bst1	-2.43124	8.04635	430.125	1.52615e-95	3.48626e-93
Gbp11	-2.44069	4.91182	48.7488	2.90935e-12	2.88349e-11
Il18bp	-2.44946	4.68401	290.844	3.25517e-65	3.20159e-63
Ddit3	-2.45645	4.27463	389.35	1.14651e-86	2.05545e-84
Isg20	-2.46143	5.49424	44.6449	2.36207e-11	2.15e-10
Nlrp1a	-2.46437	8.49127	416.026	1.7881e-92	3.72424e-90
Lsr	-2.46999	4.74302	195.756	1.7624e-44	8.78905e-43
Gadd45g	-2.48143	6.88683	430.054	1.58194e-95	3.55635e-93
Dio2	-2.5234	3.59678	371.262	9.93935e-83	1.61806e-80
Trf	-2.54454	7.92747	329.026	1.56621e-73	1.94581e-71
Scarf1	-2.55177	3.05415	312.438	6.42863e-70	7.40233e-68
Traf1	-2.58349	4.05601	404.815	4.92896e-90	9.30785e-88
Npr3	-2.59263	5.99913	257.746	5.31872e-58	4.20833e-56
Hilpda	-2.60529	7.24468	499.701	1.1042e-110	3.12776e-108
Gbp5	-2.61251	3.64254	267.211	4.60043e-60	3.92505e-58
Olfr1410	-2.61565	3.49471	203.073	4.46023e-46	2.39281e-44
Spint1	-2.62037	4.04467	165.981	5.58583e-38	2.17341e-36
Ddit4	-2.6262	6.10182	294.559	5.04839e-66	5.14391e-64
Nuak1	-2.62711	4.44028	346.259	2.76572e-77	3.87831e-75
AW112010	-2.6348	5.80604	460.334	4.06562e-102	1.02824e-99
Nabp1	-2.64677	4.09336	405.572	3.37288e-90	6.45541e-88
Rdh1	-2.67199	6.00663	232.345	1.83605e-52	1.25623e-50
2610319H10Rik	-2.67227	3.96856	284.689	7.14083e-64	6.83349e-62
H2-Oa	-2.69335	3.35047	255.579	1.5781e-57	1.22135e-55
Gm4951	-2.7086	4.29022	367.968	5.18388e-82	8.1577e-80
Ppp2r2a	-2.71407	4.17005	149.587	2.13419e-34	7.26601e-33
Pde4b	-2.71494	3.2665	312.805	5.34806e-70	6.25988e-68
Btg1-ps2	-2.73438	4.12745	413.043	7.9766e-92	1.61389e-89
Ghrhr	-2.74066	6.49286	253.749	3.95501e-57	3.02782e-55
Spata13	-2.74295	3.31475	155.63	1.01996e-35	3.60243e-34
Spint2	-2.76948	3.00012	230.676	4.24632e-52	2.86384e-50
Irf7	-2.77353	6.65929	350.037	4.16022e-78	6.13762e-76
Sgk1	-2.77523	7.01155	403.687	8.6754e-90	1.61671e-87
Pkdcc	-2.79247	6.59635	37.3722	9.76028e-10	7.63729e-09
Exoc3l	-2.79756	3.46082	222.614	2.43363e-50	1.55259e-48
Tyro3	-2.79776	4.45388	419.688	2.85265e-93	6.03016e-91
B930078G14Rik	-2.8107	6.73988	292.155	1.68636e-65	1.69389e-63
8430426J06Rik	-2.87117	3.34048	205.817	1.12315e-46	6.16558e-45
Fam43a	-2.87242	3.78236	471.447	1.55204e-104	4.14747e-102
Adamts20	-2.87292	3.95547	265.719	9.7242e-60	8.1014e-58
4933439G19Rik	-2.87741	3.27713	195.191	2.34046e-44	1.15498e-42
Ttll4	-2.91757	3.38058	164.228	1.34885e-37	5.10797e-36
Mx1	-2.91776	4.39672	297.218	1.32997e-66	1.38503e-64
Mcemp1	-2.92094	3.91628	221.93	3.43087e-50	2.16926e-48
Ptger4	-2.94236	6.20118	387.53	2.85537e-86	4.99267e-84
Ramp3	-2.97778	6.49271	380.301	1.07024e-84	1.78327e-82
Lpcat2	-2.98403	3.00931	348.712	8.08256e-78	1.18014e-75
Cyp4x1	-3.02641	3.9404	279.077	1.19354e-62	1.09767e-60
Rps24	-3.04071	8.5093	602.723	4.28027e-133	1.78298e-130
Cd74	-3.07659	7.63988	396.083	3.92261e-88	7.21505e-86
C3	-3.15007	6.80853	586.402	1.5188e-129	5.66071e-127
Ccl5	-3.21882	5.45149	208.856	2.44017e-47	1.37143e-45
Ccnd2	-3.23169	5.6104	589.062	4.00879e-130	1.5345e-127
Pyhin1	-3.28409	5.7928	674.454	1.07397e-148	5.43238e-146
H2-Ab1	-3.42021	8.27302	679.533	8.44296e-150	4.4288e-147
Tmcc3	-3.43841	4.99935	554.083	1.62851e-122	5.49158e-120
Tnfrsf18	-3.44789	3.38855	308.428	4.80563e-69	5.44497e-67
Gpc1	-3.44814	4.04922	547.723	3.93791e-121	1.29704e-118
Cd274	-3.47356	7.26628	766.35	1.11768e-168	7.91486e-166
Il4i1	-3.49122	4.71277	353.745	6.48138e-79	9.76551e-77
Il1r2	-3.51253	5.52081	599.721	1.92522e-132	7.79053e-130
H2-Q5	-3.52273	7.61291	708.094	5.19444e-156	2.82957e-153
Iigp1	-3.55902	4.87955	614.714	1.05534e-135	4.52935e-133
Gbp4	-3.69302	4.58416	666.074	7.13374e-147	3.48397e-144
Axl	-3.78259	7.73992	804.778	4.93526e-177	4.65987e-174
Socs1	-3.99321	5.19814	930.578	2.2109e-204	2.60942e-201
Mgll	-4.09725	3.7312	781.968	4.49396e-172	3.536e-169
Fn1	-4.21173	8.69138	755.773	2.22891e-166	1.43491e-163
Apol9b	-4.26157	3.18415	572.01	2.05155e-126	7.45027e-124
Tnfsf8	-4.3579	3.17322	782.491	3.45821e-172	2.88109e-169
Gm4610	-4.45714	3.44596	764.62	2.65847e-168	1.79295e-165
AA467197	-4.48454	5.58303	1024.06	1.05901e-224	1.49988e-221
Asgr2	-4.67452	4.03161	794.072	1.04946e-174	9.28969e-172
Cish	-4.75658	5.02874	1099.37	4.52034e-241	9.14593e-238
Rgcc	-4.93443	4.43162	257.297	6.66404e-58	5.21452e-56
Pmepa1	-5.1167	3.43869	778.061	3.17783e-171	2.36882e-168
Ly6c1	-5.2354	7.25991	1187.04	4.00499e-260	1.41807e-256
Socs2	-5.3745	5.02764	896.843	4.76561e-197	5.19195e-194
Ly6a	-5.71442	9.11651	1191.13	5.1656e-261	2.43868e-257
Ccr7	-5.88672	5.97747	1141.37	3.37223e-250	9.55219e-247
Sphk1	-6.04839	4.73758	1133.09	2.11971e-248	5.00357e-245
9030619P08Rik	-6.11285	6.6707	1512.6	0	0
Mmp13	-7.1368	8.03642	1748.24	0	0
Ly6f	-7.84573	3.2164	1042.89	8.53167e-229	1.3426e-225

## Sheet: Suppl.Table 3_scRNACluster-m-MF
gene	p_val	avg_logFC	pct.1	pct.2	p_val_adj	cluster
Pf4	0	1.20761	0.999	0.949	0	0
Egr1	0	1.0173	0.908	0.435	0	0
Clec4n	0	0.874578	0.868	0.565	0	0
Id3	0	0.849468	0.526	0.132	0	0
Ier3	0	0.758565	0.895	0.68	0	0
Slc40a1	0	0.739353	0.82	0.485	0	0
Ier2	0	0.739161	0.941	0.644	0	0
Fcgrt	0	0.709152	0.968	0.856	0	0
Fos	0	0.700334	0.989	0.918	0	0
Cfp	0	0.694484	0.999	0.967	0	0
Gas6	0	0.673651	0.997	0.924	0	0
Igfbp4	0	0.666443	0.898	0.602	0	0
Wfdc17	0	0.653838	1	0.997	0	0
Nr4a1	0	0.643937	0.509	0.125	0	0
Dab2	0	0.629427	0.991	0.884	0	0
C1qc	0	0.629017	0.969	0.903	0	0
Pmp22	0	0.628261	0.997	0.927	0	0
Gpx3	0	0.578518	0.741	0.417	0	0
Ly86	0	0.578356	0.851	0.778	0	0
Fosb	0	0.562512	0.501	0.178	0	0
Cdkn1a	0	0.560527	0.95	0.87	0	0
Btg2	0	0.549898	0.833	0.642	0	0
Stab1	0	0.548975	0.846	0.755	0	0
Zfp36	0	0.547856	0.983	0.905	0	0
Fcrls	0	0.547162	0.485	0.191	0	0
Cd28	0	0.540875	0.632	0.268	0	0
Cd14	0	0.536922	0.991	0.884	0	0
Mrc1	0	0.530996	0.988	0.936	0	0
Plxdc2	0	0.526257	0.633	0.32	0	0
Csf1r	0	0.518151	0.998	0.975	0	0
Nxpe5	0	0.513581	0.892	0.743	0	0
Mef2c	0	0.513134	0.899	0.71	0	0
Kctd12	0	0.499058	0.897	0.69	0	0
Maf	0	0.498339	0.996	0.936	0	0
Ifitm2	0	0.488949	1	1	0	0
Junb	0	0.488654	0.991	0.945	0	0
Cd83	0	0.488048	0.602	0.294	0	0
Ccr1	0	0.478094	0.88	0.626	0	0
Cd81	0	0.476132	0.571	0.279	0	0
Gpnmb	0	0.471397	0.998	0.954	0	0
Marcksl1	0	0.451564	0.512	0.227	0	0
Selenop	0	0.45089	1	0.994	0	0
Ehd4	0	0.443499	0.998	0.974	0	0
Ctsc	0	0.440054	0.952	0.837	0	0
St3gal5	0	0.436951	0.521	0.227	0	0
Cadm1	0	0.434864	0.912	0.849	0	0
Gas7	0	0.430848	0.854	0.663	0	0
P2ry6	0	0.419972	0.927	0.809	0	0
Tcn2	0	0.417198	0.892	0.747	0	0
Ptgs1	0	0.408503	0.732	0.504	0	0
Rnasel	0	0.400729	0.788	0.603	0	0
0610012G03Rik	0	0.399833	0.996	0.974	0	0
Prdx4	0	0.395658	0.96	0.859	0	0
Rcbtb2	0	0.388819	0.982	0.94	0	0
Eid1	0	0.388323	0.876	0.718	0	0
H2afj	0	0.385016	0.993	0.95	0	0
Wwp1	0	0.383725	0.98	0.894	0	0
Lyz2	0	0.38224	1	1	0	0
Smagp	0	0.380242	0.716	0.478	0	0
Egr3	0	0.371364	0.251	0.06	0	0
Nrros	0	0.368626	0.973	0.908	0	0
Ptpn18	0	0.3682	0.998	0.968	0	0
Pid1	0	0.36508	0.903	0.779	0	0
Tm2d2	0	0.360855	0.957	0.895	0	0
Nrp1	0	0.359727	0.867	0.744	0	0
Rassf4	0	0.351329	0.908	0.797	0	0
Fcgr3	0	0.33595	1	0.996	0	0
Ap2s1	0	0.335011	1	0.998	0	0
Fuca1	0	0.334355	0.997	0.984	0	0
Selenow	0	0.332727	0.962	0.912	0	0
Comt	0	0.330956	0.983	0.941	0	0
Clta	0	0.32124	1	1	0	0
Lmo2	0	0.315619	0.934	0.859	0	0
Adrb2	0	0.31313	0.39	0.162	0	0
Trem2	0	0.309218	1	0.997	0	0
Arpc3	0	0.308461	1	1	0	0
Cd86	0	0.306575	0.397	0.16	0	0
Tbxas1	0	0.304929	0.93	0.858	0	0
Hsp90b1	0	0.284542	1	0.999	0	0
Tmsb4x	0	0.284273	1	1	0	0
Serpinb6a	0	0.271738	0.999	0.995	0	0
Laptm5	0	0.270861	1	0.998	0	0
Erp29	0	0.270114	1	0.997	0	0
Rgs10	0	0.266332	0.996	0.983	0	0
Grn	0	0.263742	1	0.999	0	0
Aldh2	0	0.253952	1	0.998	0	0
Rps11	0	0.251039	1	1	0	0
Cd164	4.56e-297	0.346721	0.724	0.543	7.23e-293	0
Nrcam	9.28e-296	0.337696	0.75	0.573	1.47e-291	0
Picalm	1.05e-295	0.27108	0.983	0.934	1.67e-291	0
Ehd1	1.32e-295	0.360241	0.708	0.497	2.09e-291	0
Osm	2.06e-295	0.390413	0.526	0.286	3.26e-291	0
Lpar6	3.32e-295	0.34536	0.769	0.601	5.26e-291	0
Fcna	1.46e-293	0.25816	0.308	0.108	2.32e-289	0
Evi2a	1.52e-290	0.279836	0.953	0.895	2.41e-286	0
Cfh	2.22e-281	0.377014	0.837	0.703	3.51e-277	0
Ergic3	5.02e-277	0.255838	0.961	0.93	7.96e-273	0
C5ar1	3.26e-274	0.334189	0.824	0.681	5.17e-270	0
Exoc3	9.57e-274	0.28353	0.868	0.786	1.52e-269	0
Adgre1	6.03e-267	0.255273	0.99	0.973	9.56e-263	0
Dusp5	3.7e-262	0.351647	0.38	0.172	5.86e-258	0
C1qa	5.99e-259	0.602596	0.875	0.709	9.5e-255	0
Ednrb	5.87e-251	0.542032	0.776	0.668	9.3e-247	0
Snx6	1.24e-245	0.269548	0.882	0.814	1.97e-241	0
Ccl4	2.84e-245	0.571617	0.859	0.733	4.51e-241	0
Glb1	2.28e-244	0.26701	0.851	0.77	3.62e-240	0
Tmem147	6.32e-237	0.254102	0.83	0.73	1e-232	0
Klf2	3.12e-236	0.435832	0.675	0.502	4.95e-232	0
Fh1	4.15e-235	0.338775	0.699	0.546	6.59e-231	0
Bmp2	4.02e-233	0.312383	0.326	0.144	6.37e-229	0
Fam213b	2.18e-231	0.286622	0.824	0.734	3.45e-227	0
Sash1	4.74e-230	0.252625	0.942	0.872	7.52e-226	0
Slc9a9	2.81e-226	0.286264	0.639	0.44	4.46e-222	0
Atp6v0a1	3.19e-223	0.250148	0.915	0.82	5.06e-219	0
Ccl9	5.14e-217	0.321948	0.919	0.823	8.15e-213	0
Zfp36l1	4.18e-212	0.301792	0.936	0.843	6.62e-208	0
Itsn1	3.86e-209	0.262532	0.848	0.766	6.12e-205	0
Hlx	5.12e-200	0.278646	0.551	0.365	8.11e-196	0
C1qb	2.65e-196	0.542855	0.901	0.787	4.2e-192	0
Pdlim4	7.57e-196	0.271365	0.713	0.575	1.2e-191	0
Rhoh	1.13e-194	0.263878	0.565	0.375	1.79e-190	0
Mxd4	1.72e-190	0.268275	0.696	0.551	2.72e-186	0
Rnase4	1.3e-187	0.269756	0.506	0.316	2.05e-183	0
Ccl2	8.05e-180	0.250218	0.684	0.52	1.28e-175	0
Il4ra	7.59e-177	0.343418	0.731	0.623	1.2e-172	0
Fabp3	3.81e-173	0.281939	0.462	0.281	6.05e-169	0
Tiparp	1.13e-172	0.306778	0.588	0.424	1.8e-168	0
Ccl3	1.01e-170	0.506455	0.733	0.64	1.61e-166	0
Bcl2a1b	2.39e-162	0.279545	0.923	0.86	3.79e-158	0
Dok2	1.05e-158	0.259191	0.572	0.408	1.67e-154	0
Eva1b	1.05e-152	0.257487	0.549	0.389	1.66e-148	0
Egr2	9.8e-149	0.2697	0.345	0.191	1.55e-144	0
Lyzl4	1.58e-141	0.264123	0.274	0.134	2.5e-137	0
Cd38	2.44e-138	0.257621	0.553	0.402	3.87e-134	0
Ccnd1	5.35e-125	0.318241	0.554	0.41	8.48e-121	0
Apoe	0	1.01953	1	0.989	0	1
Fabp4	0	0.795499	0.94	0.762	0	1
Fn1	0	0.748914	0.408	0.148	0	1
Ccl8	0	0.679626	0.93	0.729	0	1
Gngt2	0	0.672344	0.982	0.787	0	1
Atp6v0d2	0	0.656314	0.958	0.711	0	1
Ctsl	0	0.604397	1	1	0	1
F7	0	0.574545	0.43	0.166	0	1
Gng11	0	0.568164	0.833	0.547	0	1
F10	0	0.542141	0.556	0.192	0	1
Pla2g7	0	0.542122	0.989	0.788	0	1
Psap	0	0.534382	1	1	0	1
Il7r	0	0.528666	0.923	0.739	0	1
Plin2	0	0.520994	1	0.997	0	1
Cd274	0	0.5046	0.819	0.548	0	1
Fabp5	0	0.5032	1	0.999	0	1
Ctsh	0	0.493955	0.979	0.756	0	1
Mmp14	0	0.480465	0.49	0.143	0	1
Cxcl16	0	0.4323	0.968	0.859	0	1
Irf7	0	0.42619	0.957	0.775	0	1
Anpep	0	0.422546	0.987	0.939	0	1
Ninj1	0	0.412104	0.999	0.972	0	1
Ctnnb1	0	0.411209	0.992	0.964	0	1
H2-D1	0	0.405382	1	1	0	1
Hpse	0	0.405198	0.953	0.826	0	1
Ctss	0	0.405145	1	0.998	0	1
Cd22	0	0.390779	0.464	0.175	0	1
Gns	0	0.368414	0.993	0.969	0	1
Lipa	0	0.353451	1	0.997	0	1
H2-T23	0	0.344119	0.995	0.954	0	1
Pld3	0	0.333248	1	0.995	0	1
Ctsd	0	0.273674	1	1	0	1
Acp5	5.53e-304	0.452712	0.499	0.225	8.77e-300	1
Mgll	6.23e-301	0.530317	0.357	0.12	9.88e-297	1
Slc11a1	1.28e-297	0.385799	0.923	0.746	2.03e-293	1
Rnf149	3.36e-287	0.372416	0.991	0.958	5.33e-283	1
Fam129b	5.43e-277	0.436984	0.845	0.662	8.61e-273	1
Rin3	6.98e-277	0.369166	0.577	0.308	1.11e-272	1
Fth1	3.08e-276	0.344208	1	1	4.88e-272	1
Ptafr	2.14e-273	0.388925	0.895	0.705	3.4e-269	1
Mafb	1.4e-269	0.384922	0.987	0.946	2.22e-265	1
Daglb	1.91e-269	0.382125	0.793	0.585	3.03e-265	1
Fam20c	1.67e-267	0.348385	0.997	0.986	2.64e-263	1
Lhfpl2	3.44e-263	0.458576	0.749	0.544	5.45e-259	1
Plek	5.85e-260	0.391919	0.988	0.971	9.27e-256	1
Tnfrsf1b	5.86e-259	0.358199	0.869	0.694	9.29e-255	1
Sirpa	1.65e-252	0.288467	0.998	0.992	2.61e-248	1
Soat1	1.74e-250	0.276652	0.998	0.982	2.76e-246	1
Ly6e	2.63e-250	0.277271	0.999	0.989	4.17e-246	1
Ccr5	9.69e-243	0.338458	0.957	0.764	1.54e-238	1
Tnfrsf21	1.84e-234	0.399232	0.59	0.355	2.91e-230	1
Ly9	2.59e-229	0.335875	0.846	0.666	4.11e-225	1
Pdpn	1.44e-226	0.47216	0.499	0.264	2.29e-222	1
Ddit3	6.37e-213	0.324352	0.706	0.493	1.01e-208	1
Lgals3	9.1e-212	0.304227	1	1	1.44e-207	1
Crip1	3.57e-210	0.393216	0.994	0.976	5.65e-206	1
Mfsd12	3.14e-202	0.312735	0.918	0.798	4.98e-198	1
Anxa4	1.21e-201	0.259542	0.996	0.984	1.93e-197	1
Tmem165	1.17e-200	0.393728	0.81	0.67	1.85e-196	1
Antxr2	2.02e-198	0.32289	0.806	0.636	3.2e-194	1
Samd8	2.72e-196	0.349633	0.751	0.572	4.32e-192	1
Abi3	2.96e-195	0.308514	0.531	0.304	4.69e-191	1
Gm2a	3.32e-193	0.285661	0.97	0.924	5.27e-189	1
Rab7	2.8e-189	0.250088	0.995	0.987	4.44e-185	1
Hal	4.26e-187	0.408215	0.473	0.251	6.75e-183	1
Hk3	1.02e-182	0.304007	0.938	0.836	1.62e-178	1
Tmcc3	3.88e-181	0.281667	0.491	0.28	6.16e-177	1
AC149090.1	2.82e-179	0.305739	0.962	0.896	4.47e-175	1
Plxna1	1.81e-178	0.33677	0.705	0.524	2.87e-174	1
Il11ra1	2.13e-177	0.357119	0.674	0.501	3.38e-173	1
Fbxo32	4.83e-175	0.321822	0.298	0.125	7.66e-171	1
Por	4.21e-172	0.294629	0.97	0.903	6.67e-168	1
Iqgap2	4.12e-171	0.254627	0.439	0.234	6.54e-167	1
Myof	6.48e-170	0.307118	0.863	0.726	1.03e-165	1
Cxcr4	1.62e-168	0.329545	0.88	0.742	2.57e-164	1
Slamf7	2.17e-168	0.309133	0.638	0.434	3.44e-164	1
Ddhd1	1.06e-163	0.340012	0.559	0.362	1.69e-159	1
Sdc1	1.5e-162	0.271642	0.271	0.109	2.38e-158	1
Itgax	6.49e-162	0.408544	0.394	0.208	1.03e-157	1
Plpp3	3.93e-155	0.251228	0.336	0.158	6.23e-151	1
Ecm1	7.72e-155	0.314016	0.809	0.653	1.22e-150	1
Gadd45b	1.64e-150	0.307891	0.704	0.516	2.61e-146	1
Csf2ra	2.47e-150	0.281908	0.802	0.652	3.92e-146	1
Hvcn1	8.29e-150	0.28188	0.686	0.508	1.31e-145	1
Evl	3.36e-147	0.296731	0.889	0.789	5.33e-143	1
Tmem65	8.52e-140	0.252413	0.778	0.625	1.35e-135	1
Cebpa	6.26e-135	0.262158	0.752	0.614	9.93e-131	1
Lars2	7.91e-134	0.323852	0.908	0.841	1.25e-129	1
Fcgr2b	3.59e-132	0.277342	0.979	0.906	5.7e-128	1
Ccrl2	8.22e-132	0.279094	0.628	0.447	1.3e-127	1
Pea15a	4.78e-127	0.253269	0.936	0.89	7.58e-123	1
Sgk1	1.11e-124	0.32655	0.538	0.364	1.77e-120	1
Abca1	1.18e-121	0.307157	0.783	0.622	1.87e-117	1
Ahnak2	4.57e-117	0.252035	0.8	0.661	7.24e-113	1
Socs6	1.17e-112	0.253763	0.756	0.628	1.86e-108	1
Mmp12	1.37e-112	0.347847	0.896	0.79	2.17e-108	1
Maoa	8.99e-112	0.324298	0.484	0.316	1.43e-107	1
Atf5	1.59e-99	0.279642	0.655	0.521	2.52e-95	1
Anxa1	1.03e-96	0.271153	0.996	0.99	1.63e-92	1
Rilpl2	4.02e-90	0.259276	0.861	0.77	6.37e-86	1
Arg2	1.06e-89	0.258468	0.63	0.475	1.68e-85	1
Rnf128	1.56e-72	0.264258	0.655	0.551	2.47e-68	1
Gm42418	3.52e-65	0.731871	1	1	5.58e-61	1
Thbs1	4.73e-58	0.306598	0.519	0.397	7.49e-54	1
Tfrc	1.04e-48	0.274148	0.826	0.765	1.64e-44	1
Ly6a	0	1.54223	0.941	0.5	0	2
Ahsa1	0	0.84705	0.914	0.756	0	2
Ms4a7	0	0.810444	0.998	0.983	0	2
Pcp4l1	0	0.776504	0.852	0.506	0	2
Lst1	0	0.658709	0.979	0.909	0	2
Tmem171	0	0.610994	0.613	0.165	0	2
Ms4a4c	0	0.582248	0.479	0.133	0	2
Pld4	0	0.582029	0.945	0.772	0	2
Rapsn	0	0.536386	0.657	0.278	0	2
Ifitm3	0	0.482522	1	1	0	2
Bst2	0	0.472954	1	0.99	0	2
Lgals1	0	0.415121	1	0.999	0	2
Cstb	0	0.408071	1	1	0	2
Fcer1g	0	0.356782	0.999	0.999	0	2
Ppia	0	0.340688	1	1	0	2
Ifi27l2a	2.86e-304	0.816189	0.99	0.988	4.53e-300	2
S100a4	1.86e-300	0.845929	0.626	0.276	2.95e-296	2
Plin21	4.09e-295	0.491179	0.999	0.998	6.48e-291	2
Ly6e1	1.54e-284	0.435473	0.999	0.99	2.44e-280	2
Pgk1	1.79e-278	0.534781	0.985	0.955	2.84e-274	2
Cblb	7.94e-274	0.577408	0.678	0.335	1.26e-269	2
Sh3bgrl3	2.01e-271	0.329343	1	1	3.19e-267	2
Rnh1	3.3e-270	0.455788	0.996	0.985	5.23e-266	2
Mif	1.69e-269	0.457455	0.997	0.99	2.68e-265	2
Lpxn	2.23e-266	0.474624	0.801	0.484	3.53e-262	2
Calm1	1.05e-261	0.308713	1	1	1.67e-257	2
Ms4a6b	1.83e-258	0.532439	0.897	0.649	2.9e-254	2
Rbx1	3.84e-255	0.330366	0.999	0.995	6.08e-251	2
Ifit3	1.77e-253	0.650154	0.487	0.185	2.8e-249	2
Tpi1	9.24e-248	0.431588	0.995	0.972	1.46e-243	2
Capg	1.95e-242	0.357643	1	0.996	3.08e-238	2
Sdc4	2.03e-241	0.473767	0.925	0.78	3.22e-237	2
Oas1a	1.85e-236	0.408438	0.807	0.502	2.93e-232	2
Cfl1	8.75e-234	0.281212	1	1	1.39e-229	2
Clic1	1.77e-231	0.278445	1	1	2.81e-227	2
Irf71	6.01e-229	0.484561	0.959	0.795	9.52e-225	2
Pfn1	5.83e-225	0.296441	1	1	9.25e-221	2
Gsn	5.52e-224	0.416264	0.964	0.881	8.75e-220	2
Anxa5	2.03e-216	0.300735	0.999	0.998	3.21e-212	2
Ms4a6d	5.88e-214	0.359979	0.999	0.995	9.33e-210	2
Vma21	6.09e-214	0.483634	0.82	0.594	9.66e-210	2
Ckb	3.44e-211	0.585896	0.97	0.925	5.46e-207	2
Lat2	2.22e-209	0.455834	0.94	0.861	3.51e-205	2
Ifi44	5.47e-203	0.515992	0.856	0.634	8.67e-199	2
S100a6	1.87e-202	0.541188	0.913	0.853	2.97e-198	2
Pdzk1ip1	1.9e-200	0.394603	0.574	0.277	3.01e-196	2
Atp6v1g1	2.75e-196	0.264588	1	1	4.36e-192	2
Ube2l6	1.29e-194	0.340747	0.594	0.297	2.04e-190	2
Tmem256	1.89e-194	0.279698	0.999	0.996	3e-190	2
Fam50a	1.49e-191	0.418555	0.905	0.774	2.36e-187	2
Psmd8	1.89e-187	0.32642	0.997	0.99	2.99e-183	2
Psmb8	1.01e-186	0.292412	0.998	0.99	1.61e-182	2
Uap1l1	4.82e-183	0.35034	0.973	0.935	7.64e-179	2
Cycs	9.74e-181	0.396813	0.842	0.622	1.54e-176	2
Oasl2	1.71e-180	0.397697	0.832	0.582	2.71e-176	2
Oas3	1.15e-178	0.384135	0.71	0.416	1.83e-174	2
Ldha	3.02e-178	0.314365	0.999	0.997	4.78e-174	2
Ifit1	1.25e-175	0.534626	0.436	0.182	1.98e-171	2
Ms4a6c	8.65e-175	0.377126	0.98	0.935	1.37e-170	2
Xaf1	3.12e-170	0.375117	0.728	0.455	4.95e-166	2
Folr2	4.61e-167	0.653403	0.846	0.719	7.3e-163	2
Rtp4	9.13e-166	0.369739	0.887	0.705	1.45e-161	2
Pdgfa	8.17e-165	0.354067	0.443	0.196	1.29e-160	2
Ptma	3.85e-163	0.252158	1	1	6.11e-159	2
Cdk18	1.03e-162	0.356839	0.719	0.439	1.64e-158	2
Cox5b	8.58e-162	0.259199	0.998	0.993	1.36e-157	2
Taf10	1.88e-161	0.268929	0.994	0.979	2.98e-157	2
Gapdh	1.12e-160	0.269874	1	1	1.77e-156	2
Lilr4b	1.92e-158	0.349969	0.967	0.926	3.04e-154	2
Cd72	2e-157	0.604518	0.862	0.73	3.18e-153	2
Irgm1	2.7e-157	0.354205	0.722	0.446	4.28e-153	2
Atp5g1	3.09e-156	0.284334	0.989	0.961	4.9e-152	2
Coro1a	6.55e-152	0.319182	0.948	0.828	1.04e-147	2
Pkm	1.74e-150	0.280565	1	0.997	2.76e-146	2
Mgst3	1.24e-149	0.348694	0.867	0.674	1.97e-145	2
Lgals31	1.87e-149	0.319598	1	1	2.96e-145	2
Cap1	2.61e-149	0.283379	0.985	0.96	4.14e-145	2
Rasgef1b	7.9e-148	0.335322	0.607	0.336	1.25e-143	2
Basp1	4.17e-147	0.368877	0.983	0.953	6.62e-143	2
Pdxk	9.14e-146	0.349798	0.939	0.863	1.45e-141	2
Chchd10	1.8e-144	0.389189	0.901	0.795	2.86e-140	2
Psma2	8.05e-144	0.277227	0.977	0.938	1.28e-139	2
Cdk14	1.28e-143	0.357618	0.671	0.411	2.03e-139	2
Eif4a1	2.89e-143	0.274753	0.998	0.996	4.59e-139	2
Naa20	1.33e-141	0.319535	0.943	0.862	2.11e-137	2
Por1	2.93e-141	0.335343	0.96	0.912	4.65e-137	2
Tpm1	7.97e-141	0.352671	0.817	0.63	1.26e-136	2
Rap2b	1.07e-139	0.340609	0.935	0.865	1.7e-135	2
Ifi44l	4.57e-137	0.323268	0.656	0.395	7.24e-133	2
Ran	4.69e-137	0.295879	0.96	0.904	7.44e-133	2
Lair1	2.11e-136	0.343881	0.817	0.62	3.35e-132	2
Zbp1	1.81e-135	0.363479	0.664	0.413	2.88e-131	2
Ifi204	2.92e-132	0.37317	0.878	0.718	4.64e-128	2
Hsp90aa1	6.75e-132	0.293861	0.983	0.967	1.07e-127	2
Ppp1r14b	3.83e-131	0.276482	0.983	0.967	6.07e-127	2
Isg15	7.68e-131	0.522562	0.742	0.529	1.22e-126	2
Ccl81	1.07e-129	0.813322	0.879	0.758	1.7e-125	2
Vipas39	2.75e-129	0.31297	0.798	0.598	4.36e-125	2
Vps29	1.29e-126	0.256403	0.984	0.952	2.04e-122	2
Cd180	2.18e-125	0.318042	0.844	0.677	3.45e-121	2
Xylt2	9.86e-124	0.348462	0.78	0.594	1.56e-119	2
Usp18	8.2e-123	0.288996	0.489	0.253	1.3e-118	2
Ap1s1	8.37e-118	0.272583	0.898	0.786	1.33e-113	2
Tmsb10	8.41e-118	0.397052	0.995	0.99	1.33e-113	2
Hspd1	1.8e-115	0.299432	0.934	0.848	2.85e-111	2
Vti1b	7.02e-115	0.258749	0.952	0.894	1.11e-110	2
Fnip2	5.56e-113	0.310417	0.922	0.821	8.82e-109	2
Gmfg	1.13e-112	0.279449	0.884	0.741	1.79e-108	2
Man1a	6.86e-112	0.317565	0.875	0.746	1.09e-107	2
Pnp	1.16e-111	0.324965	0.926	0.87	1.85e-107	2
Aprt	2.08e-111	0.271768	0.995	0.993	3.3e-107	2
Timm17a	4.59e-111	0.263972	0.838	0.656	7.28e-107	2
Phf11b	2.19e-109	0.29111	0.532	0.31	3.48e-105	2
Ocel1	5.15e-109	0.274202	0.856	0.731	8.16e-105	2
Ndufa12	2.93e-108	0.260874	0.96	0.905	4.65e-104	2
Ifit2	5.36e-108	0.582254	0.492	0.272	8.51e-104	2
Ifi35	5.25e-107	0.264126	0.673	0.436	8.32e-103	2
Rbm3	1.28e-105	0.283099	0.898	0.786	2.04e-101	2
Rexo2	9.35e-105	0.250749	0.921	0.839	1.48e-100	2
Hsd17b10	1.24e-104	0.310563	0.789	0.625	1.96e-100	2
Actg1	4.56e-104	0.299221	1	0.999	7.22e-100	2
Rpl22l1	6.8e-104	0.294799	0.962	0.941	1.08e-99	2
Stat1	1.12e-103	0.329996	0.763	0.57	1.78e-99	2
Il2rg	5.05e-103	0.266767	0.654	0.421	8.01e-99	2
Plekho2	3.93e-101	0.268741	0.921	0.84	6.23e-97	2
Limd2	5.1e-101	0.277153	0.809	0.635	8.08e-97	2
Cux1	2.12e-100	0.262083	0.919	0.829	3.36e-96	2
Ifi211	4.29e-99	0.258446	0.624	0.398	6.8e-95	2
Pdia6	1.7e-98	0.266887	0.973	0.952	2.7e-94	2
Adam8	1.01e-97	0.308541	0.966	0.943	1.59e-93	2
Ranbp1	1.6e-97	0.301107	0.847	0.735	2.54e-93	2
Pole4	3.67e-96	0.253497	0.643	0.422	5.82e-92	2
Lgals9	2.16e-95	0.261345	0.919	0.834	3.42e-91	2
Rars	4e-95	0.255073	0.719	0.512	6.34e-91	2
Bin1	1.34e-94	0.265487	0.874	0.759	2.13e-90	2
Osbpl8	5.71e-94	0.253253	0.991	0.981	9.05e-90	2
Gch1	1.53e-92	0.272036	0.706	0.502	2.43e-88	2
Ccl41	2.11e-92	0.565746	0.86	0.771	3.34e-88	2
Kcnn4	1.18e-91	0.283582	0.375	0.191	1.87e-87	2
Ccl12	3.01e-91	0.849883	0.475	0.282	4.77e-87	2
Pltp	1.19e-90	0.309561	0.996	0.976	1.89e-86	2
Psen2	1.86e-90	0.261721	0.9	0.81	2.95e-86	2
Mcm6	2.9e-89	0.304256	0.278	0.123	4.59e-85	2
Ccnd11	1.6e-88	0.368748	0.638	0.444	2.53e-84	2
Oasl1	4.18e-88	0.270253	0.554	0.335	6.62e-84	2
Ccl7	5.72e-87	1.23029	0.598	0.473	9.07e-83	2
Fam111a	3.11e-86	0.298429	0.715	0.532	4.92e-82	2
Dab21	1.13e-84	0.308966	0.967	0.919	1.79e-80	2
Nt5dc2	8.84e-84	0.286006	0.839	0.709	1.4e-79	2
Ddx60	1.41e-80	0.25103	0.562	0.353	2.24e-76	2
Gatm	2.2e-80	0.270472	0.844	0.722	3.49e-76	2
Psmd1	1.67e-78	0.305698	0.914	0.851	2.65e-74	2
Ccl21	2.74e-76	1.04649	0.662	0.572	4.35e-72	2
Snx2	3.69e-76	0.250555	0.915	0.851	5.85e-72	2
Mt2	4.27e-76	0.279594	0.491	0.307	6.76e-72	2
Pcna	3.07e-72	0.318202	0.688	0.528	4.87e-68	2
Gadd45a	7.63e-68	0.396212	0.552	0.376	1.21e-63	2
Rgs1	3.37e-67	0.382815	0.843	0.806	5.34e-63	2
Spp1	1.32e-65	0.356553	0.998	0.998	2.09e-61	2
Rsad2	2.1e-64	0.746104	0.425	0.255	3.33e-60	2
Glrx	2.27e-64	0.267916	0.748	0.612	3.6e-60	2
Slfn5	1.2e-57	0.250844	0.917	0.858	1.91e-53	2
Ifi47	2.31e-57	0.254802	0.543	0.38	3.66e-53	2
Rnf213	1.15e-52	0.253444	0.736	0.599	1.82e-48	2
Plau	1.34e-47	0.33607	0.738	0.658	2.13e-43	2
Il1rn	3.49e-45	0.315654	0.378	0.242	5.53e-41	2
Ccl31	4.05e-38	0.263294	0.749	0.666	6.43e-34	2
Cd141	1.47e-33	0.255973	0.952	0.921	2.33e-29	2
Rgs2	1.54e-29	0.256844	0.909	0.893	2.44e-25	2
Bex1	0	2.66769	0.737	0.129	0	3
Mfge8	0	2.49433	0.863	0.469	0	3
Tceal9	0	1.19901	0.937	0.865	0	3
Fn11	0	1.08289	0.553	0.165	0	3
Maoa1	0	0.99228	0.747	0.31	0	3
Ctsl1	0	0.927108	1	1	0	3
Atp6v0d21	0	0.912392	0.993	0.738	0	3
Mgll1	0	0.91055	0.55	0.129	0	3
Fabp41	0	0.909181	0.964	0.781	0	3
Pdpn1	0	0.86849	0.715	0.27	0	3
Il7r1	0	0.786322	0.968	0.756	0	3
Gng111	0	0.777657	0.915	0.573	0	3
F71	0	0.737764	0.547	0.186	0	3
Acp51	0	0.729641	0.67	0.241	0	3
F101	0	0.709628	0.673	0.224	0	3
Tnfrsf211	0	0.705064	0.77	0.365	0	3
Plin22	0	0.675446	1	0.998	0	3
Gngt21	0	0.67069	0.969	0.812	0	3
Plpp31	0	0.64434	0.574	0.155	0	3
Fabp51	0	0.577655	1	0.999	0	3
Sdc11	0	0.576242	0.458	0.11	0	3
Fth11	0	0.513914	1	1	0	3
Psap1	0	0.50367	1	1	0	3
Mmp141	0	0.471544	0.57	0.177	0	3
H2-D11	0	0.470197	1	1	0	3
Ctss1	0	0.461274	1	0.998	0	3
Slamf8	0	0.430194	0.427	0.108	0	3
Ftl1	0	0.40375	1	1	0	3
Ctsd1	0	0.365489	1	1	0	3
Cd200	0	0.317994	0.321	0.066	0	3
Gpc1	0	0.294023	0.324	0.065	0	3
Creg1	4.85e-295	0.392697	1	0.999	7.7e-291	3
Cd221	1.33e-291	0.415478	0.56	0.2	2.1e-287	3
Plxna11	8.88e-288	0.541713	0.85	0.532	1.41e-283	3
Il11ra11	1.24e-280	0.554461	0.824	0.507	1.96e-276	3
Rnf1491	6.43e-274	0.503101	0.994	0.962	1.02e-269	3
Lgals32	3.78e-273	0.447532	1	1	5.99e-269	3
Npc2	1.33e-271	0.273324	1	1	2.11e-267	3
Gpx1	5.22e-265	0.462345	0.999	1	8.28e-261	3
Fam129b1	5.66e-265	0.549237	0.902	0.678	8.97e-261	3
Lipa1	7.74e-265	0.375579	1	0.997	1.23e-260	3
Fam20c1	2.14e-263	0.442524	0.999	0.987	3.39e-259	3
Lhfpl21	1.73e-261	0.581586	0.85	0.559	2.74e-257	3
Mmp121	2.15e-259	0.878686	0.936	0.799	3.41e-255	3
Anpep1	4.1e-254	0.446608	0.995	0.944	6.5e-250	3
Anxa11	5.71e-251	0.528892	0.998	0.991	9.05e-247	3
Fbxo321	1.29e-250	0.557777	0.419	0.133	2.04e-246	3
Cd2741	7.88e-241	0.524958	0.861	0.576	1.25e-236	3
Myof1	3.28e-237	0.492524	0.915	0.737	5.19e-233	3
Mettl7a1	3.49e-237	0.515883	0.681	0.356	5.54e-233	3
Klra3	8.97e-234	0.360064	0.494	0.183	1.42e-229	3
Gstm1	1.99e-232	0.492871	0.973	0.883	3.16e-228	3
Ctsh1	3.03e-232	0.471709	0.965	0.785	4.81e-228	3
Slamf71	7.84e-230	0.461521	0.778	0.445	1.24e-225	3
Txn1	1.5e-229	0.417373	1	0.999	2.37e-225	3
Itgax1	2.39e-229	0.53351	0.536	0.216	3.79e-225	3
Tst	3.24e-222	0.339873	0.484	0.182	5.14e-218	3
Bnip3l	1.53e-221	0.408708	0.973	0.893	2.43e-217	3
Ldhb	4.47e-219	0.330997	0.498	0.191	7.08e-215	3
Gadd45b1	2.51e-211	0.498249	0.814	0.528	3.99e-207	3
Arg1	2.6e-211	0.919928	0.315	0.087	4.12e-207	3
Soat11	2.32e-209	0.339658	0.997	0.984	3.68e-205	3
Tmem1651	7.3e-209	0.514074	0.868	0.681	1.16e-204	3
Slc11a11	1.91e-204	0.414471	0.946	0.765	3.03e-200	3
Samd81	1.15e-202	0.454964	0.837	0.585	1.83e-198	3
Ddit31	2.58e-201	0.444853	0.792	0.51	4.08e-197	3
Ctnnb11	6.81e-200	0.404624	0.996	0.967	1.08e-195	3
Apoe1	9.34e-195	0.478626	0.996	0.99	1.48e-190	3
Anxa41	2.76e-193	0.324969	0.998	0.985	4.38e-189	3
Rnf1281	1.55e-192	0.49158	0.806	0.548	2.46e-188	3
Hk31	1.13e-190	0.380947	0.973	0.845	1.79e-186	3
Ptafr1	7.19e-190	0.437554	0.903	0.727	1.14e-185	3
Crip11	8.21e-190	0.423794	0.997	0.978	1.3e-185	3
Abcg1	2.47e-189	0.437815	0.701	0.391	3.91e-185	3
Ftl1-ps1	2.43e-183	0.344403	0.99	0.944	3.85e-179	3
Rhov	8.01e-183	0.288861	0.474	0.192	1.27e-178	3
Pld31	1.66e-182	0.294634	1	0.995	2.63e-178	3
Daglb1	6.15e-176	0.413057	0.835	0.606	9.76e-172	3
Ninj11	1.52e-172	0.347573	0.993	0.976	2.42e-168	3
Gm14461	1.19e-169	0.384721	0.676	0.379	1.88e-165	3
Gprc5b	1.44e-167	0.255706	0.305	0.097	2.28e-163	3
Sel1l3	1.47e-163	0.276493	0.418	0.165	2.33e-159	3
Sgk11	1.31e-156	0.495141	0.649	0.374	2.08e-152	3
Cstb1	6.14e-156	0.265812	1	1	9.73e-152	3
Atf51	9e-156	0.468603	0.768	0.525	1.43e-151	3
Csf2ra1	2.87e-154	0.36207	0.86	0.665	4.56e-150	3
Cd300c2	1.9e-153	0.309441	0.997	0.976	3.01e-149	3
Capg1	3.57e-152	0.297364	1	0.996	5.66e-148	3
Por2	4.4e-150	0.348239	0.976	0.911	6.98e-146	3
Pla2g71	4.94e-149	0.372709	0.96	0.816	7.84e-145	3
Tfrc1	3.08e-148	0.562178	0.887	0.766	4.88e-144	3
Gadd45a1	1.93e-145	0.515607	0.633	0.369	3.06e-141	3
Cd200r1	1.89e-144	0.332487	0.937	0.831	3e-140	3
Tceal8	1.38e-142	0.48058	0.702	0.465	2.19e-138	3
Ctsk	1.42e-142	0.255697	0.293	0.1	2.25e-138	3
C77080	5.26e-141	0.334133	0.701	0.424	8.34e-137	3
Cxcl161	4.2e-140	0.377838	0.952	0.874	6.66e-136	3
Mfsd121	5.06e-140	0.335227	0.937	0.811	8.03e-136	3
Ccrl21	2.93e-137	0.360043	0.722	0.46	4.64e-133	3
Msrb1	4.11e-137	0.280104	0.989	0.96	6.51e-133	3
Cd84	2.22e-136	0.252509	0.999	0.992	3.52e-132	3
Rin31	1.31e-133	0.288574	0.616	0.337	2.08e-129	3
Tmem651	1.83e-133	0.334089	0.842	0.637	2.9e-129	3
Hipk2	3.59e-133	0.342394	0.697	0.447	5.69e-129	3
Vim	2.34e-132	0.318152	0.998	0.997	3.71e-128	3
Tnfrsf1b1	9.28e-130	0.327582	0.878	0.715	1.47e-125	3
Plek1	5.13e-128	0.350745	0.99	0.973	8.13e-124	3
Mgst1	1.31e-126	0.272595	0.989	0.909	2.08e-122	3
Slc15a3	5.42e-126	0.311913	0.981	0.917	8.59e-122	3
Knop1	2.02e-125	0.372533	0.873	0.737	3.2e-121	3
Hist1h2bc	2.97e-125	0.389548	0.923	0.792	4.71e-121	3
Gadd45g	5.15e-124	0.382929	0.544	0.292	8.17e-120	3
Pkdcc	5.95e-124	0.303495	0.413	0.191	9.43e-120	3
Hvcn11	1.16e-123	0.336385	0.748	0.523	1.84e-119	3
Esd	2.67e-123	0.33865	0.998	0.996	4.23e-119	3
Gns1	4.21e-123	0.261578	0.994	0.972	6.68e-119	3
Emc1	3.4e-122	0.294941	0.641	0.386	5.39e-118	3
Cipc	1.76e-118	0.276989	0.629	0.364	2.78e-114	3
Ahnak21	4.07e-115	0.356882	0.842	0.674	6.46e-111	3
Hmox1	6.54e-110	0.330124	0.982	0.944	1.04e-105	3
Psen21	9.75e-110	0.283536	0.921	0.808	1.55e-105	3
Wsb2	5.24e-108	0.27288	0.847	0.669	8.3e-104	3
Irf72	1.27e-106	0.2872	0.928	0.8	2.01e-102	3
Rilpl21	4.26e-105	0.376383	0.88	0.779	6.76e-101	3
Ddhd11	1.24e-104	0.295165	0.619	0.38	1.97e-100	3
Hal1	2.27e-104	0.387578	0.505	0.274	3.59e-100	3
Tmem140	4.71e-103	0.340248	0.903	0.79	7.47e-99	3
Slpi	5.06e-103	0.301402	0.434	0.213	8.02e-99	3
Bhlhe41	7.5e-103	0.328709	0.761	0.569	1.19e-98	3
Srxn1	1.19e-101	0.309907	0.671	0.447	1.89e-97	3
Ly91	1.27e-98	0.27664	0.851	0.688	2.02e-94	3
Tbc1d9	9.93e-98	0.262245	0.601	0.372	1.57e-93	3
Galns	1.68e-97	0.257751	0.688	0.457	2.66e-93	3
Flrt2	5.59e-97	0.307661	0.503	0.283	8.86e-93	3
Rhoc	1.3e-96	0.313034	0.91	0.829	2.07e-92	3
Abi31	6.46e-96	0.26901	0.565	0.328	1.02e-91	3
Pik3r5	2.49e-95	0.274323	0.742	0.544	3.94e-91	3
Napsa	1.24e-94	0.272232	0.625	0.391	1.97e-90	3
B4galt5	1.63e-93	0.291849	0.793	0.627	2.59e-89	3
Bex3	7.15e-93	0.346833	0.832	0.735	1.13e-88	3
Ly6a1	1.03e-86	0.267807	0.742	0.524	1.64e-82	3
Gabarapl1	1.24e-86	0.256454	0.757	0.576	1.96e-82	3
Slc6a8	1.51e-84	0.332487	0.73	0.581	2.39e-80	3
Cebpa1	6.81e-83	0.257105	0.792	0.627	1.08e-78	3
Arg21	1.21e-82	0.336036	0.692	0.488	1.92e-78	3
Dhrs9	1.18e-79	0.258266	0.497	0.29	1.87e-75	3
Chd3	9.07e-79	0.260702	0.745	0.576	1.44e-74	3
Cd300lf	5.91e-78	0.332496	0.65	0.47	9.37e-74	3
Antxr21	1.88e-77	0.258744	0.817	0.656	2.98e-73	3
Adam81	2.06e-77	0.257915	0.973	0.943	3.26e-73	3
Mafb1	3.83e-77	0.271974	0.968	0.953	6.07e-73	3
Ccl82	7.35e-77	0.308231	0.883	0.758	1.17e-72	3
Adamtsl5	3.41e-76	0.255801	0.582	0.383	5.41e-72	3
Ecm11	4.37e-75	0.281067	0.815	0.672	6.93e-71	3
Prdx1	1.8e-73	0.293203	1	0.999	2.86e-69	3
Chmp1b	4.17e-73	0.259353	0.708	0.537	6.61e-69	3
Gde1	6.74e-73	0.25073	0.726	0.568	1.07e-68	3
Mmp19	3.84e-72	0.266691	0.508	0.318	6.09e-68	3
Evl1	9.08e-70	0.252947	0.893	0.801	1.44e-65	3
Nabp1	1.61e-66	0.250763	0.515	0.329	2.55e-62	3
Bcap31	9.81e-62	0.257128	0.958	0.935	1.56e-57	3
Rgl1	8.69e-61	0.297374	0.787	0.68	1.38e-56	3
Npy	8.75e-57	0.723421	0.576	0.435	1.39e-52	3
Cd300ld	9.2e-55	0.250539	0.725	0.587	1.46e-50	3
Map4k4	3.23e-46	0.284129	0.818	0.749	5.13e-42	3
Il1rn1	1.14e-42	0.374061	0.375	0.243	1.81e-38	3
Thbs11	8.98e-20	0.281298	0.511	0.413	1.42e-15	3
Hist1h1b	0	2.39094	0.715	0.073	0	4
Mki67	0	2.26393	0.952	0.091	0	4
Ube2c	0	2.23748	0.863	0.044	0	4
Stmn1	0	2.2143	0.998	0.453	0	4
Birc5	0	2.20508	0.944	0.063	0	4
Top2a	0	2.19911	0.887	0.092	0	4
Cenpf	0	2.04891	0.837	0.018	0	4
Hist1h2ae	0	1.9531	0.684	0.194	0	4
Pclaf	0	1.87596	0.945	0.042	0	4
Prc1	0	1.79677	0.809	0.024	0	4
Cks1b	0	1.72781	0.964	0.119	0	4
Pttg1	0	1.71192	0.828	0.088	0	4
Cdk1	0	1.63186	0.902	0.173	0	4
Cdca8	0	1.62331	0.93	0.144	0	4
Tubb5	0	1.61414	0.998	0.964	0	4
Hmmr	0	1.5779	0.841	0.014	0	4
Cenpe	0	1.56578	0.817	0.057	0	4
Tpx2	0	1.5624	0.873	0.062	0	4
Ube2s	0	1.55431	0.999	0.891	0	4
Smc2	0	1.5315	0.908	0.179	0	4
Hmgb2	0	1.52396	0.969	0.704	0	4
H2afz	0	1.51108	1	0.99	0	4
Tubb4b	0	1.46449	0.971	0.735	0	4
Ccnb2	0	1.46331	0.802	0.032	0	4
Cdca3	0	1.45907	0.878	0.048	0	4
Smc4	0	1.41958	0.944	0.48	0	4
H2afx	0	1.41206	0.834	0.22	0	4
Cks2	0	1.39049	0.804	0.139	0	4
Hist1h1e	0	1.38882	0.858	0.411	0	4
Tmpo	0	1.37281	0.917	0.354	0	4
Cenpa	0	1.36656	0.902	0.567	0	4
Nusap1	0	1.35032	0.709	0.01	0	4
Tuba1b	0	1.31311	0.992	0.913	0	4
Tk1	0	1.31099	0.781	0.032	0	4
Racgap1	0	1.25976	0.857	0.054	0	4
Incenp	0	1.25057	0.834	0.272	0	4
Ccna2	0	1.2397	0.796	0.011	0	4
Selenoh	0	1.23545	0.941	0.344	0	4
H2afv	0	1.23136	0.99	0.741	0	4
Knstrn	0	1.23114	0.831	0.043	0	4
Ccnb1	0	1.21263	0.751	0.028	0	4
Kif23	0	1.20704	0.75	0.04	0	4
Cdc20	0	1.19236	0.669	0.021	0	4
Kif20b	0	1.19004	0.745	0.044	0	4
Lsm2	0	1.17729	0.927	0.315	0	4
Ran1	0	1.15747	0.999	0.906	0	4
Rrm1	0	1.12914	0.855	0.182	0	4
Tagln2	0	1.128	0.998	0.951	0	4
Spc25	0	1.1255	0.78	0.065	0	4
Rrm2	0	1.0994	0.598	0.022	0	4
Spc24	0	1.09903	0.821	0.031	0	4
Lmnb1	0	1.09674	0.791	0.079	0	4
Pbk	0	1.08566	0.675	0.007	0	4
Spdl1	0	1.07571	0.769	0.155	0	4
Plk1	0	1.06181	0.681	0.011	0	4
Ezh2	0	1.05065	0.809	0.192	0	4
Cdkn2c	0	1.03628	0.803	0.229	0	4
Tacc3	0	1.0345	0.837	0.075	0	4
Anln	0	1.03075	0.701	0.013	0	4
Nucks1	0	1.02357	0.986	0.736	0	4
Asf1b	0	1.01572	0.784	0.047	0	4
Cdkn3	0	1.0122	0.69	0.028	0	4
Clspn	0	1.01072	0.604	0.043	0	4
Tyms	0	1.0069	0.741	0.083	0	4
Anp32b	0	0.993533	1	0.966	0	4
Ndc80	0	0.99314	0.721	0.016	0	4
Gmnn	0	0.97423	0.846	0.394	0	4
Kif11	0	0.966296	0.64	0.019	0	4
Ckap2l	0	0.958107	0.701	0.01	0	4
Arl6ip1	0	0.95494	0.997	0.992	0	4
Rangap1	0	0.949243	0.878	0.283	0	4
Knl1	0	0.944877	0.662	0.013	0	4
Pimreg	0	0.938165	0.665	0.005	0	4
Hmgb1	0	0.930499	0.999	0.956	0	4
Dlgap5	0	0.928117	0.713	0.034	0	4
Sae1	0	0.925916	0.916	0.385	0	4
Lig1	0	0.916904	0.644	0.147	0	4
Aspm	0	0.910777	0.566	0.005	0	4
Rad21	0	0.908505	0.896	0.421	0	4
Anp32e	0	0.907899	0.92	0.45	0	4
Kif20a	0	0.895422	0.66	0.012	0	4
Ptma1	0	0.894269	1	1	0	4
Slfn9	0	0.891402	0.595	0.105	0	4
Kif15	0	0.888027	0.673	0.021	0	4
Bub1	0	0.882695	0.707	0.02	0	4
Mcm61	0	0.881014	0.593	0.116	0	4
Jpt1	0	0.878525	0.996	0.959	0	4
Sgo2a	0	0.868629	0.617	0.023	0	4
Bub1b	0	0.861444	0.654	0.007	0	4
Dut	0	0.854185	0.614	0.18	0	4
Kif4	0	0.843488	0.679	0.006	0	4
Fbxo5	0	0.838702	0.538	0.029	0	4
Nap1l1	0	0.83574	0.987	0.868	0	4
Mcm5	0	0.833693	0.596	0.079	0	4
Aurkb	0	0.833219	0.591	0.035	0	4
Diaph3	0	0.832883	0.716	0.03	0	4
Aurka	0	0.832726	0.618	0.022	0	4
Alyref	0	0.829714	0.885	0.463	0	4
Hnrnpab	0	0.827833	0.984	0.851	0	4
Kif22	0	0.816607	0.663	0.035	0	4
Pmf1	0	0.813027	0.786	0.159	0	4
Mcm7	0	0.809828	0.613	0.089	0	4
Cenpw	0	0.799314	0.74	0.073	0	4
Nuf2	0	0.79875	0.688	0.024	0	4
Hjurp	0	0.793178	0.661	0.12	0	4
Hmgn2	0	0.78314	0.863	0.312	0	4
Hdgf	0	0.781876	0.99	0.826	0	4
Cep55	0	0.78103	0.627	0.013	0	4
Snrpd1	0	0.777494	0.963	0.708	0	4
Dtymk	0	0.774005	0.839	0.358	0	4
Mad2l1	0	0.773543	0.738	0.077	0	4
Dbf4	0	0.771084	0.757	0.203	0	4
Usp1	0	0.770576	0.759	0.272	0	4
Ccdc34	0	0.770228	0.845	0.328	0	4
Rad51ap1	0	0.763403	0.587	0.018	0	4
S100a10	0	0.762549	0.998	0.992	0	4
Cdc25b	0	0.760672	0.602	0.105	0	4
Dnajc9	0	0.748109	0.789	0.267	0	4
Ncapd2	0	0.72567	0.64	0.021	0	4
Plp2	0	0.724222	0.893	0.428	0	4
Kif2c	0	0.724207	0.565	0.005	0	4
Esco2	0	0.721799	0.463	0.005	0	4
Cmc2	0	0.721597	0.847	0.338	0	4
Syce2	0	0.718215	0.728	0.178	0	4
Mis18bp1	0	0.713064	0.635	0.104	0	4
Gins2	0	0.711608	0.693	0.162	0	4
Cenpm	0	0.705256	0.644	0.019	0	4
Reep4	0	0.700136	0.763	0.289	0	4
Mthfd2	0	0.698873	0.571	0.096	0	4
Uhrf1	0	0.694373	0.53	0.034	0	4
Cbx5	0	0.690754	0.716	0.203	0	4
Fen1	0	0.685788	0.668	0.19	0	4
Ncapg	0	0.682909	0.599	0.018	0	4
Cenpq	0	0.682515	0.624	0.028	0	4
Anapc11	0	0.678901	0.985	0.854	0	4
Cenph	0	0.678723	0.617	0.028	0	4
Cdca2	0	0.678606	0.542	0.011	0	4
Lockd	0	0.677747	0.574	0.015	0	4
Hist1h1a	0	0.677466	0.419	0.026	0	4
Iqgap3	0	0.659534	0.548	0.027	0	4
Ncaph	0	0.649135	0.568	0.043	0	4
Cit	0	0.648316	0.572	0.015	0	4
Ube2t	0	0.635924	0.553	0.042	0	4
Ddx39	0	0.635532	0.785	0.296	0	4
Hist1h1d	0	0.633925	0.485	0.073	0	4
Rad51	0	0.630495	0.531	0.016	0	4
Dhfr	0	0.630471	0.532	0.073	0	4
Ppia1	0	0.617682	1	1	0	4
Melk	0	0.617351	0.554	0.013	0	4
C330027C09Rik	0	0.614984	0.564	0.023	0	4
Ckap2	0	0.614631	0.512	0.007	0	4
Nde1	0	0.611147	0.662	0.189	0	4
Shcbp1	0	0.609119	0.554	0.011	0	4
Rfc5	0	0.608911	0.633	0.118	0	4
Haus4	0	0.58869	0.643	0.153	0	4
Lrr1	0	0.582499	0.509	0.011	0	4
Nrm	0	0.577915	0.583	0.074	0	4
Hmgb3	0	0.569241	0.533	0.03	0	4
Nek2	0	0.567838	0.474	0.005	0	4
Ska1	0	0.563197	0.505	0.007	0	4
Sgo1	0	0.561114	0.488	0.007	0	4
Ska2	0	0.559815	0.533	0.036	0	4
Rpa2	0	0.55703	0.507	0.111	0	4
Hirip3	0	0.556702	0.529	0.085	0	4
Chaf1a	0	0.555976	0.52	0.065	0	4
Spag5	0	0.555648	0.49	0.006	0	4
Ect2	0	0.554859	0.497	0.013	0	4
Neil3	0	0.550675	0.48	0.008	0	4
Hint1	0	0.550555	1	0.999	0	4
Plk4	0	0.550194	0.554	0.069	0	4
Ncapg2	0	0.540373	0.546	0.101	0	4
E2f8	0	0.531474	0.413	0.025	0	4
Foxm1	0	0.530379	0.516	0.015	0	4
Rfc4	0	0.526365	0.55	0.109	0	4
Chaf1b	0	0.525652	0.448	0.082	0	4
Mcm10	0	0.516979	0.484	0.027	0	4
Kpna2	0	0.515712	0.464	0.075	0	4
Prr11	0	0.510112	0.439	0.006	0	4
Mastl	0	0.508066	0.482	0.024	0	4
Dnph1	0	0.504848	0.564	0.07	0	4
Ncapd3	0	0.502923	0.509	0.114	0	4
Tcf19	0	0.496285	0.414	0.033	0	4
Brca1	0	0.494746	0.444	0.028	0	4
Pola1	0	0.486251	0.472	0.095	0	4
Trim59	0	0.473641	0.446	0.039	0	4
Ttk	0	0.472645	0.461	0.009	0	4
Cenpp	0	0.470586	0.457	0.012	0	4
Cenps	0	0.470153	0.503	0.079	0	4
Pold1	0	0.462811	0.533	0.108	0	4
Ndc1	0	0.461901	0.539	0.082	0	4
Ccnf	0	0.458356	0.392	0.013	0	4
Hist1h3c	0	0.458248	0.328	0.004	0	4
Psat1	0	0.452814	0.481	0.053	0	4
Slc43a3	0	0.449932	0.487	0.041	0	4
Zwilch	0	0.441437	0.438	0.017	0	4
Pkmyt1	0	0.430189	0.446	0.016	0	4
Brip1	0	0.429003	0.39	0.023	0	4
Lmnb2	0	0.428007	0.463	0.072	0	4
Trip13	0	0.427685	0.447	0.034	0	4
Cdca5	0	0.42202	0.411	0.019	0	4
Cenpn	0	0.411461	0.419	0.012	0	4
Haspin	0	0.411325	0.451	0.074	0	4
Prim1	0	0.407242	0.409	0.059	0	4
Cenpk	0	0.401351	0.407	0.029	0	4
Pole	0	0.398912	0.401	0.021	0	4
Ercc6l	0	0.392357	0.384	0.018	0	4
Kntc1	0	0.389044	0.378	0.008	0	4
Poc1a	0	0.382778	0.409	0.028	0	4
Kifc1	0	0.376638	0.369	0.011	0	4
Cdc45	0	0.372023	0.356	0.03	0	4
Troap	0	0.365416	0.336	0.003	0	4
Gen1	0	0.364028	0.36	0.011	0	4
Suv39h1	0	0.364016	0.44	0.076	0	4
Kif14	0	0.362602	0.326	0.002	0	4
Cenpl	0	0.361179	0.401	0.066	0	4
Rad54l	0	0.35857	0.382	0.04	0	4
Mxd3	0	0.356711	0.311	0.003	0	4
Espl1	0	0.356482	0.354	0.01	0	4
Psmc3ip	0	0.356013	0.371	0.041	0	4
Arhgef39	0	0.353868	0.337	0.01	0	4
Eme1	0	0.353801	0.361	0.009	0	4
Sapcd2	0	0.350733	0.311	0.002	0	4
Blm	0	0.348394	0.404	0.064	0	4
Cenpu	0	0.346833	0.422	0.07	0	4
Rad18	0	0.345759	0.389	0.054	0	4
Cenpi	0	0.339844	0.362	0.013	0	4
Cdc25c	0	0.336236	0.326	0.003	0	4
Dtl	0	0.333433	0.314	0.031	0	4
Ccsap	0	0.332577	0.336	0.024	0	4
2610318N02Rik	0	0.31965	0.368	0.051	0	4
Ska3	0	0.317381	0.325	0.005	0	4
Aunip	0	0.317296	0.31	0.005	0	4
Bora	0	0.316723	0.34	0.044	0	4
Spn	0	0.316084	0.262	0.025	0	4
Stil	0	0.312864	0.315	0.007	0	4
Hist1h3b	0	0.307061	0.257	0.002	0	4
4933404O12Rik	0	0.306925	0.38	0.052	0	4
Depdc1a	0	0.303211	0.278	0.003	0	4
Ankle1	0	0.300942	0.3	0.002	0	4
Oip5	0	0.30073	0.317	0.009	0	4
Efcab11	0	0.299197	0.313	0.009	0	4
Kif18a	0	0.296537	0.293	0.009	0	4
Fignl1	0	0.296256	0.314	0.025	0	4
Mtfr2	0	0.295566	0.296	0.008	0	4
Kif18b	0	0.286999	0.284	0.002	0	4
Ccdc18	0	0.274265	0.273	0.015	0	4
Spata24	0	0.268048	0.323	0.043	0	4
Gtse1	0	0.265539	0.276	0.019	0	4
Phf19	0	0.259588	0.283	0.017	0	4
Nsl1	0	0.259352	0.27	0.014	0	4
Bard1	0	0.255453	0.253	0.009	0	4
Chtf18	0	0.253251	0.275	0.014	0	4
Haus1	5e-305	0.397055	0.512	0.113	7.92e-301	4
Hist1h4d	9.02e-304	0.498831	0.464	0.096	1.43e-299	4
Cep128	5.16e-302	0.389624	0.44	0.084	8.18e-298	4
Rbbp7	1.69e-301	0.746582	0.868	0.431	2.68e-297	4
Banf1	7.47e-300	0.667064	0.967	0.73	1.18e-295	4
Atad2	2.23e-297	0.993674	0.705	0.261	3.53e-293	4
Mrpl51	8.68e-297	0.652729	0.991	0.854	1.38e-292	4
Snrpb	6.18e-296	0.606652	0.994	0.937	9.79e-292	4
Lsm5	3.44e-295	0.600586	0.781	0.299	5.46e-291	4
Mcm3	3.91e-294	0.777538	0.622	0.191	6.21e-290	4
Hist1h3e	4e-293	0.347518	0.312	0.043	6.34e-289	4
Hsp90aa11	8.6e-293	0.785133	0.993	0.967	1.36e-288	4
Cdk5rap2	8.23e-291	0.481976	0.584	0.155	1.3e-286	4
Haus5	9.67e-289	0.285	0.35	0.054	1.53e-284	4
Psip1	2.31e-287	0.555325	0.614	0.177	3.67e-283	4
Arhgap11a	5.46e-285	0.449952	0.512	0.122	8.66e-281	4
Hist1h2ap	7.79e-285	2.40891	0.84	0.492	1.24e-280	4
Ybx1	1.06e-284	0.474456	1	1	1.68e-280	4
Tmsb101	4.13e-282	0.793869	0.999	0.99	6.55e-278	4
Cdkn2d	4.74e-282	1.01261	0.812	0.419	7.52e-278	4
S100a41	3.46e-280	0.835626	0.785	0.287	5.48e-276	4
Gpsm2	1.44e-279	0.309326	0.36	0.06	2.29e-275	4
Topbp1	6.62e-278	0.618298	0.691	0.241	1.05e-273	4
Gins1	6.98e-278	0.272757	0.318	0.047	1.11e-273	4
Hnrnpa3	2.2e-277	0.703675	0.991	0.867	3.49e-273	4
Anapc5	2.81e-277	0.678343	0.929	0.628	4.46e-273	4
Brca2	2.36e-276	0.301166	0.316	0.047	3.74e-272	4
Ranbp11	1.1e-275	0.840402	0.958	0.735	1.74e-271	4
Tipin	5.18e-273	0.580287	0.553	0.155	8.21e-269	4
Mis18a	2.66e-272	0.435354	0.543	0.141	4.21e-268	4
Rcc1	3.93e-271	0.29513	0.347	0.057	6.22e-267	4
Clic11	3.18e-266	0.462397	1	1	5.05e-262	4
Cbx3	6.13e-265	0.625081	0.869	0.442	9.72e-261	4
Hells	1.67e-264	0.420047	0.349	0.06	2.65e-260	4
Nup43	5.29e-264	0.332876	0.398	0.077	8.39e-260	4
Impa2	2.08e-262	0.346769	0.443	0.095	3.3e-258	4
Dynlt1f	1.43e-261	0.587733	0.821	0.368	2.27e-257	4
Timeless	6.17e-261	0.262466	0.276	0.037	9.78e-257	4
Tubg1	4.26e-254	0.470523	0.6	0.185	6.76e-250	4
Exosc8	4.69e-253	0.586164	0.773	0.33	7.43e-249	4
Dek	1.58e-252	0.738643	0.961	0.794	2.5e-248	4
Orc6	1.79e-252	0.491296	0.5	0.131	2.85e-248	4
Atad5	5.68e-251	0.318811	0.325	0.054	9e-247	4
Srsf3	2.89e-248	0.665718	0.972	0.803	4.58e-244	4
Nudc	2.75e-247	0.593218	0.982	0.831	4.36e-243	4
Hat1	5.14e-246	0.635086	0.699	0.278	8.15e-242	4
Ttf2	1.81e-244	0.316461	0.39	0.079	2.87e-240	4
Myef2	5.05e-243	0.347324	0.436	0.098	8.01e-239	4
Lbr	5.68e-243	0.429234	0.578	0.168	9.01e-239	4
Nup107	6.79e-241	0.271655	0.351	0.065	1.08e-236	4
Ssna1	1.61e-240	0.584851	0.945	0.693	2.55e-236	4
Smc1a	6.06e-240	0.669059	0.951	0.698	9.6e-236	4
Nup35	7.2e-240	0.36606	0.464	0.114	1.14e-235	4
Vim1	9.79e-240	0.700036	1	0.997	1.55e-235	4
Serbp1	1.45e-239	0.517246	0.998	0.981	2.3e-235	4
Asns	4.68e-236	0.342852	0.306	0.051	7.41e-232	4
Ccne1	1.86e-235	0.472943	0.312	0.055	2.96e-231	4
Nasp	2.27e-235	0.665988	0.738	0.319	3.61e-231	4
G2e3	1.68e-234	0.388985	0.423	0.097	2.66e-230	4
Cenpt	1.68e-234	0.312488	0.41	0.089	2.66e-230	4
Bub3	2.97e-233	0.667828	0.884	0.562	4.7e-229	4
Mms22l	4.39e-233	0.258943	0.317	0.055	6.96e-229	4
Haus8	6.78e-233	0.521317	0.719	0.28	1.07e-228	4
Snrpe	1.21e-232	0.579827	0.975	0.81	1.92e-228	4
Hnrnpa1	1.77e-231	0.641685	0.918	0.624	2.8e-227	4
Lsm4	2.05e-230	0.593744	0.937	0.661	3.26e-226	4
Eif1ad	6.04e-230	0.590757	0.828	0.438	9.58e-226	4
Rbm31	3.4e-229	0.60598	0.965	0.789	5.39e-225	4
Tex30	2.03e-225	0.304697	0.393	0.085	3.22e-221	4
Ssrp1	3.34e-224	0.59944	0.913	0.627	5.3e-220	4
Mrpl18	3.73e-223	0.582109	0.946	0.819	5.91e-219	4
Ulbp1	3.83e-222	0.510063	0.642	0.235	6.07e-218	4
Haus3	3.9e-222	0.359635	0.461	0.118	6.18e-218	4
Snrpa1	3.95e-222	0.595068	0.834	0.434	6.26e-218	4
Cntln	4.87e-222	0.338882	0.401	0.09	7.72e-218	4
Gapdh1	2.04e-221	0.441993	1	1	3.24e-217	4
Wee1	9.84e-221	0.402551	0.46	0.12	1.56e-216	4
Rnaseh2c	1.18e-220	0.568582	0.946	0.706	1.87e-216	4
Rbbp8	5.11e-220	0.340252	0.445	0.111	8.11e-216	4
Timm50	1.61e-219	0.549994	0.815	0.41	2.55e-215	4
Nsd2	2.11e-219	0.679928	0.706	0.304	3.34e-215	4
Slc7a1	2.95e-218	0.253203	0.297	0.051	4.68e-214	4
Mcm2	3.93e-218	0.467332	0.444	0.115	6.23e-214	4
Hnrnpu	1.06e-217	0.602507	0.993	0.946	1.68e-213	4
Ckap5	5.37e-217	0.663496	0.754	0.367	8.51e-213	4
Ncaph2	5.91e-217	0.557469	0.834	0.444	9.38e-213	4
Hmgn1	8.86e-216	0.585448	0.971	0.811	1.4e-211	4
Vrk1	1.4e-215	0.415499	0.58	0.188	2.22e-211	4
Pbdc1	2.71e-215	0.583039	0.917	0.597	4.3e-211	4
Lsm3	2.87e-215	0.561816	0.873	0.513	4.55e-211	4
Raly	8.05e-215	0.528898	0.974	0.844	1.28e-210	4
Rbl1	2.56e-214	0.346385	0.422	0.103	4.05e-210	4
Gcat	2.27e-213	0.271317	0.344	0.069	3.6e-209	4
Haus6	3.27e-211	0.278721	0.345	0.07	5.18e-207	4
Reep5	4.35e-210	0.422155	0.998	0.998	6.89e-206	4
Set	2.51e-209	0.586635	0.971	0.886	3.99e-205	4
Nemp1	5.88e-209	0.263366	0.321	0.062	9.32e-205	4
Pole3	7.67e-209	0.470501	0.743	0.322	1.22e-204	4
Hnrnpa2b1	6.33e-208	0.498768	0.997	0.974	1e-203	4
Rnf26	1.41e-207	0.398938	0.587	0.199	2.23e-203	4
Dpy30	1.89e-207	0.547265	0.874	0.549	3e-203	4
Cep57l1	3.65e-207	0.305337	0.38	0.086	5.79e-203	4
Tuba1a	4.44e-207	0.650672	0.803	0.415	7.03e-203	4
Sass6	2.29e-205	0.339529	0.436	0.111	3.63e-201	4
Hpf1	3.13e-205	0.645307	0.886	0.597	4.95e-201	4
Cdkn2aipnl	4.38e-204	0.493576	0.729	0.316	6.95e-200	4
Rpl22l11	1.46e-203	0.521625	0.995	0.94	2.32e-199	4
G3bp1	2.68e-203	0.552197	0.89	0.564	4.24e-199	4
Nudt21	1.25e-202	0.520648	0.816	0.434	1.99e-198	4
Fam111a1	1.56e-202	0.729396	0.847	0.535	2.47e-198	4
Jpt2	1.24e-200	0.309177	0.425	0.108	1.96e-196	4
Gemin6	1.81e-200	0.295332	0.386	0.091	2.87e-196	4
Tubb6	1.24e-199	0.630952	0.918	0.672	1.96e-195	4
Dctpp1	1.72e-198	0.586361	0.814	0.447	2.72e-194	4
Tpm4	2.92e-198	0.512168	0.988	0.865	4.63e-194	4
Prdx41	3.09e-198	0.554011	0.991	0.892	4.9e-194	4
Calm11	5.09e-198	0.351479	1	1	8.07e-194	4
Ppil1	5.33e-197	0.415066	0.539	0.178	8.45e-193	4
Atp5b	4.86e-196	0.418019	0.999	0.994	7.71e-192	4
Rbmx2	5.06e-196	0.322319	0.443	0.12	8.02e-192	4
Wdhd1	3.48e-195	0.288015	0.323	0.066	5.52e-191	4
Prelid1	7.19e-195	0.433925	0.997	0.981	1.14e-190	4
Sumo2	1.12e-194	0.507096	0.989	0.959	1.78e-190	4
Nxt1	3.48e-194	0.49569	0.69	0.299	5.52e-190	4
Cenpc1	5.01e-193	0.399386	0.513	0.163	7.94e-189	4
Nup37	8.64e-192	0.32798	0.429	0.115	1.37e-187	4
Cep192	1.32e-191	0.416574	0.55	0.187	2.09e-187	4
Shmt2	8.29e-191	0.333573	0.466	0.135	1.31e-186	4
Mgst31	2.45e-190	0.586272	0.938	0.681	3.89e-186	4
Prim2	5.21e-190	0.285943	0.38	0.091	8.25e-186	4
1700025G04Rik	5.28e-190	0.366289	0.484	0.145	8.37e-186	4
Ubl4a	7.69e-190	0.515302	0.828	0.452	1.22e-185	4
Tcp1	9.35e-190	0.475002	0.973	0.838	1.48e-185	4
Hist2h2ac	3.87e-189	0.776186	0.55	0.206	6.13e-185	4
Impdh2	4.17e-188	0.535842	0.743	0.361	6.61e-184	4
U2af1	6.85e-186	0.534714	0.92	0.667	1.09e-181	4
Lgals11	2.59e-185	0.412752	1	0.999	4.11e-181	4
Pck2	3.69e-185	0.418163	0.567	0.199	5.86e-181	4
Rbmx	7.84e-184	0.310742	0.417	0.111	1.24e-179	4
Ppih	9.85e-184	0.46225	0.723	0.333	1.56e-179	4
Calm3	1.08e-183	0.420611	0.997	0.977	1.71e-179	4
Nudt4	1.27e-183	0.490569	0.783	0.396	2.01e-179	4
Timm8a1	5.37e-182	0.419042	0.58	0.214	8.52e-178	4
Actg11	2.15e-181	0.557741	0.997	0.999	3.4e-177	4
Rpa3	2.99e-181	0.407177	0.567	0.207	4.73e-177	4
Krtcap2	3.66e-181	0.458881	0.985	0.901	5.8e-177	4
Gatm1	1.07e-180	0.547527	0.955	0.723	1.69e-176	4
Srsf7	8.44e-180	0.584741	0.818	0.485	1.34e-175	4
Smc3	1.97e-179	0.529676	0.785	0.409	3.12e-175	4
Cep89	2.91e-179	0.326922	0.361	0.089	4.61e-175	4
Rnaseh2b	4.14e-179	0.34522	0.548	0.187	6.57e-175	4
Nme1	4.94e-179	0.492227	0.979	0.865	7.83e-175	4
Cycs1	8.04e-178	0.552873	0.905	0.631	1.27e-173	4
Pcnt	3.66e-177	0.410783	0.573	0.209	5.8e-173	4
Txnl1	1.06e-176	0.483232	0.938	0.729	1.68e-172	4
Gins4	8.57e-176	0.435278	0.716	0.334	1.36e-171	4
H1f0	1.12e-175	0.807158	0.728	0.392	1.77e-171	4
Nup155	2.5e-175	0.305716	0.418	0.116	3.97e-171	4
Nop58	4e-175	0.424706	0.614	0.239	6.34e-171	4
Hnrnpf	4.82e-175	0.44283	0.999	0.975	7.64e-171	4
Ilf2	3.13e-173	0.397617	0.634	0.256	4.96e-169	4
Cnih4	2.42e-172	0.510038	0.917	0.692	3.84e-168	4
Sf3b5	1.29e-171	0.42643	0.985	0.931	2.05e-167	4
Lsm8	2.21e-171	0.497137	0.765	0.409	3.51e-167	4
Tbc1d31	3.89e-171	0.310575	0.423	0.12	6.17e-167	4
Pfn11	6.1e-171	0.337723	1	1	9.68e-167	4
Eri1	6.72e-171	0.484487	0.664	0.299	1.07e-166	4
Dnmt1	9.9e-171	0.689123	0.74	0.398	1.57e-166	4
Elof1	1.21e-170	0.444829	0.955	0.793	1.92e-166	4
Rnaseh2a	1.65e-170	0.393211	0.63	0.257	2.62e-166	4
Gm42047	4.13e-169	0.342834	0.37	0.096	6.55e-165	4
Pgk11	1.98e-168	0.502644	0.997	0.956	3.13e-164	4
Ywhae	1.57e-167	0.383799	0.999	0.988	2.49e-163	4
Trim37	5.3e-167	0.33186	0.465	0.147	8.41e-163	4
Pgam1	7.13e-167	0.440812	0.999	0.993	1.13e-162	4
Pa2g4	8.3e-166	0.549907	0.835	0.536	1.32e-161	4
Nhp2	8.23e-165	0.52283	0.933	0.736	1.3e-160	4
Sec11c	7.15e-163	0.420426	0.995	0.975	1.13e-158	4
Lmf2	7.23e-163	0.398544	0.647	0.277	1.15e-158	4
Wdr76	1.07e-162	0.279209	0.338	0.084	1.69e-158	4
Nans	1.11e-162	0.481274	0.82	0.464	1.77e-158	4
Ptges3	1.51e-162	0.522915	0.905	0.692	2.39e-158	4
Basp11	2.04e-162	0.541144	0.989	0.954	3.23e-158	4
Larp7	4.94e-162	0.353525	0.578	0.219	7.84e-158	4
Erh	2.63e-161	0.497601	0.87	0.599	4.18e-157	4
Ywhah	3.18e-161	0.415927	0.999	0.973	5.05e-157	4
Xpo1	3.9e-161	0.459425	0.776	0.408	6.18e-157	4
Chek2	5.88e-161	0.281989	0.398	0.112	9.32e-157	4
Pradc1	7.47e-161	0.250022	0.366	0.096	1.18e-156	4
Mcm4	1.18e-160	0.415587	0.445	0.144	1.88e-156	4
Vars	3.86e-160	0.381019	0.552	0.208	6.11e-156	4
Cdk4	2.32e-159	0.472476	0.925	0.742	3.67e-155	4
Rpa1	5.22e-159	0.358036	0.484	0.166	8.27e-155	4
Ywhaq	1.45e-158	0.462508	0.959	0.836	2.29e-154	4
Nubp1	2.44e-158	0.428142	0.748	0.387	3.86e-154	4
Nqo2	2.83e-158	0.426331	0.673	0.308	4.49e-154	4
Snrnp25	3.88e-158	0.420022	0.738	0.372	6.15e-154	4
Itgb3bp	9.26e-158	0.289534	0.423	0.127	1.47e-153	4
Fam96a	2.41e-157	0.479789	0.955	0.812	3.83e-153	4
Lmo4	3.59e-157	0.364117	0.613	0.246	5.7e-153	4
Dazap1	1.02e-156	0.427448	0.751	0.38	1.62e-152	4
Snrpf	4.66e-156	0.471879	0.885	0.617	7.39e-152	4
Rad50	5.19e-156	0.490951	0.747	0.388	8.23e-152	4
Lsm11	2.82e-155	0.273819	0.394	0.113	4.47e-151	4
Oaz1	1.23e-154	0.290362	1	1	1.95e-150	4
Npm1	2.16e-153	0.39327	1	0.997	3.43e-149	4
Fam92a	1.11e-152	0.352903	0.509	0.184	1.76e-148	4
Actb	8.11e-152	0.362144	0.999	1	1.29e-147	4
Nsmce1	9.78e-152	0.469457	0.803	0.46	1.55e-147	4
Dcps	2.59e-151	0.340636	0.585	0.234	4.1e-147	4
Atp5f1	3.76e-151	0.353535	0.998	0.991	5.97e-147	4
Cbx1	4.5e-151	0.451117	0.851	0.547	7.13e-147	4
Sfpq	1.02e-150	0.497677	0.929	0.732	1.61e-146	4
Pdzd11	1.12e-150	0.417898	0.771	0.409	1.78e-146	4
Rpsa	2.47e-148	0.274836	1	1	3.91e-144	4
Tfdp1	3.21e-148	0.369047	0.54	0.21	5.09e-144	4
Stip1	3.84e-148	0.435138	0.773	0.417	6.08e-144	4
Ndufab1	7.37e-148	0.422878	0.976	0.901	1.17e-143	4
Atp5o.1	7.74e-148	0.439798	0.985	0.929	1.23e-143	4
Pnp1	1.57e-147	0.460231	0.97	0.871	2.49e-143	4
Metap2	3.71e-147	0.398157	0.99	0.9	5.89e-143	4
Cep83	8.26e-147	0.431713	0.65	0.302	1.31e-142	4
Ncl	8.6e-147	0.428398	0.999	0.981	1.36e-142	4
Pcp4l11	3.48e-146	0.578596	0.836	0.526	5.51e-142	4
Rdx	6.1e-146	0.44014	0.935	0.735	9.67e-142	4
Rfwd3	7.12e-146	0.302206	0.466	0.158	1.13e-141	4
Tuba1c	1.37e-143	0.602201	0.823	0.575	2.17e-139	4
Bag1	1.91e-143	0.363719	0.994	0.966	3.02e-139	4
Pcna1	2.06e-143	0.757276	0.792	0.532	3.27e-139	4
Hp1bp3	3.16e-143	0.499393	0.902	0.677	5.01e-139	4
Cct7	3.52e-143	0.424952	0.945	0.807	5.57e-139	4
Cryl1	4.81e-143	0.382571	0.695	0.336	7.63e-139	4
Serpinb1c	2.18e-142	0.301936	0.415	0.129	3.45e-138	4
Pih1d1	2.93e-142	0.426307	0.811	0.473	4.65e-138	4
Ubald2	3.1e-142	0.636647	0.88	0.726	4.91e-138	4
Uchl5	3.27e-142	0.432084	0.725	0.387	5.18e-138	4
Sms	4.53e-142	0.452325	0.837	0.524	7.18e-138	4
Cbfb	9.96e-142	0.390187	0.643	0.297	1.58e-137	4
Alcam	1.31e-141	0.54262	0.928	0.735	2.07e-137	4
Chchd1	4.69e-141	0.406234	0.955	0.799	7.43e-137	4
Psmg2	1.22e-140	0.328177	0.545	0.215	1.93e-136	4
Hmgn5	4.17e-140	0.31417	0.459	0.157	6.61e-136	4
Eif5a	7.65e-140	0.397169	1	0.989	1.21e-135	4
Eif4e	1.03e-139	0.476298	0.833	0.545	1.64e-135	4
Cep70	1.55e-139	0.26205	0.384	0.115	2.45e-135	4
Kpnb1	2.27e-139	0.416027	0.716	0.368	3.61e-135	4
Ak6	2.78e-139	0.45248	0.762	0.43	4.41e-135	4
Coq7	6.97e-139	0.396685	0.694	0.35	1.11e-134	4
Smc6	9.05e-139	0.510049	0.856	0.63	1.43e-134	4
Fzr1	4.05e-138	0.432983	0.629	0.302	6.43e-134	4
Lin54	2.5e-137	0.307529	0.445	0.152	3.97e-133	4
Snrpd2	3.61e-137	0.388152	0.985	0.914	5.72e-133	4
Smchd1	1.6e-136	0.48128	0.823	0.535	2.54e-132	4
Timm13	4.31e-136	0.328459	0.995	0.987	6.83e-132	4
Snrpg	1.53e-135	0.420236	0.906	0.708	2.43e-131	4
Tomm20	2.31e-135	0.360751	0.995	0.981	3.66e-131	4
Cox5b1	2.71e-134	0.3214	1	0.993	4.3e-130	4
Kcnn41	3.13e-134	0.438322	0.506	0.195	4.97e-130	4
Ubap2	3.91e-134	0.381401	0.666	0.32	6.2e-130	4
Faap24	2.1e-133	0.268119	0.362	0.109	3.34e-129	4
Rheb	5.06e-133	0.391855	0.963	0.853	8.02e-129	4
Cep295	5.75e-133	0.279354	0.414	0.135	9.12e-129	4
Ptpn7	7.81e-133	0.427353	0.726	0.39	1.24e-128	4
Carhsp1	1.02e-132	0.368336	0.659	0.311	1.61e-128	4
Mrpl49	1.85e-132	0.37325	0.63	0.295	2.94e-128	4
Vma211	2.32e-132	0.474811	0.864	0.604	3.69e-128	4
Metrn	2.85e-132	0.313036	0.536	0.213	4.51e-128	4
Nup133	8.15e-132	0.283219	0.459	0.164	1.29e-127	4
Lnpk	1.43e-131	0.270091	0.453	0.158	2.27e-127	4
Npm3	1.67e-131	0.389215	0.657	0.321	2.65e-127	4
Cse1l	1.45e-130	0.303997	0.481	0.18	2.3e-126	4
Eif1ax	2.53e-130	0.418099	0.847	0.572	4.02e-126	4
Rfc3	3.92e-130	0.362818	0.501	0.2	6.22e-126	4
Tsn	4.74e-130	0.391056	0.946	0.768	7.52e-126	4
Mrpl28	6.53e-130	0.389212	0.974	0.882	1.03e-125	4
Snrpc	6.93e-129	0.412522	0.928	0.754	1.1e-124	4
Rdh11	7.06e-129	0.291589	0.476	0.176	1.12e-124	4
Hras	7.27e-129	0.394531	0.935	0.75	1.15e-124	4
Pola2	8.7e-129	0.26071	0.386	0.123	1.38e-124	4
Zfp91	9.94e-129	0.394135	0.968	0.86	1.58e-124	4
Tmem237	1.49e-128	0.266076	0.431	0.148	2.36e-124	4
Cdt1	4.76e-128	0.41866	0.477	0.189	7.55e-124	4
Mrpl42	8.22e-128	0.40457	0.936	0.779	1.3e-123	4
Pin1	1.34e-127	0.406586	0.902	0.678	2.12e-123	4
Mapre1	2.16e-127	0.390124	0.942	0.78	3.43e-123	4
Slc25a10	1.53e-126	0.345764	0.553	0.237	2.42e-122	4
Vdac3	2.16e-126	0.406928	0.916	0.72	3.42e-122	4
Hist1h4h	5.17e-126	0.2788	0.311	0.086	8.2e-122	4
Nav2	6.02e-126	0.477923	0.693	0.371	9.54e-122	4
Gnb2	6.54e-126	0.299811	1	0.997	1.04e-121	4
Naa50	1.04e-125	0.429106	0.888	0.674	1.65e-121	4
Ube2m	1.09e-125	0.3445	0.986	0.931	1.73e-121	4
Acp1	1.84e-125	0.3934	0.858	0.57	2.93e-121	4
Milr1	1.6e-124	0.398743	0.942	0.764	2.54e-120	4
Pcmt1	2.19e-124	0.39956	0.887	0.654	3.48e-120	4
Cox7a2	2.29e-124	0.304483	1	0.996	3.63e-120	4
Uchl3	4.73e-124	0.357052	0.642	0.312	7.5e-120	4
Nmral1	5.15e-124	0.302911	0.451	0.167	8.16e-120	4
Vbp1	6.1e-124	0.341924	0.558	0.243	9.67e-120	4
Msh5	8.96e-124	0.287935	0.481	0.183	1.42e-119	4
Gle1	1.01e-123	0.26442	0.429	0.15	1.6e-119	4
Srrt	1.08e-123	0.403623	0.727	0.408	1.71e-119	4
Srsf2	1.21e-123	0.419371	0.963	0.84	1.92e-119	4
Lyar	1.49e-123	0.331725	0.541	0.228	2.36e-119	4
Pole41	1.52e-123	0.424995	0.742	0.429	2.41e-119	4
Atp5g2	1.89e-123	0.26081	1	0.999	3e-119	4
Rnh11	2.13e-123	0.437337	0.999	0.986	3.38e-119	4
Slbp	3.78e-123	0.547526	0.599	0.313	6e-119	4
Atp5g3	4.04e-123	0.341138	0.993	0.96	6.41e-119	4
Atpif1	6.08e-123	0.302435	1	0.999	9.65e-119	4
Nudt5	1.37e-122	0.347726	0.588	0.268	2.17e-118	4
Hspa14	3.21e-122	0.375612	0.662	0.344	5.09e-118	4
Rps27l	1.62e-121	0.326618	0.998	0.994	2.57e-117	4
Miip	2.48e-121	0.311765	0.448	0.167	3.93e-117	4
Rnps1	1.22e-120	0.389774	0.699	0.38	1.94e-116	4
Cox5a	1.67e-120	0.325936	1	0.997	2.64e-116	4
Taf15	1.85e-120	0.377009	0.665	0.339	2.94e-116	4
Nelfe	5.24e-120	0.393673	0.739	0.428	8.31e-116	4
Suz12	8.22e-120	0.40175	0.714	0.393	1.3e-115	4
2021-09-07	1.05e-119	0.384966	0.973	0.899	1.66e-115	4
Swi5	1.06e-118	0.335184	0.995	0.969	1.69e-114	4
Prmt1	1.93e-117	0.383192	0.732	0.413	3.06e-113	4
H3f3b	3.8e-117	0.381453	1	1	6.03e-113	4
Ssbp3	5.25e-117	0.331851	0.578	0.265	8.33e-113	4
1810037I17Rik	4.38e-116	0.395435	0.959	0.891	6.95e-112	4
Asf1a	6.5e-116	0.255555	0.396	0.136	1.03e-111	4
Lsm6	1.97e-115	0.37128	0.741	0.427	3.12e-111	4
Psmb6	2.49e-115	0.356714	0.998	0.993	3.94e-111	4
Tmco1	3.61e-115	0.358776	0.95	0.829	5.72e-111	4
Dynll2	3.68e-115	0.427176	0.837	0.599	5.84e-111	4
Pgp	3.78e-115	0.412601	0.771	0.492	5.99e-111	4
Hikeshi	5.98e-115	0.370428	0.793	0.494	9.48e-111	4
Snrnp40	1.1e-114	0.323473	0.618	0.298	1.74e-110	4
Bckdk	4.89e-114	0.365986	0.718	0.404	7.76e-110	4
Dnajc10	8.2e-114	0.413711	0.758	0.455	1.3e-109	4
Tpi11	1.19e-113	0.388181	0.997	0.974	1.88e-109	4
Tpr	1.22e-113	0.362987	0.994	0.976	1.93e-109	4
Txn11	1.57e-113	0.298662	0.999	0.999	2.49e-109	4
Ptgr1	3.19e-113	0.40168	0.82	0.548	5.06e-109	4
Ilf3	3.48e-113	0.341566	0.591	0.283	5.52e-109	4
Nsmce4a	5.68e-113	0.373989	0.753	0.449	9.01e-109	4
Dnajc19	6.52e-113	0.35918	0.926	0.741	1.03e-108	4
Smdt1	1.14e-111	0.27225	1	0.998	1.81e-107	4
Cfl11	1.29e-111	0.254313	1	1	2.04e-107	4
Ccl22	4.69e-111	1.00887	0.803	0.569	7.43e-107	4
Atp5j	5.72e-111	0.277749	0.997	0.995	9.07e-107	4
Uqcrq	4.72e-110	0.298407	1	0.99	7.48e-106	4
S100a61	8.38e-110	0.345642	0.956	0.854	1.33e-105	4
Ybx3	1.24e-109	0.428407	0.689	0.393	1.96e-105	4
Commd1	1.93e-109	0.353404	0.943	0.805	3.07e-105	4
Thoc7	2.32e-109	0.366354	0.834	0.572	3.67e-105	4
Ctcf	4.31e-109	0.416914	0.812	0.556	6.84e-105	4
2610524H06Rik	4.38e-109	0.282325	0.459	0.182	6.95e-105	4
Dynll1	9.39e-109	0.37822	0.996	0.991	1.49e-104	4
Cenpx	2.1e-108	0.332291	0.988	0.938	3.32e-104	4
Nol7	2.17e-108	0.374933	0.906	0.723	3.44e-104	4
Magt1	2.42e-108	0.379304	0.857	0.606	3.84e-104	4
Brip1os	2.48e-108	0.281862	0.509	0.217	3.94e-104	4
Arpc2	3.06e-108	0.275752	1	1	4.85e-104	4
Id1	5.05e-108	0.400521	0.254	0.067	8.01e-104	4
Pdap1	5.48e-108	0.358754	0.941	0.764	8.69e-104	4
Ssb	8.68e-108	0.36269	0.95	0.842	1.38e-103	4
Emp2	1.17e-107	0.399979	0.521	0.229	1.85e-103	4
Tmem109	1.79e-107	0.363237	0.781	0.475	2.84e-103	4
Rwdd1	2.29e-107	0.345824	0.941	0.8	3.63e-103	4
Tmem1711	2.67e-107	0.310351	0.484	0.196	4.23e-103	4
Itpa	5.49e-107	0.32415	0.647	0.335	8.71e-103	4
Slc35e4	1.24e-106	0.322871	0.58	0.274	1.97e-102	4
Dck	2.41e-106	0.403699	0.547	0.261	3.81e-102	4
Rbbp4	4.55e-106	0.425519	0.81	0.583	7.21e-102	4
Idh2	8.62e-106	0.399853	0.866	0.678	1.37e-101	4
Usp14	1.55e-105	0.379212	0.815	0.549	2.45e-101	4
1110008F13Rik	1.93e-105	0.310433	0.997	0.981	3.07e-101	4
Csrp1	2.83e-105	0.359397	0.772	0.454	4.48e-101	4
Msl3	6.54e-105	0.303133	0.61	0.295	1.04e-100	4
Psma4	9.46e-105	0.330643	0.975	0.909	1.5e-100	4
Nfyb	1.02e-104	0.276374	0.461	0.188	1.61e-100	4
Nt5dc21	3.1e-104	0.470951	0.893	0.714	4.91e-100	4
Slc25a5	4.27e-104	0.351074	0.996	0.983	6.78e-100	4
Pkm1	5.79e-104	0.31814	0.999	0.997	9.18e-100	4
Polr2c	6.12e-104	0.367852	0.752	0.469	9.7e-100	4
Vps36	2.36e-103	0.374323	0.814	0.57	3.74e-99	4
Phf5a	6.78e-103	0.366819	0.874	0.668	1.07e-98	4
Eif4g2	8.54e-103	0.330743	0.992	0.967	1.35e-98	4
Tubgcp2	1.7e-102	0.277942	0.464	0.192	2.69e-98	4
Odf2	2.03e-102	0.333695	0.563	0.272	3.21e-98	4
Fkbp2	2.35e-102	0.304	0.995	0.964	3.72e-98	4
Siva1	2.8e-102	0.518467	0.819	0.642	4.44e-98	4
Angptl2	3.23e-102	0.298246	0.333	0.111	5.13e-98	4
Mrps26	3.8e-102	0.358241	0.933	0.802	6.02e-98	4
Mpp6	4.83e-102	0.376979	0.826	0.562	7.66e-98	4
Vps291	5.63e-102	0.324789	0.989	0.954	8.92e-98	4
Cars	8.31e-102	0.296767	0.509	0.225	1.32e-97	4
Flna	9.87e-102	0.418103	0.901	0.693	1.57e-97	4
Psmb2	1.41e-101	0.317187	0.984	0.927	2.24e-97	4
Cct5	4.07e-101	0.347835	0.934	0.815	6.45e-97	4
Mrpl13	4.65e-101	0.362528	0.824	0.571	7.37e-97	4
Cntrl	1.12e-100	0.312771	0.538	0.247	1.77e-96	4
Sptssa	1.29e-100	0.337766	0.979	0.916	2.05e-96	4
Acot7	1.36e-100	0.258401	0.438	0.175	2.15e-96	4
Mdh1	1.75e-100	0.351655	0.957	0.881	2.78e-96	4
Psmb81	2.46e-100	0.316988	0.998	0.99	3.9e-96	4
Mrfap1	6.98e-100	0.317781	0.992	0.962	1.11e-95	4
Eloc	1.82e-99	0.341558	0.948	0.837	2.89e-95	4
Mb21d1	1.87e-99	0.252307	0.336	0.115	2.97e-95	4
Cyc1	2.86e-99	0.345409	0.927	0.796	4.53e-95	4
Hnrnpa0	4.54e-99	0.355277	0.957	0.862	7.19e-95	4
Apip	1.53e-98	0.335692	0.662	0.369	2.42e-94	4
Fopnl	2.03e-98	0.299507	0.616	0.316	3.22e-94	4
Bex31	2.04e-98	0.394774	0.91	0.736	3.23e-94	4
Agpat5	2.33e-98	0.353994	0.744	0.453	3.69e-94	4
Trim28	3.24e-98	0.327685	0.681	0.389	5.13e-94	4
Gars	3.73e-98	0.324212	0.606	0.312	5.91e-94	4
Ube2a	4.4e-98	0.333903	0.925	0.742	6.97e-94	4
Ruvbl2	7.22e-98	0.262006	0.486	0.21	1.14e-93	4
Atp5a1	1.09e-97	0.278791	0.997	0.994	1.73e-93	4
Calm2	1.19e-97	0.316077	0.998	0.998	1.89e-93	4
Stub1	1.33e-97	0.330114	0.952	0.84	2.11e-93	4
Ezr	3.57e-97	0.27553	0.503	0.223	5.66e-93	4
Cdk6	4.93e-97	0.390325	0.772	0.485	7.81e-93	4
Cep57	6.29e-97	0.303136	0.543	0.258	9.97e-93	4
Arhgdia	8.14e-97	0.264152	0.998	0.995	1.29e-92	4
Mif1	1.55e-96	0.334436	1	0.99	2.45e-92	4
Rexo21	1.74e-96	0.335844	0.95	0.842	2.76e-92	4
Mrpl40	2.98e-96	0.336503	0.683	0.389	4.73e-92	4
Bid	3.33e-95	0.273419	0.492	0.216	5.28e-91	4
Tmsb4x1	3.5e-95	0.262201	1	1	5.56e-91	4
Arpc5l	5.28e-95	0.341615	0.882	0.686	8.37e-91	4
Cpd	8.85e-95	0.384265	0.713	0.43	1.4e-90	4
1810011H11Rik	1.28e-94	0.339559	0.704	0.395	2.03e-90	4
Mast2	1.34e-94	0.265301	0.431	0.178	2.12e-90	4
Mdh2	1.68e-94	0.333955	0.982	0.923	2.66e-90	4
Gcsh	1.8e-94	0.341084	0.735	0.438	2.86e-90	4
Gtf2h5	2.36e-94	0.319111	0.96	0.859	3.74e-90	4
Idh3a	3.58e-94	0.281633	0.493	0.222	5.67e-90	4
Prpf31	3.61e-94	0.345478	0.781	0.509	5.72e-90	4
Ripk3	3.68e-94	0.320193	0.562	0.28	5.83e-90	4
Oat	5.99e-94	0.329402	0.84	0.59	9.5e-90	4
Brd8	8.63e-94	0.34126	0.65	0.363	1.37e-89	4
Gsn1	1.39e-93	0.33797	0.969	0.885	2.2e-89	4
Yif1b	2.47e-93	0.34671	0.887	0.695	3.91e-89	4
Commd10	6.02e-93	0.280545	0.529	0.248	9.55e-89	4
Fkbp3	8.49e-93	0.389862	0.777	0.55	1.35e-88	4
Pde6d	8.73e-93	0.311696	0.64	0.351	1.38e-88	4
Cdc123	1.11e-92	0.332719	0.718	0.443	1.76e-88	4
Park7	1.41e-92	0.313587	0.977	0.937	2.24e-88	4
Parp1	2.21e-92	0.446065	0.773	0.548	3.5e-88	4
Polr3k	2.38e-92	0.272855	0.582	0.29	3.78e-88	4
Gsr	4.67e-92	0.356987	0.768	0.507	7.4e-88	4
Sf3a3	5.28e-92	0.330017	0.714	0.425	8.38e-88	4
Med30	5.45e-92	0.315578	0.681	0.391	8.64e-88	4
Ing1	1.17e-91	0.284402	0.543	0.261	1.85e-87	4
Zcrb1	2.04e-91	0.314259	0.943	0.822	3.24e-87	4
Tcerg1	2.13e-91	0.33334	0.692	0.396	3.38e-87	4
Uqcr10	2.26e-91	0.261124	0.999	0.989	3.58e-87	4
Rnf7	2.27e-91	0.296643	0.982	0.928	3.6e-87	4
Snu13	4.25e-91	0.372378	0.938	0.832	6.74e-87	4
Ugdh	4.92e-91	0.275414	0.576	0.285	7.79e-87	4
Reps1	5.91e-91	0.25184	0.454	0.195	9.37e-87	4
Rpp30	6.38e-91	0.267478	0.491	0.225	1.01e-86	4
Abracl	6.9e-91	0.318134	0.977	0.9	1.09e-86	4
Gipc1	9.07e-91	0.333127	0.869	0.665	1.44e-86	4
Ube2i	1.12e-90	0.287366	0.992	0.947	1.78e-86	4
Cinp	1.23e-90	0.306887	0.6	0.317	1.94e-86	4
Med19	1.95e-90	0.303938	0.6	0.317	3.09e-86	4
Tpm11	1.96e-90	0.374794	0.867	0.638	3.1e-86	4
Ppp1r2	2.45e-90	0.315928	0.805	0.553	3.88e-86	4
Immt	4.3e-90	0.343811	0.869	0.69	6.82e-86	4
Psmc3	4.95e-90	0.325317	0.938	0.833	7.84e-86	4
Pdcd5	5.48e-90	0.306767	0.957	0.876	8.68e-86	4
Anapc15	6.51e-90	0.313081	0.746	0.447	1.03e-85	4
Hspd11	6.6e-90	0.42246	0.938	0.853	1.05e-85	4
Actl6a	1.1e-89	0.304146	0.664	0.372	1.74e-85	4
Aldh9a1	1.82e-89	0.346533	0.693	0.415	2.89e-85	4
Kdelr2	3.92e-89	0.340392	0.739	0.462	6.22e-85	4
Oxct1	6.39e-89	0.368486	0.916	0.753	1.01e-84	4
Ap1s11	7.35e-89	0.315185	0.939	0.79	1.16e-84	4
Mrpl57	1.18e-88	0.327816	0.919	0.782	1.88e-84	4
Mrpl35	3.74e-88	0.304122	0.733	0.448	5.93e-84	4
Nop56	4.59e-88	0.390831	0.657	0.38	7.29e-84	4
Alad	8.06e-88	0.359323	0.639	0.379	1.28e-83	4
Syncrip	8.34e-88	0.345405	0.822	0.586	1.32e-83	4
Pfdn6	1.06e-87	0.321547	0.86	0.674	1.68e-83	4
Babam1	1.12e-87	0.327971	0.763	0.5	1.77e-83	4
Clec2i	2.25e-87	0.298934	0.437	0.189	3.57e-83	4
Mrpl33	2.57e-87	0.295514	0.957	0.863	4.08e-83	4
Sap30	2.95e-87	0.366733	0.74	0.471	4.67e-83	4
Eif3c	4.03e-87	0.287448	0.992	0.972	6.39e-83	4
Supt16	7.51e-87	0.388206	0.858	0.701	1.19e-82	4
Fmnl1	1.93e-86	0.287164	0.522	0.252	3.06e-82	4
Luc7l3	2.02e-86	0.347396	0.836	0.606	3.21e-82	4
Ndufb8	2.15e-86	0.257067	0.994	0.988	3.41e-82	4
Srrm1	2.71e-86	0.298191	0.965	0.887	4.3e-82	4
Ppm1g	2.93e-86	0.351292	0.712	0.445	4.64e-82	4
Srp9	3.62e-86	0.261502	0.996	0.96	5.74e-82	4
Ube2e3	3.66e-86	0.322577	0.711	0.438	5.8e-82	4
Acadl	4.04e-86	0.329218	0.915	0.762	6.41e-82	4
Pnn	6e-86	0.360051	0.788	0.54	9.51e-82	4
Psma21	8.68e-86	0.290635	0.986	0.94	1.38e-81	4
Ube2d2a	5.45e-85	0.291053	0.957	0.857	8.64e-81	4
Ccnd12	5.59e-85	0.565786	0.706	0.451	8.86e-81	4
Psmd7	1.11e-84	0.317999	0.928	0.823	1.76e-80	4
Rfc2	1.34e-84	0.376429	0.813	0.62	2.13e-80	4
Prpf19	3.32e-84	0.298661	0.666	0.387	5.27e-80	4
Lage3	4.98e-84	0.312395	0.793	0.545	7.9e-80	4
Mrps17	5.9e-84	0.323883	0.865	0.672	9.35e-80	4
Gspt1	5.99e-84	0.339391	0.899	0.753	9.5e-80	4
Kmt5a	6.48e-84	0.349111	0.811	0.574	1.03e-79	4
Tcof1	1.11e-83	0.325913	0.734	0.462	1.76e-79	4
Sord	1.11e-83	0.334653	0.637	0.368	1.76e-79	4
Mrps14	1.25e-83	0.277718	0.976	0.93	1.99e-79	4
Lrrcc1	1.56e-83	0.259733	0.551	0.271	2.47e-79	4
Vegfb	3.27e-83	0.312163	0.929	0.793	5.19e-79	4
Cd811	4.25e-83	0.454347	0.654	0.374	6.74e-79	4
Fkbp4	5.16e-83	0.341205	0.677	0.413	8.19e-79	4
Sf3b2	5.35e-83	0.281803	0.983	0.959	8.48e-79	4
Emd	6.57e-83	0.306754	0.727	0.446	1.04e-78	4
Ndufb11	1.18e-82	0.271193	0.995	0.971	1.87e-78	4
Aars	1.23e-82	0.294532	0.619	0.338	1.94e-78	4
Zwint	2.18e-82	0.328751	0.712	0.442	3.45e-78	4
Slc25a24	2.47e-82	0.289251	0.552	0.286	3.92e-78	4
Emc8	5.55e-82	0.321223	0.828	0.615	8.8e-78	4
Hnrnpr	7e-82	0.331563	0.792	0.547	1.11e-77	4
Mrpl12	8.56e-82	0.323453	0.916	0.785	1.36e-77	4
Psmd9	1.17e-81	0.284828	0.677	0.402	1.85e-77	4
Ccl71	1.22e-81	0.791914	0.71	0.474	1.93e-77	4
Rer1	1.64e-81	0.288657	0.951	0.858	2.6e-77	4
Psma3	1.71e-81	0.284167	0.983	0.945	2.7e-77	4
St3gal51	1.84e-81	0.467411	0.585	0.324	2.92e-77	4
Nudcd2	1.86e-81	0.314723	0.698	0.423	2.94e-77	4
Med4	2.67e-81	0.278591	0.562	0.296	4.24e-77	4
Ifrd1	3.06e-81	0.533052	0.788	0.554	4.85e-77	4
Mtch2	4.47e-81	0.315394	0.873	0.695	7.09e-77	4
Fundc2	5.11e-81	0.301234	0.942	0.827	8.1e-77	4
Cd1801	1.18e-80	0.333359	0.889	0.684	1.87e-76	4
Cwc15	1.66e-80	0.333362	0.941	0.84	2.63e-76	4
Gnb1	1.81e-80	0.259308	0.996	0.978	2.87e-76	4
Ccdc25	1.88e-80	0.273843	0.594	0.316	2.98e-76	4
Srpk1	1.91e-80	0.328382	0.739	0.485	3.02e-76	4
Tubb2a	2.05e-80	0.35124	0.973	0.902	3.25e-76	4
Ifi27l2a1	2.74e-80	0.427845	0.995	0.988	4.35e-76	4
Ppp1r7	3.93e-80	0.31173	0.663	0.4	6.24e-76	4
Psmb5	6.82e-80	0.274562	0.987	0.959	1.08e-75	4
Fyn	8.4e-80	0.271856	0.505	0.245	1.33e-75	4
Nono	2.15e-79	0.330128	0.836	0.649	3.42e-75	4
Rtn4	2.71e-79	0.299903	0.998	0.981	4.29e-75	4
Eif4a3	4.32e-79	0.327007	0.825	0.629	6.85e-75	4
Uba2	4.75e-79	0.291555	0.666	0.39	7.54e-75	4
Strap	5.6e-79	0.309869	0.796	0.561	8.87e-75	4
Wdr12	8.57e-79	0.305319	0.536	0.282	1.36e-74	4
Gatad1	9.17e-79	0.310709	0.822	0.612	1.45e-74	4
Cct4	2.32e-78	0.288785	0.953	0.853	3.67e-74	4
Mfsd10	3.19e-78	0.264018	0.569	0.3	5.05e-74	4
Tmem14c	3.42e-78	0.254535	0.994	0.989	5.42e-74	4
Snx21	3.75e-78	0.350701	0.951	0.853	5.95e-74	4
Ddx46	4.05e-78	0.309798	0.833	0.604	6.42e-74	4
Adk	4.69e-78	0.28273	0.627	0.355	7.43e-74	4
Med8	5.94e-78	0.303637	0.868	0.692	9.42e-74	4
Ube2n	6.53e-78	0.30687	0.849	0.663	1.04e-73	4
Pop5	6.79e-78	0.281289	0.637	0.365	1.08e-73	4
Ssr2	7.36e-78	0.317163	0.888	0.708	1.17e-73	4
Psmd14	7.54e-78	0.323195	0.809	0.591	1.2e-73	4
Ndufa121	7.98e-78	0.289462	0.97	0.907	1.26e-73	4
Ddx39b	1.54e-77	0.323742	0.896	0.771	2.44e-73	4
Cmtm7	1.6e-77	0.307519	0.966	0.915	2.53e-73	4
Paics	3.04e-77	0.344952	0.684	0.433	4.83e-73	4
Actn4	3.9e-77	0.325903	0.89	0.72	6.18e-73	4
Snrpd3	4.08e-77	0.307186	0.87	0.702	6.46e-73	4
Eno1	4.67e-77	0.297121	0.978	0.923	7.4e-73	4
Dnajc8	4.89e-77	0.289469	0.932	0.809	7.75e-73	4
Cdk141	7.3e-77	0.330177	0.701	0.424	1.16e-72	4
Slc38a2	7.5e-77	0.27623	0.51	0.254	1.19e-72	4
Cops5	1.22e-76	0.291844	0.749	0.482	1.93e-72	4
Cetn3	1.93e-76	0.304789	0.8	0.577	3.06e-72	4
Baz1b	1.96e-76	0.382034	0.828	0.657	3.1e-72	4
Fubp1	3.34e-76	0.317834	0.82	0.586	5.29e-72	4
Timm22	3.87e-76	0.285032	0.69	0.42	6.14e-72	4
Morf4l2	5.96e-76	0.309918	0.877	0.677	9.44e-72	4
Fmr1	6.55e-76	0.264046	0.551	0.289	1.04e-71	4
Psmd81	7.44e-76	0.275319	0.998	0.99	1.18e-71	4
Lmna	7.62e-76	0.424642	0.952	0.91	1.21e-71	4
Atp5g11	8.31e-76	0.273643	0.988	0.962	1.32e-71	4
Eif6	8.45e-76	0.294837	0.917	0.789	1.34e-71	4
Cep290	1.29e-75	0.261126	0.454	0.21	2.04e-71	4
Ddost	1.53e-75	0.276149	0.947	0.865	2.43e-71	4
Ndufb6	1.56e-75	0.315747	0.892	0.723	2.48e-71	4
Ak2	2.24e-75	0.330812	0.779	0.571	3.55e-71	4
Ahsa11	2.68e-75	0.358784	0.895	0.766	4.25e-71	4
Emg1	5.44e-75	0.313187	0.805	0.581	8.62e-71	4
Dnajc2	6.2e-75	0.307544	0.76	0.505	9.84e-71	4
Ube2k	6.54e-75	0.281365	0.904	0.751	1.04e-70	4
Tssc4	6.77e-75	0.268597	0.538	0.283	1.07e-70	4
Myg1	7.42e-75	0.253458	0.586	0.316	1.18e-70	4
Trim47	9.2e-75	0.260797	0.572	0.306	1.46e-70	4
Khdrbs1	9.78e-75	0.319502	0.824	0.625	1.55e-70	4
Ormdl2	9.87e-75	0.291118	0.775	0.522	1.56e-70	4
Erg28	1.03e-74	0.274083	0.647	0.379	1.63e-70	4
Sf3b4	2.92e-74	0.282844	0.73	0.464	4.64e-70	4
Tmem97	4.27e-74	0.309535	0.631	0.377	6.76e-70	4
Anapc7	6.67e-74	0.261366	0.543	0.287	1.06e-69	4
Psmd13	8.03e-74	0.287778	0.898	0.758	1.27e-69	4
Tuba4a	9.57e-74	0.345702	0.659	0.405	1.52e-69	4
Med28	1.08e-73	0.287857	0.945	0.827	1.71e-69	4
Psmb7	1.19e-73	0.291574	0.888	0.719	1.89e-69	4
Psmd11	1.39e-73	0.309108	0.943	0.853	2.2e-69	4
Sf3b6	1.46e-73	0.274478	0.944	0.837	2.31e-69	4
Zc3h15	1.81e-73	0.299236	0.882	0.686	2.88e-69	4
Naxe	1.98e-73	0.299238	0.886	0.727	3.13e-69	4
Map4	2.49e-73	0.305229	0.714	0.456	3.95e-69	4
Vdac1	3.61e-73	0.288703	0.941	0.849	5.73e-69	4
Atxn10	3.71e-73	0.302721	0.855	0.658	5.88e-69	4
Rbm8a	5.52e-73	0.308035	0.886	0.718	8.74e-69	4
H2afy	1.68e-72	0.269325	0.975	0.914	2.66e-68	4
Cops6	1.87e-72	0.284328	0.896	0.749	2.96e-68	4
Eif3i	2.13e-72	0.269564	0.95	0.861	3.38e-68	4
Lamtor5	2.46e-72	0.260562	0.985	0.94	3.9e-68	4
Cuedc2	2.53e-72	0.266958	0.984	0.924	4.01e-68	4
Smc5	2.77e-72	0.260274	0.538	0.282	4.39e-68	4
Nop9	3.67e-72	0.264137	0.576	0.319	5.82e-68	4
Gps1	6.23e-72	0.309227	0.679	0.433	9.89e-68	4
Cd36	1.02e-71	0.378901	0.885	0.726	1.61e-67	4
Psmc6	1.63e-71	0.297917	0.825	0.651	2.58e-67	4
Mzt1	1.77e-71	0.251654	0.482	0.241	2.81e-67	4
Trappc1	1.92e-71	0.313345	0.855	0.691	3.04e-67	4
Slc39a6	3.57e-71	0.25663	0.552	0.295	5.66e-67	4
Smyd2	4.03e-71	0.253305	0.52	0.271	6.39e-67	4
Bcas2	4.14e-71	0.282009	0.925	0.805	6.56e-67	4
Timm17a1	4.78e-71	0.292199	0.855	0.665	7.58e-67	4
Chchd6	7.2e-71	0.251002	0.537	0.283	1.14e-66	4
Hsd17b12	7.73e-71	0.302641	0.862	0.7	1.23e-66	4
Taf1d	1.08e-70	0.27378	0.632	0.367	1.72e-66	4
Hspa9	1.2e-70	0.347106	0.816	0.648	1.9e-66	4
Ppp1r11	1.31e-70	0.290413	0.89	0.757	2.07e-66	4
Eif4a11	1.43e-70	0.261956	0.999	0.996	2.26e-66	4
Parp2	1.79e-70	0.262392	0.501	0.259	2.84e-66	4
Trappc5	3.28e-70	0.2801	0.683	0.431	5.2e-66	4
Pkp4	3.97e-70	0.276649	0.606	0.34	6.3e-66	4
Kras	4.05e-70	0.296822	0.787	0.557	6.43e-66	4
Tbc1d10b	4.15e-70	0.282228	0.705	0.45	6.58e-66	4
Arf6	4.26e-70	0.293187	0.839	0.646	6.76e-66	4
Vps35	8.44e-70	0.278218	0.954	0.87	1.34e-65	4
Coa3	9.71e-70	0.257857	0.968	0.903	1.54e-65	4
Mpv17l2	1.17e-69	0.269006	0.705	0.445	1.85e-65	4
Eif2s1	1.3e-69	0.302636	0.869	0.719	2.07e-65	4
Got2	1.35e-69	0.292057	0.659	0.404	2.13e-65	4
Cox6a1	2.57e-69	0.263393	0.989	0.976	4.08e-65	4
Azin1	2.6e-69	0.314827	0.781	0.528	4.13e-65	4
Uhrf2	3.67e-69	0.296701	0.808	0.589	5.82e-65	4
Nsmce2	4.44e-69	0.292113	0.767	0.535	7.04e-65	4
Ccdc88a	4.82e-69	0.30479	0.733	0.484	7.65e-65	4
Dpagt1	5.16e-69	0.260077	0.654	0.395	8.19e-65	4
Med9	7.29e-69	0.271	0.673	0.417	1.16e-64	4
Tkt	9.15e-69	0.271871	0.963	0.901	1.45e-64	4
Isca2	9.19e-69	0.273084	0.67	0.414	1.46e-64	4
Mtch1	1.44e-68	0.269368	0.962	0.871	2.28e-64	4
Cisd2	1.51e-68	0.27829	0.834	0.642	2.39e-64	4
Ergic2	2.05e-68	0.285658	0.72	0.473	3.24e-64	4
Eef1e1	2.23e-68	0.261004	0.518	0.274	3.53e-64	4
Cct3	5.19e-68	0.299339	0.874	0.696	8.23e-64	4
Bak1	6.64e-68	0.291657	0.789	0.574	1.05e-63	4
Pcnp	1.07e-67	0.280553	0.799	0.571	1.7e-63	4
C1qbp	1.17e-67	0.336853	0.812	0.655	1.85e-63	4
Cuta	1.27e-67	0.269744	0.976	0.904	2.01e-63	4
Tardbp	1.65e-67	0.281216	0.707	0.448	2.61e-63	4
Lrrc59	2.01e-67	0.29019	0.812	0.614	3.19e-63	4
Rnf5	2.23e-67	0.293861	0.786	0.571	3.53e-63	4
Txnl4a	2.29e-67	0.270852	0.927	0.794	3.64e-63	4
Hnrnpd	4.99e-67	0.340151	0.882	0.737	7.91e-63	4
Cxcl14	5.06e-67	0.360782	0.623	0.375	8.03e-63	4
Psma6	5.26e-67	0.273491	0.958	0.875	8.34e-63	4
Commd4	6.82e-67	0.286011	0.847	0.66	1.08e-62	4
Phb2	7.38e-67	0.281945	0.936	0.833	1.17e-62	4
Cnih1	7.39e-67	0.282451	0.719	0.468	1.17e-62	4
Faf1	7.82e-67	0.263962	0.606	0.358	1.24e-62	4
Fdps	8.3e-67	0.339191	0.608	0.357	1.32e-62	4
Lat21	8.34e-67	0.308333	0.963	0.865	1.32e-62	4
Crip12	8.47e-67	0.308262	0.988	0.979	1.34e-62	4
Kif2a	1.54e-66	0.264466	0.663	0.416	2.44e-62	4
Ciapin1	1.94e-66	0.256832	0.628	0.371	3.07e-62	4
Psmc4	2.47e-66	0.2911	0.879	0.728	3.91e-62	4
Pcm1	3.33e-66	0.290584	0.681	0.433	5.28e-62	4
Srsf10	3.42e-66	0.293941	0.696	0.459	5.42e-62	4
Zranb3	4.35e-66	0.253698	0.459	0.226	6.89e-62	4
Prelid3b	4.36e-66	0.256609	0.622	0.369	6.91e-62	4
St13	4.63e-66	0.273896	0.946	0.875	7.34e-62	4
Gemin7	4.83e-66	0.285344	0.845	0.67	7.65e-62	4
Maz	1.25e-65	0.275435	0.693	0.453	1.99e-61	4
Nolc1	1.48e-65	0.330539	0.565	0.332	2.34e-61	4
Ldha1	2.18e-65	0.261441	0.997	0.998	3.46e-61	4
Galk1	3.66e-65	0.279267	0.683	0.438	5.81e-61	4
Mrpl20	5.37e-65	0.262588	0.958	0.887	8.52e-61	4
Mcub	1.18e-64	0.268772	0.699	0.447	1.87e-60	4
Ptpa	1.84e-64	0.26748	0.779	0.535	2.91e-60	4
Cct2	3.58e-64	0.273955	0.93	0.836	5.68e-60	4
Psmb4	4.28e-64	0.263983	0.982	0.959	6.78e-60	4
Eny2	5.12e-64	0.268483	0.712	0.47	8.11e-60	4
Pcbd2	6.26e-64	0.274869	0.859	0.695	9.93e-60	4
Uqcrfs1	8.01e-64	0.250244	0.94	0.854	1.27e-59	4
Gclc	4.32e-63	0.277864	0.482	0.258	6.84e-59	4
Ndufa11	5.33e-63	0.260403	0.954	0.891	8.45e-59	4
Rad23a	6.31e-63	0.259214	0.684	0.436	1e-58	4
Sumo3	1.16e-62	0.279762	0.818	0.626	1.84e-58	4
Igf2bp2	2.03e-62	0.281777	0.434	0.216	3.22e-58	4
Trp53	2.91e-62	0.26963	0.659	0.416	4.61e-58	4
Aida	3.2e-62	0.254445	0.622	0.376	5.08e-58	4
Mrps18a	3.6e-62	0.260712	0.896	0.759	5.71e-58	4
Naa201	3.97e-62	0.267645	0.956	0.866	6.29e-58	4
Mrps18c	7.58e-62	0.264083	0.849	0.69	1.2e-57	4
Cox7b	9.07e-62	0.264285	0.975	0.949	1.44e-57	4
Uqcrc1	9.16e-62	0.260411	0.93	0.804	1.45e-57	4
Polr2j	9.57e-62	0.25538	0.928	0.82	1.52e-57	4
Drg1	1.04e-61	0.268119	0.661	0.425	1.64e-57	4
2021-09-11	1.2e-61	0.276933	0.61	0.373	1.9e-57	4
Trim35	1.82e-61	0.284536	0.756	0.542	2.88e-57	4
Smarca5	2.01e-61	0.302976	0.869	0.711	3.19e-57	4
Hnrnpm	2.46e-61	0.284422	0.846	0.697	3.89e-57	4
Mtpn	3.03e-61	0.254814	0.967	0.904	4.8e-57	4
Hnrnpul2	3.36e-61	0.282555	0.85	0.686	5.32e-57	4
Ebna1bp2	4.83e-61	0.278032	0.648	0.415	7.66e-57	4
Dpysl2	7.02e-61	0.284507	0.726	0.491	1.11e-56	4
Rnase41	1.03e-60	0.285687	0.626	0.375	1.63e-56	4
Atp8b4	1.09e-60	0.251613	0.526	0.289	1.73e-56	4
Psma1	1.13e-60	0.250434	0.933	0.841	1.8e-56	4
Fam96b	1.6e-60	0.266594	0.833	0.662	2.54e-56	4
Hnrnpul1	1.87e-60	0.257173	0.716	0.478	2.97e-56	4
Mrps15	4.35e-60	0.251181	0.938	0.837	6.9e-56	4
Srp19	5.65e-60	0.263777	0.885	0.74	8.96e-56	4
Eif3a	9.49e-60	0.262671	0.986	0.959	1.5e-55	4
Psmd6	9.54e-60	0.266514	0.872	0.719	1.51e-55	4
Magoh	1.41e-59	0.260787	0.717	0.484	2.23e-55	4
Flot2	2.32e-59	0.251948	0.684	0.437	3.68e-55	4
Arpp19	7.16e-59	0.290109	0.857	0.706	1.14e-54	4
Ghitm	7.37e-59	0.250635	0.93	0.813	1.17e-54	4
Sltm	8.56e-59	0.309083	0.756	0.556	1.36e-54	4
Pfkp	8.69e-59	0.257202	0.66	0.416	1.38e-54	4
Imp4	1.47e-58	0.251457	0.732	0.497	2.34e-54	4
U2surp	1.58e-58	0.26324	0.911	0.755	2.51e-54	4
Smarcc1	2.23e-58	0.292983	0.653	0.432	3.53e-54	4
Utp11	2.98e-58	0.256836	0.764	0.538	4.73e-54	4
Psmc1	4.89e-58	0.251307	0.874	0.708	7.75e-54	4
Thrap3	5.31e-58	0.300137	0.812	0.648	8.42e-54	4
E2f1	5.65e-58	0.277789	0.499	0.284	8.96e-54	4
Eprs	8.14e-58	0.312804	0.838	0.711	1.29e-53	4
Ift46	9.85e-58	0.253911	0.528	0.303	1.56e-53	4
Tmem126a	2.49e-57	0.262097	0.784	0.591	3.95e-53	4
Ndufv2	3.26e-57	0.257507	0.918	0.805	5.17e-53	4
Eea1	4.35e-57	0.265749	0.962	0.897	6.9e-53	4
Denr	9.3e-57	0.259296	0.808	0.631	1.47e-52	4
Arl6ip4	9.91e-57	0.251825	0.825	0.641	1.57e-52	4
Mphosph10	1.19e-56	0.26224	0.691	0.46	1.88e-52	4
Dhx9	5.2e-56	0.263586	0.619	0.385	8.24e-52	4
Cct8	5.81e-56	0.263341	0.9	0.779	9.21e-52	4
Hmga2	9.67e-56	0.28355	0.275	0.113	1.53e-51	4
Glipr1	9.95e-56	0.361187	0.926	0.862	1.58e-51	4
Cyb5r3	9.97e-56	0.257228	0.932	0.818	1.58e-51	4
Akirin2	1.54e-55	0.303718	0.752	0.565	2.44e-51	4
Ola1	1.12e-54	0.254882	0.809	0.618	1.78e-50	4
Gtf2f1	2.05e-54	0.256789	0.782	0.588	3.25e-50	4
Ptbp1	2.75e-54	0.258113	0.696	0.471	4.35e-50	4
Psmc2	3.92e-54	0.25048	0.87	0.725	6.21e-50	4
Med21	7.56e-54	0.264139	0.753	0.54	1.2e-49	4
Gkap1	9.07e-54	0.258701	0.596	0.372	1.44e-49	4
Cisd1	1.22e-53	0.280974	0.798	0.625	1.94e-49	4
Ndufv1	2.33e-53	0.255699	0.75	0.528	3.7e-49	4
H2-Q6	3.22e-53	0.259402	0.406	0.209	5.1e-49	4
2010111I01Rik	5.46e-53	0.285381	0.918	0.819	8.66e-49	4
Cnbp	1.02e-52	0.25355	0.923	0.825	1.62e-48	4
Mrpl58	1.87e-52	0.250007	0.669	0.45	2.96e-48	4
Rif1	2.69e-51	0.259723	0.438	0.241	4.26e-47	4
Hax1	1.15e-50	0.294155	0.753	0.555	1.82e-46	4
Eif3b	7.65e-50	0.256814	0.788	0.607	1.21e-45	4
Tax1bp1	1.79e-49	0.282054	0.985	0.981	2.84e-45	4
Sars	4.36e-49	0.273482	0.851	0.719	6.92e-45	4
Psmb9	1.7e-48	0.26616	0.923	0.873	2.69e-44	4
Cd142	1.95e-46	0.380599	0.97	0.921	3.09e-42	4
Stk38	8.57e-46	0.284724	0.742	0.566	1.36e-41	4
Ap3s1	6.35e-45	0.254935	0.943	0.894	1.01e-40	4
Ranbp2	9.89e-45	0.286705	0.831	0.687	1.57e-40	4
Sptbn1	8.9e-44	0.278277	0.826	0.702	1.41e-39	4
Npy1	2.71e-43	0.398376	0.623	0.44	4.29e-39	4
Emp1	1.37e-41	0.256213	0.853	0.735	2.17e-37	4
Dok21	1.47e-41	0.320893	0.634	0.46	2.33e-37	4
H2-Q4	3.23e-40	0.252076	0.552	0.363	5.12e-36	4
Txnrd1	3.57e-40	0.256675	0.845	0.723	5.66e-36	4
Spp11	8.7e-40	0.30842	0.996	0.998	1.38e-35	4
Eid11	2.29e-38	0.257189	0.881	0.772	3.63e-34	4
Atf4	5.01e-37	0.370974	0.783	0.657	7.95e-33	4
Id31	1.98e-31	0.353881	0.432	0.27	3.14e-27	4
Il1rn2	6e-30	0.278989	0.408	0.248	9.51e-26	4
Tgm2	8.14e-29	0.261431	0.545	0.381	1.29e-24	4
Rgs11	1.02e-26	0.403309	0.842	0.808	1.63e-22	4
Myh9	4.4e-24	0.253177	0.85	0.797	6.97e-20	4
Plau1	5.09e-22	0.332141	0.754	0.662	8.07e-18	4
S100a9	0	6.12869	0.993	0.195	0	5
S100a8	0	5.67614	0.991	0.185	0	5
BC100530	0	4.78305	0.934	0.045	0	5
Ngp	0	4.2224	0.286	0.02	0	5
Gm5483	0	4.1909	0.938	0.028	0	5
Lcn2	0	4.06119	0.856	0.028	0	5
Stfa2	0	3.88536	0.848	0.016	0	5
Retnlg	0	3.7857	0.493	0.017	0	5
Stfa2l1	0	3.74452	0.95	0.018	0	5
Stfa3	0	2.87279	0.597	0.009	0	5
Pglyrp1	0	2.71378	0.7	0.014	0	5
Wfdc21	0	2.69587	0.598	0.011	0	5
Cxcl2	0	2.5216	0.821	0.234	0	5
Asprv1	0	2.48924	0.785	0.008	0	5
Gm5416	0	2.3016	0.801	0.005	0	5
Ifitm1	0	2.27651	0.885	0.201	0	5
Cxcr2	0	2.22018	0.931	0.011	0	5
Hp	0	2.21145	0.85	0.177	0	5
Lrg1	0	2.08501	0.777	0.06	0	5
Ly6g	0	1.9726	0.463	0.003	0	5
Il1b	0	1.89026	0.736	0.128	0	5
Srgn	0	1.84356	0.984	0.908	0	5
G0s2	0	1.81832	0.559	0.007	0	5
Mmp9	0	1.80974	0.876	0.135	0	5
Cdk2ap2	0	1.80461	0.966	0.739	0	5
S100a11	0	1.71859	1	0.97	0	5
Slfn4	0	1.70392	0.767	0.063	0	5
Mxd1	0	1.65928	0.89	0.267	0	5
Lsp1	0	1.65774	0.896	0.132	0	5
BC117090	0	1.6571	0.573	0.002	0	5
Sell	0	1.6417	0.826	0.019	0	5
Chil1	0	1.63597	0.652	0.005	0	5
Mcemp1	0	1.61859	0.808	0.034	0	5
Csf3r	0	1.55973	0.979	0.514	0	5
Cebpd	0	1.53378	0.901	0.387	0	5
Ltb	0	1.51511	0.78	0.054	0	5
Slfn1	0	1.51115	0.818	0.166	0	5
2810474O19Rik	0	1.48259	0.949	0.633	0	5
Cxcl3	0	1.45082	0.277	0.02	0	5
Clec4e	0	1.39835	0.812	0.138	0	5
Fbxl5	0	1.37813	0.874	0.348	0	5
Slc16a3	0	1.35092	0.886	0.353	0	5
Hdc	0	1.2718	0.647	0.005	0	5
Igfbp6	0	1.25475	0.605	0.055	0	5
Ltb4r1	0	1.24301	0.729	0.109	0	5
Acta2	0	1.23979	0.556	0.018	0	5
Il1r2	0	1.22503	0.621	0.021	0	5
Slc2a3	0	1.21309	0.597	0.049	0	5
AC110211.1	0	1.21113	0.684	0.006	0	5
Cd177	0	1.19614	0.274	0.004	0	5
Sorl1	0	1.16599	0.822	0.197	0	5
Cd24a	0	1.15395	0.608	0.016	0	5
Gm5150	0	1.13567	0.746	0.25	0	5
Steap4	0	1.11415	0.542	0.004	0	5
Tgfbi	0	1.09462	0.661	0.184	0	5
Trem1	0	1.03885	0.592	0.006	0	5
Il1f9	0	1.03757	0.577	0.004	0	5
Fpr2	0	1.02357	0.587	0.031	0	5
Prdx5	0	1.01338	1	1	0	5
Fpr1	0	0.981818	0.536	0.021	0	5
AA467197	0	0.957121	0.401	0.027	0	5
Tnfrsf23	0	0.955782	0.467	0.096	0	5
Grina	0	0.951638	0.996	0.982	0	5
Gcnt2	0	0.930764	0.609	0.044	0	5
Zyx	0	0.928035	0.952	0.558	0	5
Upp1	0	0.917785	0.473	0.005	0	5
C3	0	0.90928	0.649	0.144	0	5
Ppp1r3b	0	0.909167	0.586	0.122	0	5
Slc7a11	0	0.890716	0.41	0.038	0	5
Fgr	0	0.872745	0.603	0.029	0	5
Rflnb	0	0.81064	0.305	0.003	0	5
Padi4	0	0.768366	0.296	0.006	0	5
Trem3	0	0.760429	0.374	0.005	0	5
Egln3	0	0.746384	0.425	0.032	0	5
Rdh12	0	0.739814	0.423	0.008	0	5
Stx11	0	0.739611	0.527	0.083	0	5
Glipr2	0	0.737818	0.46	0.032	0	5
Mrgpra2b	0	0.704674	0.345	0.001	0	5
Pilra	0	0.681385	0.444	0.07	0	5
Acod1	0	0.680004	0.337	0.009	0	5
Tarm1	0	0.660614	0.411	0.026	0	5
Hcar2	0	0.636478	0.296	0.014	0	5
Nfe2	0	0.622608	0.385	0.012	0	5
Rufy4	0	0.605631	0.334	0.002	0	5
Il18rap	0	0.603604	0.416	0.007	0	5
Mirt1	0	0.603027	0.394	0.024	0	5
Tacstd2	0	0.598199	0.372	0.004	0	5
Cyp4f18	0	0.561415	0.269	0.01	0	5
Ankrd22	0	0.553597	0.36	0.001	0	5
Pi16	0	0.552463	0.342	0.006	0	5
Rnf144a	0	0.547658	0.366	0.004	0	5
Pilrb2	0	0.543431	0.378	0.055	0	5
Mapk13	0	0.519687	0.277	0.004	0	5
Pdlim7	0	0.514958	0.399	0.056	0	5
Trim30b	0	0.486965	0.316	0.015	0	5
Alox5	0	0.480233	0.362	0.029	0	5
Klra2	0	0.473836	0.315	0.031	0	5
Pram1	0	0.455505	0.32	0.018	0	5
Ripor2	0	0.441568	0.301	0.009	0	5
Gm28192	0	0.42341	0.251	0.019	0	5
Hmgb21	5.44e-306	1.44089	0.963	0.705	8.63e-302	5
Alox5ap	1.66e-305	0.959251	0.999	0.972	2.63e-301	5
Ptgs2	2.54e-301	0.857232	0.4	0.071	4.02e-297	5
H3f3a	5.42e-301	0.738992	1	1	8.6e-297	5
Ctse	5.63e-300	0.599528	0.477	0.103	8.92e-296	5
Mcl1	1.3e-299	0.836114	0.999	0.999	2.06e-295	5
Il13ra1	3.21e-295	0.614017	0.447	0.094	5.1e-291	5
Nedd9	1.97e-294	0.413309	0.329	0.048	3.13e-290	5
Itgal	1.56e-291	0.431836	0.32	0.045	2.48e-287	5
Myl12b	9.95e-291	0.842162	0.992	0.949	1.58e-286	5
S100a62	1.02e-285	1.63513	0.984	0.853	1.62e-281	5
Coro1a1	2.57e-285	1.04317	0.989	0.833	4.08e-281	5
Il17ra	3.95e-283	0.669987	0.567	0.16	6.26e-279	5
Msrb11	2.41e-278	0.917897	1	0.96	3.83e-274	5
Rasgrp4	8.24e-274	0.523138	0.45	0.099	1.31e-269	5
Lst11	4.22e-273	0.851242	0.997	0.912	6.69e-269	5
Sirpb1c	1e-267	0.585008	0.447	0.101	1.59e-263	5
Txn12	7.4e-266	0.720929	1	0.999	1.17e-261	5
Eif1	4.63e-265	0.618374	1	1	7.33e-261	5
Slc22a15	1.17e-262	0.500727	0.374	0.071	1.85e-258	5
Btg1	2.02e-262	1.11405	0.974	0.854	3.2e-258	5
Pkm2	1.02e-259	0.752306	1	0.997	1.62e-255	5
Pten	7.43e-255	0.790862	0.925	0.626	1.18e-250	5
Rac2	5.34e-247	0.888075	0.994	0.975	8.47e-243	5
Eno11	1.87e-238	0.792203	0.993	0.922	2.96e-234	5
Mmp8	1.37e-236	1.16794	0.949	0.763	2.17e-232	5
Cebpb	9.04e-236	0.976349	1	0.979	1.43e-231	5
Rab27a	2.13e-233	0.399021	0.292	0.047	3.38e-229	5
Cnn2	4.89e-232	0.865508	0.574	0.199	7.76e-228	5
Tmcc1	6.14e-232	0.863767	0.82	0.474	9.73e-228	5
Lcp1	9.43e-231	0.663257	0.999	0.99	1.5e-226	5
Vasp	2.07e-230	0.917002	0.775	0.453	3.28e-226	5
Gpr141	1.07e-223	0.712857	0.525	0.159	1.7e-219	5
Pnrc1	2.14e-220	0.840638	0.959	0.822	3.39e-216	5
Gpat3	3.03e-220	0.355622	0.254	0.038	4.81e-216	5
Slfn2	1.76e-218	0.709651	0.997	0.974	2.8e-214	5
Ptprc	1.59e-217	0.666633	0.992	0.952	2.52e-213	5
Ppp1r21	5.78e-216	0.7577	0.859	0.551	9.16e-212	5
Glrx1	3.07e-215	0.811581	0.936	0.61	4.86e-211	5
Lmnb11	1.37e-213	0.539326	0.415	0.099	2.16e-209	5
Zfp608	1.09e-212	0.611052	0.529	0.173	1.73e-208	5
Ogfrl1	5.5e-212	0.7955	0.698	0.336	8.72e-208	5
Pbxip1	3.11e-210	0.639438	0.532	0.177	4.94e-206	5
Plac8	5.15e-209	0.983182	0.483	0.141	8.17e-205	5
Sntb2	1.07e-207	0.850252	0.706	0.353	1.69e-203	5
Stk17b	7.74e-207	0.764644	0.93	0.626	1.23e-202	5
Ccr11	3.76e-206	0.900203	0.953	0.709	5.97e-202	5
Dhrs7	3.71e-204	0.782098	0.945	0.727	5.89e-200	5
Pim1	2.43e-202	0.799544	0.993	0.905	3.86e-198	5
Cd33	3.86e-198	0.689827	0.538	0.187	6.11e-194	5
Lyst	8.44e-198	0.721253	0.956	0.716	1.34e-193	5
2310001H17Rik	8.99e-194	0.80899	0.697	0.35	1.43e-189	5
Gmfg1	1.51e-193	0.794726	0.96	0.745	2.39e-189	5
Pygl	1.07e-192	0.885039	0.759	0.469	1.69e-188	5
Slpi1	5.27e-192	0.934563	0.587	0.216	8.36e-188	5
Arg22	3.15e-191	0.691242	0.862	0.489	4.99e-187	5
Lpcat2	6.53e-185	0.510823	0.435	0.125	1.04e-180	5
Klf21	6.38e-184	0.764842	0.905	0.55	1.01e-179	5
Tspan13	7.91e-184	0.829284	0.682	0.346	1.25e-179	5
Lbr1	7.13e-181	0.63654	0.496	0.173	1.13e-176	5
Eif4ebp1	3.81e-179	0.720551	0.964	0.816	6.04e-175	5
Isg20	3.39e-178	0.579525	0.36	0.092	5.37e-174	5
Cytip	9.88e-177	0.635956	0.606	0.244	1.57e-172	5
Rab11fip1	4.65e-173	0.381684	0.32	0.073	7.37e-169	5
Map1lc3b	3.68e-171	0.65122	0.996	0.997	5.83e-167	5
Neat1	8.74e-169	0.794406	0.996	0.96	1.39e-164	5
Nudt41	2.45e-168	0.770718	0.703	0.401	3.89e-164	5
Ssh2	5.19e-165	0.610081	0.582	0.248	8.22e-161	5
Trib1	2.7e-164	0.673719	0.625	0.285	4.28e-160	5
Id11	6.27e-162	0.362105	0.299	0.065	9.94e-158	5
Ifitm6	5.46e-161	1.82509	0.474	0.18	8.66e-157	5
Ckap4	5.64e-161	0.897943	0.604	0.302	8.94e-157	5
Atg3	1.22e-159	0.62859	0.937	0.76	1.94e-155	5
Bnip3	2.35e-159	0.816011	0.599	0.29	3.73e-155	5
Btg21	3.7e-159	0.766158	0.945	0.701	5.86e-155	5
Fam49b	6.87e-159	0.568324	0.957	0.756	1.09e-154	5
Ccnd3	7.02e-158	0.824861	0.609	0.311	1.11e-153	5
Cd52	3.4e-157	0.862232	0.993	0.951	5.4e-153	5
Gda	8.59e-156	0.618071	0.965	0.761	1.36e-151	5
Cdc42ep3	8.49e-155	0.61994	0.577	0.263	1.35e-150	5
Cd300lf1	2.08e-154	0.618566	0.789	0.472	3.3e-150	5
Gapdh2	7.9e-153	0.519114	1	1	1.25e-148	5
Nfkbia	2.32e-149	0.853773	0.859	0.549	3.69e-145	5
Arhgdib	1.1e-147	0.79315	0.998	0.982	1.74e-143	5
Msra	5.41e-147	0.595281	0.528	0.228	8.57e-143	5
Fam107b	1.69e-146	0.492734	0.396	0.128	2.67e-142	5
Atp11b	1.81e-145	0.664431	0.605	0.31	2.88e-141	5
Nfam1	4.73e-145	0.596429	0.952	0.775	7.49e-141	5
Sfxn5	7.85e-144	0.615962	0.526	0.225	1.24e-139	5
Aldoa	1.64e-143	0.49569	1	1	2.61e-139	5
Gsdme	3.31e-142	0.554582	0.551	0.246	5.25e-138	5
Fam162a	6.03e-141	1.06479	0.799	0.588	9.57e-137	5
Selplg	8.79e-141	0.6082	0.968	0.867	1.39e-136	5
Anxa2	4.96e-140	0.520016	0.996	0.994	7.86e-136	5
Ncf2	2.66e-139	0.522214	0.985	0.931	4.22e-135	5
Bst1	1.07e-138	0.609201	0.837	0.587	1.69e-134	5
Dedd2	6.27e-138	0.439249	0.389	0.127	9.95e-134	5
Pbx1	6.27e-134	0.457762	0.362	0.112	9.94e-130	5
Arpc21	9.16e-133	0.382282	1	1	1.45e-128	5
Tsc22d4	5.6e-132	0.493863	0.979	0.893	8.88e-128	5
Ier21	2.77e-131	0.649348	0.959	0.744	4.39e-127	5
Pag1	3.88e-131	0.524805	0.468	0.192	6.15e-127	5
Mtus1	1.06e-130	0.601853	0.521	0.232	1.69e-126	5
Taldo1	6.91e-130	0.467407	0.999	0.997	1.1e-125	5
Zcchc6	1.72e-129	0.563767	0.924	0.724	2.73e-125	5
Eif5	5.49e-129	0.476679	0.996	0.953	8.71e-125	5
Sirpb1a	2.38e-128	0.308088	0.253	0.059	3.77e-124	5
Marcksl11	2.66e-128	0.673995	0.64	0.318	4.22e-124	5
Ypel3	5.65e-128	0.541707	0.963	0.891	8.96e-124	5
Gpsm3	1.46e-125	0.472093	0.983	0.917	2.31e-121	5
Lrrfip1	1.23e-124	0.521392	0.885	0.633	1.94e-120	5
F630028O10Rik	1.36e-123	0.841181	0.65	0.39	2.16e-119	5
Mfsd6	1.47e-122	0.481181	0.434	0.168	2.33e-118	5
Kdm6b	2.31e-122	0.529059	0.614	0.321	3.67e-118	5
Sat1	1.37e-121	0.487747	0.999	0.977	2.18e-117	5
Apbb1ip	1.75e-121	0.534125	0.955	0.853	2.78e-117	5
Ubb	2.87e-121	0.338389	1	1	4.54e-117	5
Spi1	2.96e-119	0.392531	0.999	0.996	4.7e-115	5
Socs3	4.16e-119	0.664792	0.641	0.346	6.59e-115	5
Ceacam1	8.58e-119	0.429126	0.315	0.096	1.36e-114	5
Isg151	5.25e-118	0.99347	0.811	0.538	8.32e-114	5
Ier5	5.6e-118	0.609528	0.907	0.722	8.87e-114	5
Fas	6.61e-118	0.602271	0.413	0.161	1.05e-113	5
Mbd2	1.52e-116	0.490161	0.952	0.814	2.41e-112	5
Rhog	1.21e-115	0.466508	0.989	0.933	1.92e-111	5
2021-03-07	1.58e-115	0.549273	0.77	0.536	2.5e-111	5
Adipor1	4.72e-114	0.461514	0.986	0.931	7.48e-110	5
Emilin2	5.77e-114	0.533603	0.951	0.892	9.15e-110	5
Rlf	1.11e-113	0.552765	0.608	0.343	1.75e-109	5
Fmnl11	1.15e-113	0.473085	0.527	0.252	1.83e-109	5
Sema4a	2.98e-113	0.376534	0.341	0.112	4.73e-109	5
Plbd1	9.77e-112	0.476507	0.353	0.118	1.55e-107	5
Ube2b	1.6e-111	0.467821	0.958	0.886	2.54e-107	5
Fxyd5	1.91e-111	0.475629	1	1	3.04e-107	5
Igsf6	4.38e-111	0.543178	0.877	0.654	6.94e-107	5
Snx18	8.5e-111	0.556772	0.683	0.444	1.35e-106	5
Chd7	1.42e-110	0.494409	0.514	0.248	2.25e-106	5
Ankrd37	8.23e-110	0.581182	0.417	0.169	1.3e-105	5
Samsn1	2.07e-109	0.596735	0.575	0.312	3.29e-105	5
Cd37	2.11e-108	0.450268	0.983	0.885	3.34e-104	5
Junb1	1.9e-107	0.581775	0.993	0.961	3.02e-103	5
Slc2a6	2.95e-107	0.326121	0.264	0.073	4.67e-103	5
Osgin1	3.22e-106	0.445942	0.353	0.125	5.11e-102	5
Rab32	4.26e-106	0.581026	0.64	0.396	6.75e-102	5
Ppp2r5a	8.31e-106	0.511481	0.849	0.608	1.32e-101	5
Ehd11	9.25e-104	0.533008	0.824	0.564	1.47e-99	5
Tspo	2.56e-103	0.391812	1	1	4.06e-99	5
Rtp41	3.61e-103	0.749551	0.886	0.716	5.72e-99	5
Ncf1	6.94e-103	0.586655	0.945	0.784	1.1e-98	5
Bcl10	3.35e-102	0.438902	0.874	0.657	5.31e-98	5
Skap2	1.3e-101	0.429165	0.987	0.933	2.06e-97	5
Tpd52	1.12e-100	0.43024	0.985	0.985	1.78e-96	5
Myh91	1.69e-100	0.530119	0.967	0.791	2.69e-96	5
Cdkn2d1	3.71e-100	0.764748	0.632	0.428	5.89e-96	5
Ncf4	1.01e-99	0.40237	0.996	0.99	1.61e-95	5
Basp12	3.9e-99	0.644126	0.954	0.956	6.18e-95	5
Spint2	1.04e-98	0.307538	0.257	0.075	1.64e-94	5
Pdlim2	4.6e-96	0.44465	0.471	0.23	7.29e-92	5
D1Ertd622e	5.54e-96	0.51693	0.746	0.532	8.78e-92	5
Samhd1	1.26e-95	0.486199	0.96	0.881	1.99e-91	5
Pgk12	1.52e-95	0.498454	0.993	0.957	2.41e-91	5
Diaph1	5.08e-95	0.426345	0.962	0.829	8.06e-91	5
Fam32a	5.17e-95	0.453503	0.957	0.884	8.2e-91	5
Prr5l	1.72e-94	0.36973	0.261	0.08	2.73e-90	5
A530064D06Rik	2.01e-94	0.337406	0.26	0.078	3.19e-90	5
Snap23	6.42e-94	0.458387	0.847	0.649	1.02e-89	5
Zfp292	3.26e-93	0.548198	0.73	0.51	5.17e-89	5
Gclm	4.72e-92	0.620231	0.87	0.631	7.49e-88	5
Hif1a	3.47e-91	0.512477	0.883	0.706	5.5e-87	5
Cited2	5.86e-91	0.519101	0.875	0.655	9.3e-87	5
Hipk1	6.74e-91	0.530033	0.659	0.474	1.07e-86	5
Dok3	1.62e-90	0.493345	0.561	0.33	2.56e-86	5
Lyn	8.43e-90	0.418918	0.939	0.772	1.34e-85	5
Nfil3	6.18e-89	0.555967	0.654	0.425	9.8e-85	5
Ptbp3	1.22e-88	0.428202	0.978	0.881	1.93e-84	5
Ube2d3	2.77e-88	0.347763	0.995	0.986	4.39e-84	5
Celf2	3.51e-87	0.437342	0.932	0.77	5.56e-83	5
Jaml	2.53e-86	0.574498	0.531	0.283	4.01e-82	5
Plp21	3.36e-86	0.528319	0.662	0.44	5.32e-82	5
Txnip	2.29e-85	0.591547	0.988	0.959	3.63e-81	5
Slc2a1	4.79e-85	0.49118	0.483	0.25	7.59e-81	5
Gcnt1	5.38e-85	0.524677	0.772	0.573	8.53e-81	5
Sri	3.56e-84	0.437819	0.985	0.944	5.64e-80	5
Fam129a	3.89e-84	0.435558	0.45	0.22	6.17e-80	5
Abtb1	4.28e-84	0.516339	0.556	0.338	6.78e-80	5
Cdkn1b	2.27e-83	0.487042	0.584	0.356	3.6e-79	5
Gsn2	2.27e-83	0.472542	0.967	0.885	3.6e-79	5
Rcsd1	5.89e-83	0.448126	0.434	0.216	9.33e-79	5
Actn1	5.93e-82	0.445329	0.79	0.554	9.39e-78	5
Jdp2	4.72e-81	0.340378	0.307	0.116	7.49e-77	5
Sbno2	1.19e-80	0.384671	0.882	0.666	1.88e-76	5
Arhgap45	1.48e-80	0.387344	0.875	0.659	2.35e-76	5
Hck	2.41e-80	0.4818	0.718	0.519	3.82e-76	5
Tirap	3.53e-80	0.328699	0.371	0.158	5.59e-76	5
Cmip	5.32e-80	0.379574	0.864	0.654	8.44e-76	5
Kdm7a	1.9e-79	0.437157	0.839	0.599	3.02e-75	5
Prr13	1.42e-78	0.562651	0.986	0.965	2.25e-74	5
Rnf11	5.41e-78	0.485955	0.557	0.346	8.58e-74	5
Gpi1	2.98e-77	0.407968	0.99	0.979	4.73e-73	5
Il16	4.79e-77	0.326954	0.352	0.148	7.6e-73	5
Slc38a21	9.72e-77	0.445275	0.472	0.256	1.54e-72	5
Ero1l	1.46e-76	0.622866	0.533	0.331	2.31e-72	5
E230032D23Rik	1.69e-76	0.583058	0.361	0.163	2.68e-72	5
Sem1	2.02e-76	0.309125	1	0.999	3.21e-72	5
Nfkbiz	3.63e-76	0.376	0.378	0.165	5.76e-72	5
Gng12	1.46e-75	0.395489	0.96	0.883	2.31e-71	5
Dock5	5.86e-75	0.28468	0.275	0.098	9.29e-71	5
Mettl9	1.47e-74	0.596717	0.665	0.501	2.33e-70	5
Trim12c	3.63e-74	0.495548	0.585	0.386	5.76e-70	5
Klhl2	4.86e-74	0.360351	0.358	0.158	7.71e-70	5
Srsf5	7.35e-74	0.390048	0.993	0.956	1.17e-69	5
Clec5a	1.98e-73	0.383851	0.286	0.109	3.15e-69	5
Rhoa	9.14e-73	0.273492	1	0.998	1.45e-68	5
Ccnl2	2.8e-71	0.421712	0.729	0.553	4.44e-67	5
Cd82	4.88e-71	0.397856	0.466	0.256	7.73e-67	5
Nsd3	6.9e-71	0.381444	0.866	0.675	1.09e-66	5
Retreg1	8.23e-71	0.475822	0.604	0.417	1.31e-66	5
Pfn12	9.91e-71	0.280489	1	1	1.57e-66	5
Kras1	3.57e-70	0.379778	0.768	0.558	5.66e-66	5
Ubald21	1.52e-69	0.374253	0.903	0.725	2.41e-65	5
Osbpl9	7.52e-69	0.388995	0.903	0.739	1.19e-64	5
Bnip3l1	2.29e-68	0.350517	0.977	0.897	3.63e-64	5
Zfp36l11	2.73e-68	0.505144	0.948	0.874	4.33e-64	5
Neurl3	2.81e-68	0.439679	0.698	0.477	4.45e-64	5
Snx20	5.66e-68	0.396775	0.911	0.776	8.97e-64	5
Mgst11	7.44e-68	0.556227	0.984	0.913	1.18e-63	5
Plk3	1.61e-67	0.275635	0.264	0.097	2.56e-63	5
Serp1	4.26e-67	0.362972	0.97	0.882	6.75e-63	5
Cap11	4.51e-67	0.309345	0.99	0.961	7.15e-63	5
Preb	8.23e-67	0.458653	0.564	0.379	1.31e-62	5
Fau	1.04e-66	0.317065	1	1	1.65e-62	5
Emb	4.23e-66	0.398944	0.96	0.924	6.71e-62	5
H2afj1	5.77e-66	0.402507	0.99	0.965	9.15e-62	5
Cks21	7.18e-66	0.614936	0.349	0.162	1.14e-61	5
Gadd45a2	8.07e-66	0.36169	0.627	0.382	1.28e-61	5
Msn	1.84e-65	0.311139	0.993	0.96	2.92e-61	5
Ptpn6	2.65e-65	0.395527	0.961	0.865	4.2e-61	5
Son	3.37e-65	0.29841	0.995	0.973	5.34e-61	5
Svil	5.77e-65	0.496371	0.526	0.344	9.15e-61	5
Tbc1d15	9.41e-64	0.417194	0.714	0.535	1.49e-59	5
Gadd45b2	1.25e-63	0.455763	0.762	0.544	1.98e-59	5
Apobr	1.47e-63	0.370217	0.795	0.581	2.33e-59	5
Supt4a	1.98e-63	0.35042	0.977	0.92	3.13e-59	5
Jund	9.58e-63	0.314267	0.996	0.981	1.52e-58	5
Hnrnpf1	1.24e-62	0.340713	0.993	0.975	1.97e-58	5
Kmt2e	1.7e-62	0.353677	0.923	0.765	2.7e-58	5
Ier31	1.76e-62	0.417251	0.914	0.753	2.8e-58	5
Ep300	1.98e-62	0.350062	0.831	0.624	3.14e-58	5
Cdc42se1	2.18e-62	0.347393	0.882	0.7	3.46e-58	5
Tpi12	2.29e-62	0.39998	0.99	0.974	3.63e-58	5
Ogt	1.5e-61	0.388669	0.801	0.617	2.38e-57	5
Klf13	1.57e-61	0.344241	0.975	0.896	2.49e-57	5
Rb1cc1	1.8e-61	0.401746	0.765	0.583	2.86e-57	5
Mir142hg	2.05e-61	0.299599	0.316	0.139	3.25e-57	5
Klf7	2.51e-61	0.438139	0.592	0.411	3.98e-57	5
Tnfsf14	4.7e-61	0.294082	0.281	0.115	7.44e-57	5
Treml2	4.89e-61	0.383078	0.456	0.255	7.76e-57	5
Samd9l	5.49e-61	0.423012	0.713	0.517	8.7e-57	5
Rasa2	6.85e-61	0.375101	0.369	0.185	1.09e-56	5
Rnf1492	1.47e-60	0.314382	0.982	0.964	2.32e-56	5
Ppp1r12a	2.01e-60	0.345624	0.9	0.726	3.19e-56	5
Notch2	1.09e-59	0.428843	0.555	0.375	1.73e-55	5
Hcls1	1.27e-59	0.320607	0.857	0.663	2.01e-55	5
Npepps	6.58e-59	0.32539	0.879	0.696	1.04e-54	5
Stat3	1.17e-58	0.313795	0.861	0.679	1.86e-54	5
Actr3	6.88e-58	0.294468	1	0.987	1.09e-53	5
Ostf1	1.2e-57	0.285473	1	0.998	1.91e-53	5
Lilr4b1	1.98e-57	0.340949	0.971	0.928	3.14e-53	5
Tcp11l2	2.74e-57	0.390044	0.421	0.234	4.34e-53	5
Card19	1.92e-56	0.316135	0.989	0.956	3.04e-52	5
Csrnp1	7.43e-56	0.32236	0.296	0.133	1.18e-51	5
Limd21	2.05e-55	0.386941	0.862	0.643	3.25e-51	5
Actg12	8.65e-55	0.302919	1	0.999	1.37e-50	5
Mboat7	2.55e-53	0.398337	0.567	0.41	4.04e-49	5
Pgd	3.27e-52	0.340209	0.977	0.901	5.19e-48	5
Hcst	3.85e-52	0.322566	0.865	0.701	6.1e-48	5
Syf2	7.15e-52	0.315482	0.911	0.77	1.13e-47	5
Pnkp	9.51e-52	0.569529	0.484	0.333	1.51e-47	5
[truncated: 3,643 more rows]

## Sheet: Supl.Table 4_Antibody used
Antibody	Clone	Species reactivity	Catalog #	Company
CD19-PE	1D3	Mouse	152408	BioLegend
CD19-APC	1D3	Mouse	152410	BioLegend
CD19-BUV421	HIB19	Human	302234	BioLegend
F4/80-APC	BM8	Mouse	123116	BioLegend
F4/80-BV421	BM8	Mouse	123137	BioLegend
CD11b-BV510	M1/70	Mouse/Human	101263	BioLegend
CD11b-FITC	M1/70	Mouse/Human	101206	BioLegend
CD68-BV421	FA-11	Mouse	137017	BioLegend
CD93-APC	AA4.1	Mouse	136510	BioLegend
CSF1R-PE/Cyanine7	AFS98	Mouse	135524	BioLegend
IgM-PE/Cyanine7	RMM-1	Mouse	406514	BioLegend
IgD-BV510	11-26c.2a	Mouse	405723	BioLegend
CD20-BV421	SA275A11	Mouse	150405	BioLegend
CD20-APC	2H7	Human	302310	BioLegend
CD10-PE	HI10a	Human	312204	BioLegend
CD79a-PE	F11-172	Mouse	133103	BioLegend
TER119-Biotin	TER-119	Mouse	116204	BioLegend
CD11b-Biotin	M1/70	Mouse/Human	101204	BioLegend
Gr-1-Biotin	RB6-8C5	Mouse	108404	BioLegend
CD3ε-Biotin	145-2C11	Mouse	100304	BioLegend
NK1.1-Biotin	PK136	Mouse	108704	BioLegend
CD49b-Biotin	HMα2	Mouse	103522	BioLegend
CD49b-Biotin	DX5	Mouse	108904	BioLegend
Ly6C-Biotin	HK1.4	Mouse	128004	BioLegend
Ly6G-Biotin	1A8	Mouse	127604	BioLegend
CD11c-Biotin	N418	Mouse	117304	BioLegend
CD117-Biotin	2B8	Mouse	105804	BioLegend
Alexa Fluor® 488 Streptavidin	-	-	405235	BioLegend
I-A/I-E-PerCP/Cyanine5.5	M5/114.15.2	Mouse	107626	BioLegend
CD206-FITC	C068C2	Mouse	141704	BioLegend
B220-FITC	RA3-6B2	Mouse/Human	103206	BioLegend
IgM-PE/Dazzle™ 594	RMM-1	Mouse	406530	BioLegend
CD93-PE	AA4.1	Mouse	136504	BioLegend
CD43-APC	S11	Mouse	143208	BioLegend
CD24-BV605	M1/69	Mouse	101827	BioLegend
CD274-PE/Cyanine7	10F.9G2	Mouse	124314	BioLegend
LAP-PerCP/Cyanine5.5	TW7-16B4	Mouse	141410	BioLegend
CD4-PerCP/Cyanine5.5	GK1.5	Mouse	100434	BioLegend
CD8a-FITC	53-6.7	Mouse	100706	BioLegend
IFN-γ-APC	XMG1.2	Mouse	505810	BioLegend
PAX5-Alexa Fluor® 488	1H9	Mouse/Human	562816	BD
CD71-BV605	C2	Mouse	563013	BD
CD124-BV421	Mil4R-M1	Mouse	564086	BD
CD366-BV421	5D12	Mouse	747626	BD
CD19-BUV395	1D3	Mouse	563557	BD
CD11b-BV786	M1/70	Mouse/ Human	740861	BD
CSF1R-BB515	9-4D2-1E4	Human	565346	BD
LDLR-BUV805	C7	Human	748950	BD
CSF3R-BUV395	LMM741	Human	743524	BD
Granzyme B-PE/Cyanine7	NGZB	Mouse	12-8898-82	eBioscience
FOXP3-PE	FJK-16s	Mouse	12-5773-82	eBioscience
Ki67-eFluor 450	SolA15	Mouse/Human	48-5698-82	eBioscience
CD68-PE-eFluor 610	Y1/82A	Human	61-0689-42	eBioscience
